# Supplementary material for: Protein Structure, Models of Sequence Evolution, and Data Type Effects in Phylogenetic Analyses of Mitochondrial Data: A Case Study in Birds
Source: Preprints.org preprint supplement (doi:10.20944/preprints202109.0503.v1), 2021-09-29
Supplement: Supplementary file 1 [file supplementary]

## Sheet: bird mtMIX
# Site likelihood per rate/mixture category							bird_mtMIX:				ExM_diff	TM_diff
# This file can be read in MS Excel or in R with command:							c1 = ExM component (est wt = 0.4057)			Min	-84.3431	-32.7451
# tab=read.table('420taxon_concat_AA_mixture.sitelh',header=TRUE,fill=TRUE)							c2 = TM component (est wt = 0.5943)			Lower 5%	-16.4451	-2.92097
# Columns are tab-separated with following meaning:										Lower Q	-1.6424	0.3038
# Site: Alignment site ID										Median	0.0894	1.2827
# LnL: Logarithm of site likelihood										Upper Q	1.23255	2.16975
# Thus, sum of LnL is equal to tree log-likelihood										Upper 95%	5.52736	9.71477
# LnLW_k: Logarithm of (category-k site likelihood times category-k weight)										Max	31.0646	29.7328
# Thus, sum of exp(LnLW_k) is equal to exp(LnL)
Site	LnL	LnLW_1	LnLW_2	LW_2 - LW_1	Structure					NOTE: Positive values favor TM, negative favor ExM
1	-44.8985	-45.8886	-45.3629	0.5257	ExM
2	-427.866	-427.866	-436.332	-8.4655	ExM
3	-27.1888	-27.2133	-30.9108	-3.6975	ExM
4	-403.929	-403.929	-444.827	-40.8982	ExM
5	-371.267	-371.267	-407.352	-36.0853	ExM
6	-337.951	-337.951	-381.966	-44.0151	ExM
7	-411.642	-411.642	-435.579	-23.9373	ExM
8	-315.253	-315.253	-326.448	-11.1947	ExM
9	-370.899	-370.972	-373.561	-2.5892	ExM
10	-331.373	-331.374	-339.803	-8.4295	ExM
11	-14.7377	-15.3078	-15.5711	-0.2633	ExM
12	-5.6796	-5.7367	-8.5719	-2.8352	ExM
13	-5.3165	-5.5676	-6.8212	-1.2536	ExM
14	-208.625	-212.493	-208.646	3.8462	ExM
15	-3.5022	-5.1347	-3.7197	1.415	ExM
16	-15.0976	-16.0295	-15.5982	0.4313	ExM
17	-13.7914	-14.8325	-14.2269	0.6056	ExM
18	-16.8097	-17.815	-17.2653	0.5497	ExM
19	-5.5652	-5.9109	-6.7952	-0.8843	ExM
20	-196.891	-196.892	-205.312	-8.4206	ExM
21	-5.6796	-5.7367	-8.5719	-2.8352	ExM
22	-5.3165	-5.5676	-6.8212	-1.2536	ExM
23	-4.2624	-5.5336	-4.5915	0.9421	ExM
24	-14.2475	-14.6931	-15.2704	-0.5773	ExM
25	-5.596	-5.8921	-6.9575	-1.0654	ExM
26	-108.003	-111.704	-108.028	3.6752	ExM
27	-20.3143	-21.6434	-20.6218	1.0216	ExM
28	-4.2624	-5.5336	-4.5915	0.9421	ExM
29	-4.6616	-5.3996	-5.3117	0.0879	ExM
30	-94.6026	-94.9673	-95.7881	-0.8208	ExM
31	-16.587	-18.0178	-16.8603	1.1575	ExM
32	-3.5022	-5.1347	-3.7197	1.415	ExM
33	-13.0066	-13.5273	-13.9081	-0.3808	ExM
34	-5.5652	-5.9109	-6.7952	-0.8843	ExM
35	-13.075	-13.7464	-13.7905	-0.0441	ExM
36	-212.877	-215.017	-213.002	2.015	ExM
37	-35.4531	-35.7914	-36.7014	-0.91	ExM
38	-15.0522	-15.2078	-16.9891	-1.7813	ExM
39	-4.2624	-5.5336	-4.5915	0.9421	ExM
40	-176.025	-176.761	-176.676	0.0849	ExM
41	-5.3165	-5.5676	-6.8212	-1.2536	ExM
42	-17.5326	-18.2331	-18.2183	0.0148	ExM
43	-18.4946	-20.2592	-18.6824	1.5768	ExM
44	-141.454	-143.07	-141.675	1.3947	ExM
45	-5.3165	-5.5676	-6.8212	-1.2536	ExM
46	-5.1194	-5.5535	-6.163	-0.6095	ExM
47	-4.6616	-5.3996	-5.3117	0.0879	ExM
48	-84.9916	-86.2176	-85.3389	0.8787	ExM
49	-63.5861	-63.5862	-72.8125	-9.2263	ExM
50	-4.6616	-5.3996	-5.3117	0.0879	ExM
51	-44.947	-46.245	-45.266	0.979	ExM
52	-55.9759	-56.0182	-59.1608	-3.1426	ExM
53	-45.6058	-50.7946	-45.6114	5.1832	ExM
54	-35.8298	-39.8908	-35.8472	4.0436	ExM
55	-12.8835	-13.329	-13.9065	-0.5775	ExM
56	-4.6616	-5.3996	-5.3117	0.0879	ExM
57	-107.05	-110.942	-107.07	3.8722	ExM
58	-4.6616	-5.3996	-5.3117	0.0879	ExM
59	-91.4165	-92.0449	-92.179	-0.1341	ExM
60	-261.23	-261.23	-283.031	-21.8005	ExM
61	-38.0417	-38.8389	-38.6406	0.1983	ExM
62	-195.071	-205.561	-195.071	10.4895	ExM
63	-6.0405	-6.2174	-7.8598	-1.6424	ExM
64	-48.7217	-50.9423	-48.8366	2.1057	ExM
65	-5.596	-5.8921	-6.9575	-1.0654	ExM
66	-4.1933	-5.4276	-4.5372	0.8904	ExM
67	-12.6853	-13.9637	-13.0117	0.952	ExM
68	-12.4003	-12.8361	-13.4409	-0.6048	ExM
69	-5.596	-5.8921	-6.9575	-1.0654	ExM
70	-5.036	-6.1675	-5.4255	0.742	ExM
71	-5.3165	-5.5676	-6.8212	-1.2536	ExM
72	-5.6625	-6.6103	-6.1528	0.4575	ExM
73	-4.9671	-6.5613	-5.1941	1.3672	ExM
74	-12.291	-12.8121	-13.1922	-0.3801	ExM
75	-35.2722	-36.3422	-35.6922	0.65	ExM
76	-4.2624	-5.5336	-4.5915	0.9421	ExM
77	-59.4254	-61.1305	-59.626	1.5045	ExM
78	-20.6701	-21.4275	-21.3028	0.1247	ExM
79	-5.6796	-5.7367	-8.5719	-2.8352	ExM
80	-4.9671	-6.5613	-5.1941	1.3672	ExM
81	-21.7486	-23.0774	-22.0563	1.0211	ExM
82	-28.8691	-29.2828	-29.9515	-0.6687	ExM
83	-5.5652	-5.9109	-6.7952	-0.8843	ExM
84	-13.061	-13.993	-13.5615	0.4315	ExM
85	-13.0049	-14.1871	-13.371	0.8161	ExM
86	-5.036	-6.1675	-5.4255	0.742	ExM
87	-5.6625	-6.6103	-6.1528	0.4575	ExM
88	-5.1194	-5.5535	-6.163	-0.6095	ExM
89	-6.6388	-7.741	-7.0426	0.6984	ExM
90	-5.2608	-6.019	-5.8929	0.1261	ExM
91	-3.5022	-5.1347	-3.7197	1.415	ExM
92	-149.075	-151.76	-149.145	2.6148	ExM
93	-5.5652	-5.9109	-6.7952	-0.8843	ExM
94	-5.1194	-5.5535	-6.163	-0.6095	ExM
95	-15.3613	-15.6807	-16.6581	-0.9774	ExM
96	-5.2608	-6.019	-5.8929	0.1261	ExM
97	-15.0176	-15.2126	-16.7485	-1.5359	ExM
98	-5.6796	-5.7367	-8.5719	-2.8352	ExM
99	-12.3969	-13.6852	-12.7195	0.9657	ExM
100	-4.6616	-5.3996	-5.3117	0.0879	ExM
101	-20.1103	-21.8747	-20.2982	1.5765	ExM
102	-19.6871	-20.0347	-20.9127	-0.878	ExM
103	-21.2028	-23.2431	-21.342	1.9011	ExM
104	-19.9432	-21.0713	-20.3342	0.7371	ExM
105	-5.1194	-5.5535	-6.163	-0.6095	ExM
106	-4.2624	-5.5336	-4.5915	0.9421	ExM
107	-5.1194	-5.5535	-6.163	-0.6095	ExM
108	-5.036	-6.1675	-5.4255	0.742	ExM
109	-5.1194	-5.5535	-6.163	-0.6095	ExM
110	-3.5022	-5.1347	-3.7197	1.415	ExM
111	-6.6388	-7.741	-7.0426	0.6984	ExM
112	-5.036	-6.1675	-5.4255	0.742	ExM
113	-4.26	-5.5311	-4.5892	0.9419	ExM
114	-14.3517	-15.7703	-14.6288	1.1415	ExM
115	-5.596	-5.8921	-6.9575	-1.0654	ExM
116	-13.3591	-14.6795	-13.6698	1.0097	ExM
117	-5.1194	-5.5535	-6.163	-0.6095	ExM
118	-5.6625	-6.6103	-6.1528	0.4575	ExM
119	-68.376	-69.732	-68.6739	1.0581	ExM
120	-4.9671	-6.5613	-5.1941	1.3672	ExM
121	-21.4657	-21.6602	-23.1986	-1.5384	ExM
122	-4.6616	-5.3996	-5.3117	0.0879	ExM
123	-4.7908	-6.5366	-4.9826	1.554	ExM
124	-33.3577	-35.4874	-33.4843	2.0031	ExM
125	-12.1506	-13.7376	-12.3794	1.3582	ExM
126	-27.1962	-27.9358	-27.8449	0.0909	ExM
127	-4.6616	-5.3996	-5.3117	0.0879	ExM
128	-36.5814	-36.8234	-38.1188	-1.2954	ExM
129	-368.91	-379.703	-368.91	10.7931	ExM
130	-170.065	-177.733	-170.066	7.6671	ExM
131	-260.253	-260.253	-270.134	-9.8808	ExM
132	-348.845	-348.845	-402.934	-54.0892	ExM
133	-240.306	-240.306	-251.988	-11.6814	ExM
134	-328.405	-328.405	-362.783	-34.3779	ExM
135	-5.6796	-5.7367	-8.5719	-2.8352	ExM
136	-4.9671	-6.5613	-5.1941	1.3672	ExM
137	-13.6018	-14.0376	-14.6422	-0.6046	ExM
138	-31.7548	-33.497	-31.9474	1.5496	ExM
139	-4.6616	-5.3996	-5.3117	0.0879	ExM
140	-14.8635	-14.8852	-18.7037	-3.8185	ExM
141	-4.7908	-6.5366	-4.9826	1.554	ExM
142	-5.6796	-5.7367	-8.5719	-2.8352	ExM
143	-5.6625	-6.6103	-6.1528	0.4575	ExM
144	-6.0405	-6.2174	-7.8598	-1.6424	ExM
145	-5.5652	-5.9109	-6.7952	-0.8843	ExM
146	-3.5022	-5.1347	-3.7197	1.415	ExM
147	-6.0021	-7.2654	-6.3344	0.931	ExM
148	-37.2957	-37.7711	-38.2675	-0.4964	ExM
149	-3.5022	-5.1347	-3.7197	1.415	ExM
150	-3.5022	-5.1347	-3.7197	1.415	ExM
151	-4.1933	-5.4276	-4.5372	0.8904	ExM
152	-5.3165	-5.5676	-6.8212	-1.2536	ExM
153	-64.521	-68.2681	-64.5448	3.7233	ExM
154	-95.78	-100.978	-95.7856	5.1921	ExM
155	-13.3201	-13.9912	-14.0358	-0.0446	ExM
156	-20.5978	-21.2311	-21.3545	-0.1234	ExM
157	-294.976	-297.768	-295.039	2.7287	ExM
158	-154.689	-154.694	-159.957	-5.2629	ExM
159	-5.2972	-5.9983	-5.9824	0.0159	ExM
160	-62.3312	-63.4799	-62.7126	0.7673	ExM
161	-113.169	-115.835	-113.241	2.5947	ExM
162	-4.6616	-5.3996	-5.3117	0.0879	ExM
163	-165.6	-165.621	-169.451	-3.8295	ExM
164	-77.3945	-77.6472	-78.8937	-1.2465	ExM
165	-132.826	-134.079	-133.162	0.9168	ExM
166	-85.6473	-88.0771	-85.7395	2.3376	ExM
167	-249.188	-249.472	-250.587	-1.115	ExM
168	-291.436	-322.501	-291.436	31.0646	ExM
169	-537.69	-537.746	-540.608	-2.8622	ExM
170	-524.935	-525.01	-527.568	-2.5579	ExM
171	-32.2664	-33.4901	-32.6147	0.8754	ExM
172	-27.5362	-30.3808	-27.5961	2.7847	ExM
173	-380.471	-386.183	-380.474	5.7087	ExM
174	-166.035	-172.913	-166.036	6.877	ExM
175	-4.2624	-5.5336	-4.5915	0.9421	ExM
176	-85.2476	-85.2582	-89.7965	-4.5383	ExM
177	-171.266	-171.305	-174.52	-3.2153	ExM
178	-98.4112	-98.6355	-100.016	-1.3805	ExM
179	-39.9874	-41.7126	-40.1836	1.529	ExM
180	-131.306	-134.404	-131.352	3.0515	ExM
181	-49.5744	-50.1024	-50.4654	-0.363	ExM
182	-12.0833	-13.3769	-12.4039	0.973	ExM
183	-137.694	-141.903	-137.709	4.1942	ExM
184	-51.5912	-51.6064	-55.7858	-4.1794	ExM
185	-139.336	-139.336	-158.987	-19.6511	ExM
186	-5.7404	-6.5057	-6.3662	0.1395	ExM
187	-5.7404	-6.5057	-6.3662	0.1395	ExM
188	-4.6616	-5.3996	-5.3117	0.0879	ExM
189	-5.6796	-5.7367	-8.5719	-2.8352	ExM
190	-108.466	-121.659	-108.466	13.1937	ExM
191	-57.5062	-60.7215	-57.5472	3.1743	ExM
192	-176.541	-176.559	-180.579	-4.0205	ExM
193	-313.909	-313.909	-325.332	-11.4229	ExM
194	-21.1842	-21.7854	-21.9785	-0.1931	ExM
195	-13.0525	-14.3408	-13.3752	0.9656	ExM
196	-61.739	-61.7393	-70.0215	-8.2822	ExM
197	-521.886	-521.89	-527.39	-5.4998	ExM
198	-104.636	-104.687	-107.651	-2.9645	ExM
199	-4.2624	-5.5336	-4.5915	0.9421	ExM
200	-5.5652	-5.9109	-6.7952	-0.8843	ExM
201	-4.1933	-5.4276	-4.5372	0.8904	ExM
202	-13.2475	-13.4033	-15.184	-1.7807	ExM
203	-49.7071	-53.1296	-49.7403	3.3893	ExM
204	-93.0818	-93.5075	-94.1412	-0.6337	ExM
205	-43.8751	-44.1977	-45.1637	-0.966	ExM
206	-117.296	-119.917	-117.372	2.5455	ExM
207	-234.239	-234.239	-253.332	-19.0935	ExM
208	-225.84	-225.904	-228.63	-2.7264	ExM
209	-94.0413	-94.0501	-98.7846	-4.7345	ExM
210	-369.049	-369.054	-374.344	-5.2907	ExM
211	-167.185	-169.799	-167.261	2.5378	ExM
212	-4.6616	-5.3996	-5.3117	0.0879	ExM
213	-5.1194	-5.5535	-6.163	-0.6095	ExM
214	-40.6377	-41.704	-41.0597	0.6443	ExM
215	-54.4227	-55.6909	-54.7531	0.9378	ExM
216	-5.5652	-5.9109	-6.7952	-0.8843	ExM
217	-4.2624	-5.5336	-4.5915	0.9421	ExM
218	-140.198	-144.75	-140.209	4.5414	ExM
219	-284.545	-284.545	-313.635	-29.0895	ExM
220	-128.965	-129.808	-129.528	0.2805	ExM
221	-116.334	-116.346	-120.742	-4.3959	ExM
222	-310.988	-310.988	-336.939	-25.9506	ExM
223	-47.2395	-49.6457	-47.334	2.3117	ExM
224	-10.3646	-12.015	-10.5777	1.4373	ExM
225	-18.2651	-18.4466	-20.061	-1.6144	ExM
226	-5.5652	-5.9109	-6.7952	-0.8843	ExM
227	-5.2608	-6.019	-5.8929	0.1261	ExM
228	-5.5652	-5.9109	-6.7952	-0.8843	ExM
229	-307.661	-307.666	-313.079	-5.4133	ExM
230	-28.2384	-28.3245	-30.7333	-2.4088	ExM
231	-5.3165	-5.5676	-6.8212	-1.2536	ExM
232	-136.881	-136.883	-142.901	-6.0185	ExM
233	-242.098	-242.098	-251.62	-9.5219	ExM
234	-262.295	-262.295	-275.554	-13.2589	ExM
235	-95.8066	-98.1244	-95.9103	2.2141	ExM
236	-349.385	-355.957	-349.387	6.5696	ExM
237	-194.991	-198.736	-195.015	3.7213	ExM
238	-183.012	-189.247	-183.014	6.2331	ExM
239	-45.4245	-47.4723	-45.5627	1.9096	ExM
240	-242.465	-242.465	-268.941	-26.4759	ExM
241	-97.9555	-98.4621	-98.8781	-0.416	ExM
242	-156.143	-161.687	-156.147	5.5402	ExM
243	-110.073	-110.342	-111.516	-1.1735	ExM
244	-180.674	-182.06	-180.962	1.0978	ExM
245	-158.159	-163.88	-158.162	5.7177	ExM
246	-4.1933	-5.4276	-4.5372	0.8904	ExM
247	-127.863	-130.704	-127.923	2.7815	ExM
248	-5.3165	-5.5676	-6.8212	-1.2536	ExM
249	-338.432	-340.021	-338.661	1.36	ExM
250	-12.4006	-13.072	-13.1159	-0.0439	ExM
251	-424.256	-424.256	-437.185	-12.9289	ExM
252	-53.0235	-53.3231	-54.3747	-1.0516	ExM
253	-141.166	-144.384	-141.207	3.1771	ExM
254	-5.3165	-5.5676	-6.8212	-1.2536	ExM
255	-11.6926	-12.6481	-12.1781	0.47	ExM
256	-121.896	-123.924	-122.037	1.8871	ExM
257	-57.4876	-58.0309	-58.3571	-0.3262	ExM
258	-94.6699	-96.6659	-94.816	1.8499	ExM
259	-81.9942	-82.07	-84.6104	-2.5404	ExM
260	-24.3162	-24.4394	-26.4704	-2.031	ExM
261	-25.1368	-25.3176	-26.9363	-1.6187	ExM
262	-131.287	-132.762	-131.547	1.2146	ExM
263	-51.992	-52.0536	-54.8098	-2.7562	ExM
264	-14.8122	-14.8958	-17.3351	-2.4393	ExM
265	-5.6796	-5.7367	-8.5719	-2.8352	ExM
266	-10.3941	-11.9974	-10.6188	1.3786	ExM
267	-89.3952	-90.0617	-90.1158	-0.0541	ExM
268	-5.6625	-6.6103	-6.1528	0.4575	ExM
269	-134.318	-134.318	-143.225	-8.9064	ExM
270	-109.816	-118.652	-109.816	8.8366	ExM
271	-71.5255	-72.5236	-71.9853	0.5383	ExM
272	-28.0929	-29.3487	-28.4281	0.9206	ExM
273	-31.2181	-31.4487	-32.7985	-1.3498	ExM
274	-19.2579	-21.1002	-19.4304	1.6698	ExM
275	-12.0302	-12.6503	-12.8021	-0.1518	ExM
276	-4.6616	-5.3996	-5.3117	0.0879	ExM
277	-37.6512	-39.27	-37.872	1.398	ExM
278	-158.477	-158.477	-173.53	-15.0527	ExM
279	-209.983	-210.009	-213.632	-3.6225	ExM
280	-66.4799	-67.2733	-67.082	0.1913	ExM
281	-100.633	-103.284	-100.707	2.577	ExM
282	-79.7223	-80.128	-80.8205	-0.6925	ExM
283	-5.3165	-5.5676	-6.8212	-1.2536	ExM
284	-174.021	-174.219	-175.736	-1.5172	ExM
285	-4.1933	-5.4276	-4.5372	0.8904	ExM
286	-230.739	-230.739	-244.128	-13.3891	ExM
287	-393.211	-393.211	-415.075	-21.864	ExM
288	-313.047	-313.047	-329.459	-16.4119	ExM
289	-120.216	-120.223	-125.138	-4.9147	ExM
290	-364.135	-364.135	-393.642	-29.507	ExM
291	-298.715	-298.718	-304.448	-5.7294	ExM
292	-425.823	-433.954	-425.823	8.1308	ExM
293	-426.517	-426.517	-461.481	-34.964	ExM
294	-3.5729	-4.1059	-4.4568	-0.3509	ExM
295	-2.3806	-3.1753	-2.9816	0.1937	ExM
296	-560.197	-560.197	-620.512	-60.315	ExM
297	-300.871	-303.172	-300.977	2.1955	ExM
298	-9.404	-9.7068	-10.7463	-1.0395	ExM
299	-2.8927	-3.6697	-3.5086	0.1611	ExM
300	-172.871	-172.871	-181.484	-8.6124	ExM
301	-19.3192	-20.2401	-19.8269	0.4132	ExM
302	-172.663	-175.237	-172.742	2.4941	ExM
303	-145.06	-145.303	-146.594	-1.2907	ExM
304	-158.343	-158.343	-171.31	-12.9667	ExM
305	-36.6685	-38.3384	-36.8771	1.4613	ExM
306	-4.1892	-5.423	-4.5334	0.8896	ExM
307	-20.827	-22.8288	-20.9722	1.8566	ExM
308	-4.7908	-6.5366	-4.9826	1.554	ExM
309	-5.036	-6.1675	-5.4255	0.742	ExM
310	-11.5619	-12.4945	-12.062	0.4325	ExM
311	-5.596	-5.8921	-6.9575	-1.0654	ExM
312	-5.7404	-6.5057	-6.3662	0.1395	ExM
313	-5.3165	-5.5676	-6.8212	-1.2536	ExM
314	-13.7806	-13.8753	-16.1855	-2.3102	ExM
315	-5.0986	-6.7448	-5.3128	1.432	ExM
316	-14.3112	-14.8535	-15.182	-0.3285	ExM
317	-5.6796	-5.7367	-8.5719	-2.8352	ExM
318	-33.0008	-34.4497	-33.2684	1.1813	ExM
319	-5.1194	-5.5535	-6.163	-0.6095	ExM
320	-3.5022	-5.1347	-3.7197	1.415	ExM
321	-4.2624	-5.5336	-4.5915	0.9421	ExM
322	-5.5652	-5.9109	-6.7952	-0.8843	ExM
323	-4.6616	-5.3996	-5.3117	0.0879	ExM
324	-4.2624	-5.5336	-4.5915	0.9421	ExM
325	-63.2257	-63.4434	-64.8572	-1.4138	ExM
326	-11.8372	-13.4406	-12.0618	1.3788	ExM
327	-25.192	-27.6007	-25.2863	2.3144	ExM
328	-16.6862	-18.4613	-16.8718	1.5895	ExM
329	-17.6211	-17.9694	-18.8448	-0.8754	ExM
330	-6.0405	-6.2174	-7.8598	-1.6424	ExM
331	-5.5652	-5.9109	-6.7952	-0.8843	ExM
332	-60.8087	-63.5306	-60.8767	2.6539	ExM
333	-5.6625	-6.6103	-6.1528	0.4575	ExM
334	-5.596	-5.8921	-6.9575	-1.0654	ExM
335	-4.2624	-5.5336	-4.5915	0.9421	ExM
336	-4.7884	-6.5334	-4.9804	1.553	ExM
337	-4.2624	-5.5336	-4.5915	0.9421	ExM
338	-5.5932	-5.8893	-6.9546	-1.0653	ExM
339	-4.1933	-5.4276	-4.5372	0.8904	ExM
340	-3.5022	-5.1347	-3.7197	1.415	ExM
341	-26.1878	-27.5731	-26.4758	1.0973	ExM
342	-4.6594	-5.3972	-5.3099	0.0873	ExM
343	-3.5022	-5.1347	-3.7197	1.415	ExM
344	-6.0021	-7.2654	-6.3344	0.931	ExM
345	-11.6939	-13.2653	-11.9268	1.3385	ExM
346	-4.2624	-5.5336	-4.5915	0.9421	ExM
347	-4.9671	-6.5613	-5.1941	1.3672	ExM
348	-4.6616	-5.3996	-5.3117	0.0879	ExM
349	-6.0405	-6.2174	-7.8598	-1.6424	ExM
350	-6.0021	-7.2654	-6.3344	0.931	ExM
351	-4.9671	-6.5613	-5.1941	1.3672	ExM
352	-4.7908	-6.5366	-4.9826	1.554	ExM
353	-4.6616	-5.3996	-5.3117	0.0879	ExM
354	-5.6796	-5.7367	-8.5719	-2.8352	ExM
355	-6.0021	-7.2654	-6.3344	0.931	ExM
356	-5.596	-5.8921	-6.9575	-1.0654	ExM
357	-5.596	-5.8921	-6.9575	-1.0654	ExM
358	-6.0021	-7.2654	-6.3344	0.931	ExM
359	-5.036	-6.1675	-5.4255	0.742	ExM
360	-4.2624	-5.5336	-4.5915	0.9421	ExM
361	-5.2608	-6.019	-5.8929	0.1261	ExM
362	-4.2624	-5.5336	-4.5915	0.9421	ExM
363	-4.1933	-5.4276	-4.5372	0.8904	ExM
364	-5.2608	-6.019	-5.8929	0.1261	ExM
365	-6.6388	-7.741	-7.0426	0.6984	ExM
366	-5.6625	-6.6103	-6.1528	0.4575	ExM
367	-15.8284	-16.7697	-16.323	0.4467	ExM
368	-4.6616	-5.3996	-5.3117	0.0879	ExM
369	-3.5022	-5.1347	-3.7197	1.415	ExM
370	-4.9671	-6.5613	-5.1941	1.3672	ExM
371	-65.1709	-66.7449	-65.403	1.3419	ExM
372	-16.7802	-16.8763	-19.1701	-2.2938	ExM
373	-55.2954	-57.6196	-55.3984	2.2212	ExM
374	-12.6065	-13.8849	-12.9329	0.952	ExM
375	-5.7404	-6.5057	-6.3662	0.1395	ExM
376	-4.9671	-6.5613	-5.1941	1.3672	ExM
377	-4.2624	-5.5336	-4.5915	0.9421	ExM
378	-52.336	-52.4685	-54.4227	-1.9542	ExM
379	-5.036	-6.1675	-5.4255	0.742	ExM
380	-6.6388	-7.741	-7.0426	0.6984	ExM
381	-6.0405	-6.2174	-7.8598	-1.6424	ExM
382	-5.2608	-6.019	-5.8929	0.1261	ExM
383	-46.2505	-48.1337	-46.4155	1.7182	ExM
384	-84.0831	-84.5793	-85.0216	-0.4423	ExM
385	-5.596	-5.8921	-6.9575	-1.0654	ExM
386	-15.4773	-16.5408	-15.9008	0.64	ExM
387	-5.3165	-5.5676	-6.8212	-1.2536	ExM
388	-4.6616	-5.3996	-5.3117	0.0879	ExM
389	-4.6616	-5.3996	-5.3117	0.0879	ExM
390	-112.036	-116.555	-112.047	4.5089	ExM
391	-11.6336	-13.273	-11.8494	1.4236	ExM
392	-76.8552	-77.0932	-78.4074	-1.3142	ExM
393	-5.5652	-5.9109	-6.7952	-0.8843	ExM
394	-11.4676	-12.0139	-12.333	-0.3191	ExM
395	-5.5652	-5.9109	-6.7952	-0.8843	ExM
396	-5.2608	-6.019	-5.8929	0.1261	ExM
397	-4.6616	-5.3996	-5.3117	0.0879	ExM
398	-4.9671	-6.5613	-5.1941	1.3672	ExM
399	-4.2624	-5.5336	-4.5915	0.9421	ExM
400	-5.0986	-6.7448	-5.3128	1.432	ExM
401	-5.2608	-6.019	-5.8929	0.1261	ExM
402	-6.0021	-7.2654	-6.3344	0.931	ExM
403	-3.5022	-5.1347	-3.7197	1.415	ExM
404	-12.1544	-13.7443	-12.3825	1.3618	ExM
405	-5.2608	-6.019	-5.8929	0.1261	ExM
406	-6.0405	-6.2174	-7.8598	-1.6424	ExM
407	-16.6291	-16.6986	-19.33	-2.6314	ExM
408	-5.596	-5.8921	-6.9575	-1.0654	ExM
409	-19.6666	-21.7575	-19.7985	1.959	ExM
410	-5.596	-5.8921	-6.9575	-1.0654	ExM
411	-5.2608	-6.019	-5.8929	0.1261	ExM
412	-20.5905	-21.0516	-21.5864	-0.5348	ExM
413	-11.2098	-12.7615	-11.448	1.3135	ExM
414	-4.7908	-6.5366	-4.9826	1.554	ExM
415	-14.8921	-15.0477	-16.8289	-1.7812	ExM
416	-13.3554	-13.8488	-14.2985	-0.4497	ExM
417	-12.1703	-13.4583	-12.493	0.9653	ExM
418	-4.2624	-5.5336	-4.5915	0.9421	ExM
419	-4.2624	-5.5336	-4.5915	0.9421	ExM
420	-13.9324	-14.6528	-14.599	0.0538	ExM
421	-16.3448	-16.5595	-17.9887	-1.4292	ExM
422	-4.6616	-5.3996	-5.3117	0.0879	ExM
423	-161.222	-164.922	-161.247	3.675	ExM
424	-14.1012	-14.6218	-15.003	-0.3812	ExM
425	-5.6625	-6.6103	-6.1528	0.4575	ExM
426	-5.5652	-5.9109	-6.7952	-0.8843	ExM
427	-5.7404	-6.5057	-6.3662	0.1395	ExM
428	-5.036	-6.1675	-5.4255	0.742	ExM
429	-5.7404	-6.5057	-6.3662	0.1395	ExM
430	-20.9013	-21.8065	-21.4196	0.3869	ExM
431	-6.6388	-7.741	-7.0426	0.6984	ExM
432	-189.777	-192.586	-189.839	2.7472	ExM
433	-5.6625	-6.6103	-6.1528	0.4575	ExM
434	-25.8417	-26.4787	-26.5944	-0.1157	ExM
435	-137.512	-140.604	-137.559	3.0455	ExM
436	-35.9535	-37.0098	-36.3807	0.6291	ExM
437	-5.3165	-5.5676	-6.8212	-1.2536	ExM
438	-5.3165	-5.5676	-6.8212	-1.2536	ExM
439	-5.1192	-5.5533	-6.1628	-0.6095	ExM
440	-4.6616	-5.3996	-5.3117	0.0879	ExM
441	-12.2668	-13.949	-12.4725	1.4765	ExM
442	-16.0755	-16.2198	-18.0827	-1.8629	ExM
443	-5.7404	-6.5057	-6.3662	0.1395	ExM
444	-6.0021	-7.2654	-6.3344	0.931	ExM
445	-4.7908	-6.5366	-4.9826	1.554	ExM
446	-5.2608	-6.019	-5.8929	0.1261	ExM
447	-6.6388	-7.741	-7.0426	0.6984	ExM
448	-31.1713	-31.5552	-32.3143	-0.7591	ExM
449	-12.5394	-13.9031	-12.8347	1.0684	ExM
450	-6.0405	-6.2174	-7.8598	-1.6424	ExM
451	-19.0736	-19.462	-20.2071	-0.7451	ExM
452	-16.1963	-16.8825	-16.8964	-0.0139	ExM
453	-14.2653	-14.4563	-16.015	-1.5587	ExM
454	-5.6796	-5.7367	-8.5719	-2.8352	ExM
455	-4.9671	-6.5613	-5.1941	1.3672	ExM
456	-5.6625	-6.6103	-6.1528	0.4575	ExM
457	-4.7908	-6.5366	-4.9826	1.554	ExM
458	-5.2608	-6.019	-5.8929	0.1261	ExM
459	-5.036	-6.1675	-5.4255	0.742	ExM
460	-4.9671	-6.5613	-5.1941	1.3672	ExM
461	-5.2608	-6.019	-5.8929	0.1261	ExM
462	-4.2624	-5.5336	-4.5915	0.9421	ExM
463	-6.0021	-7.2654	-6.3344	0.931	ExM
464	-24.8582	-25.2385	-26.0089	-0.7704	ExM
465	-5.6796	-5.7367	-8.5719	-2.8352	ExM
466	-5.6796	-5.7367	-8.5719	-2.8352	ExM
467	-5.6625	-6.6103	-6.1528	0.4575	ExM
468	-13.4852	-13.921	-14.5256	-0.6046	ExM
469	-6.0405	-6.2174	-7.8598	-1.6424	ExM
470	-15.5	-16.541	-15.9355	0.6055	ExM
471	-4.6616	-5.3996	-5.3117	0.0879	ExM
472	-6.0405	-6.2174	-7.8598	-1.6424	ExM
473	-11.925	-13.2033	-12.2514	0.9519	ExM
474	-22.8804	-23.2823	-23.9862	-0.7039	ExM
475	-17.7859	-18.9151	-18.1763	0.7388	ExM
476	-76.536	-79.9628	-76.5691	3.3937	ExM
477	-4.1933	-5.4276	-4.5372	0.8904	ExM
478	-5.596	-5.8921	-6.9575	-1.0654	ExM
479	-55.0411	-55.1972	-56.9755	-1.7783	ExM
480	-234.736	-240.044	-234.741	5.3034	ExM
481	-5.036	-6.1675	-5.4255	0.742	ExM
482	-20.1885	-20.5162	-21.4634	-0.9472	ExM
483	-134.338	-136.89	-134.42	2.47	ExM
484	-68.5773	-72.1595	-68.6055	3.554	ExM
485	-5.3165	-5.5676	-6.8212	-1.2536	ExM
486	-5.6796	-5.7367	-8.5719	-2.8352	ExM
487	-80.3445	-80.6971	-81.5581	-0.861	ExM
488	-243.588	-249.07	-243.592	5.4778	ExM
489	-391.723	-391.723	-427.855	-36.1324	ExM
490	-160.778	-160.778	-177.237	-16.4584	ExM
491	-91.0842	-91.1854	-93.425	-2.2396	ExM
492	-70.8628	-71.8728	-71.3157	0.5571	ExM
493	-69.7756	-70.1624	-70.9126	-0.7502	ExM
494	-210.576	-210.62	-213.715	-3.0948	ExM
495	-405.615	-405.615	-425.521	-19.9059	ExM
496	-38.2725	-39.0412	-38.8954	0.1458	ExM
497	-5.596	-5.8921	-6.9575	-1.0654	ExM
498	-112.502	-115.496	-112.554	2.9423	ExM
499	-5.1194	-5.5535	-6.163	-0.6095	ExM
500	-4.1933	-5.4276	-4.5372	0.8904	ExM
501	-56.5262	-58.3184	-56.7084	1.61	ExM
502	-58.474	-58.8802	-59.571	-0.6908	ExM
503	-4.2624	-5.5336	-4.5915	0.9421	ExM
504	-13.0114	-14.93	-13.1702	1.7598	ExM
505	-4.6616	-5.3996	-5.3117	0.0879	ExM
506	-4.6616	-5.3996	-5.3117	0.0879	ExM
507	-4.6616	-5.3996	-5.3117	0.0879	ExM
508	-64.8564	-64.9634	-67.1441	-2.1807	ExM
509	-5.7404	-6.5057	-6.3662	0.1395	ExM
510	-5.2608	-6.019	-5.8929	0.1261	ExM
511	-4.7884	-6.5334	-4.9804	1.553	ExM
512	-11.7759	-12.088	-13.0924	-1.0044	ExM
513	-22.8062	-23.2667	-23.8031	-0.5364	ExM
514	-4.6616	-5.3996	-5.3117	0.0879	ExM
515	-58.4524	-59.0114	-59.3004	-0.289	ExM
516	-43.8524	-45.5208	-44.0613	1.4595	ExM
517	-12.9506	-14.06	-13.3508	0.7092	ExM
518	-5.5652	-5.9109	-6.7952	-0.8843	ExM
519	-143.848	-144.199	-145.065	-0.8655	ExM
520	-3.7333	-4.0453	-5.0501	-1.0048	ExM
521	-2.3806	-3.1753	-2.9816	0.1937	ExM
522	-23.4827	-23.5047	-27.3127	-3.808	ExM
523	-5.1194	-5.5535	-6.163	-0.6095	ExM
524	-88.9621	-89.3077	-90.1924	-0.8847	ExM
525	-26.2662	-26.7892	-27.1645	-0.3753	ExM
526	-5.596	-5.8921	-6.9575	-1.0654	ExM
527	-106.778	-106.779	-114.475	-7.6966	ExM
528	-129.838	-133.819	-129.857	3.9625	ExM
529	-15.0936	-15.1773	-17.6163	-2.439	ExM
530	-200.703	-213.705	-200.703	13.0022	ExM
531	-71.3437	-71.3808	-74.658	-3.2772	ExM
532	-11.4585	-13.0102	-11.6966	1.3136	ExM
533	-13.8955	-14.1055	-15.5596	-1.4541	ExM
534	-6.0405	-6.2174	-7.8598	-1.6424	ExM
535	-11.122	-12.3999	-11.4486	0.9513	ExM
536	-42.4094	-46.475	-42.4267	4.0483	ExM
537	-13.2089	-13.6448	-14.2494	-0.6046	ExM
538	-4.6616	-5.3996	-5.3117	0.0879	ExM
539	-12.7483	-13.945	-13.1082	0.8368	ExM
540	-6.0021	-7.2654	-6.3344	0.931	ExM
541	-5.1194	-5.5535	-6.163	-0.6095	ExM
542	-5.1194	-5.5535	-6.163	-0.6095	ExM
543	-3.5022	-5.1347	-3.7197	1.415	ExM
544	-157.16	-157.344	-158.942	-1.5978	ExM
545	-75.4631	-75.4634	-83.899	-8.4356	ExM
546	-4.7908	-6.5366	-4.9826	1.554	ExM
547	-5.7404	-6.5057	-6.3662	0.1395	ExM
548	-6.0405	-6.2174	-7.8598	-1.6424	ExM
549	-13.1007	-13.746	-13.8441	-0.0981	ExM
550	-147.424	-148.97	-147.663	1.3068	ExM
551	-33.3567	-33.6614	-34.6937	-1.0323	ExM
552	-3.5022	-5.1347	-3.7197	1.415	ExM
553	-103.85	-104.239	-104.982	-0.7435	ExM
554	-19.4965	-20.5536	-19.9234	0.6302	ExM
555	-152.308	-152.377	-155.017	-2.6407	ExM
556	-53.3116	-53.5466	-54.8754	-1.3288	ExM
557	-67.6166	-68.6967	-68.0315	0.6652	ExM
558	-90.2767	-90.2768	-100.836	-10.5596	ExM
559	-13.3553	-14.6436	-13.6779	0.9657	ExM
560	-21.7711	-21.8521	-24.3243	-2.4722	ExM
561	-84.0328	-87.563	-84.0626	3.5004	ExM
562	-123.229	-124.581	-123.528	1.053	ExM
563	-13.2709	-13.59	-14.5685	-0.9785	ExM
564	-5.0986	-6.7448	-5.3128	1.432	ExM
565	-3.5022	-5.1347	-3.7197	1.415	ExM
566	-5.6625	-6.6103	-6.1528	0.4575	ExM
567	-31.7321	-33.5076	-31.9177	1.5899	ExM
568	-24.8737	-24.9793	-27.1747	-2.1954	ExM
569	-13.36	-13.5157	-15.2966	-1.7809	ExM
570	-24.8158	-25.055	-26.3637	-1.3087	ExM
571	-149.073	-155.479	-149.075	6.4039	ExM
572	-74.6221	-74.6246	-80.5936	-5.969	ExM
573	-34.3009	-34.5526	-35.8037	-1.2511	ExM
574	-4.6616	-5.3996	-5.3117	0.0879	ExM
575	-49.0899	-51.3048	-49.2055	2.0993	ExM
576	-31.1889	-33.5078	-31.2925	2.2153	ExM
577	-5.2579	-6.0162	-5.8899	0.1263	ExM
578	-35.5473	-38.1516	-35.6241	2.5275	ExM
579	-5.3165	-5.5676	-6.8212	-1.2536	ExM
580	-4.9671	-6.5613	-5.1941	1.3672	ExM
581	-5.0986	-6.7448	-5.3128	1.432	ExM
582	-4.2624	-5.5336	-4.5915	0.9421	ExM
583	-35.1769	-35.1815	-40.5552	-5.3737	ExM
584	-5.5652	-5.9109	-6.7952	-0.8843	ExM
585	-4.1933	-5.4276	-4.5372	0.8904	ExM
586	-5.6625	-6.6103	-6.1528	0.4575	ExM
587	-4.1926	-5.4268	-4.5366	0.8902	ExM
588	-243.571	-243.571	-257.23	-13.6591	ExM
589	-5.661	-6.6085	-6.1516	0.4569	ExM
590	-15.0628	-15.3822	-16.3597	-0.9775	ExM
591	-5.661	-6.6085	-6.1516	0.4569	ExM
592	-20.365	-20.8258	-21.3613	-0.5355	ExM
593	-6.0394	-6.2163	-7.8587	-1.6424	ExM
594	-90.6613	-94.91	-90.6757	4.2343	ExM
595	-39.972	-40.0287	-42.8693	-2.8406	ExM
596	-110.929	-110.929	-120.052	-9.1222	ExM
597	-24.228	-26.6805	-24.318	2.3625	ExM
598	-168.084	-169.942	-168.254	1.6879	ExM
599	-19.8133	-21.116	-20.1305	0.9855	ExM
600	-13.4235	-13.5793	-15.3601	-1.7808	ExM
601	-21.81	-22.3666	-22.6614	-0.2948	ExM
602	-5.6625	-6.6103	-6.1528	0.4575	ExM
603	-18.0633	-18.2141	-20.0295	-1.8154	ExM
604	-330.212	-333.647	-330.245	3.4025	ExM
605	-17.0521	-17.5427	-17.9993	-0.4566	ExM
606	-29.0391	-29.6499	-29.8221	-0.1722	ExM
607	-309.849	-309.849	-319.691	-9.8415	ExM
608	-148.927	-148.927	-168.267	-19.34	ExM
609	-3.5022	-5.1347	-3.7197	1.415	ExM
610	-155.539	-158.468	-155.594	2.8738	ExM
611	-386.175	-386.175	-419.971	-33.7958	ExM
612	-4.2624	-5.5336	-4.5915	0.9421	ExM
613	-77.2832	-79.982	-77.3529	2.6291	ExM
614	-27.4868	-28.5046	-27.9352	0.5694	ExM
615	-5.6796	-5.7367	-8.5719	-2.8352	ExM
616	-3.5001	-5.1321	-3.7177	1.4144	ExM
617	-3.5022	-5.1347	-3.7197	1.415	ExM
618	-19.4639	-19.6973	-21.0333	-1.336	ExM
619	-34.9454	-36.2668	-35.2557	1.0111	ExM
620	-15.3455	-15.5602	-16.9893	-1.4291	ExM
621	-37.4186	-38.0896	-38.1344	-0.0448	ExM
622	-18.7706	-18.7778	-23.7128	-4.935	ExM
623	-159.389	-160.977	-159.618	1.3589	ExM
624	-195.326	-196.341	-195.776	0.5657	ExM
625	-207.704	-209.49	-207.887	1.6024	ExM
626	-4.6616	-5.3996	-5.3117	0.0879	ExM
627	-64.8251	-67.6391	-64.8869	2.7522	ExM
628	-123.465	-124.012	-124.329	-0.3171	ExM
629	-11.0862	-11.9526	-11.6318	0.3208	ExM
630	-139.525	-139.525	-151.882	-12.3575	ExM
631	-129.743	-136.999	-129.743	7.2552	ExM
632	-14.6291	-14.7227	-17.0449	-2.3222	ExM
633	-166.276	-166.681	-167.376	-0.6951	ExM
634	-11.8648	-13.4363	-12.0976	1.3387	ExM
635	-127.034	-128.198	-127.408	0.7895	ExM
636	-5.2608	-6.019	-5.8929	0.1261	ExM
637	-4.9671	-6.5613	-5.1941	1.3672	ExM
638	-218.265	-218.265	-229.558	-11.2933	ExM
639	-6.0405	-6.2174	-7.8598	-1.6424	ExM
640	-6.6388	-7.741	-7.0426	0.6984	ExM
641	-19.9883	-22.1221	-20.1143	2.0078	ExM
642	-5.7404	-6.5057	-6.3662	0.1395	ExM
643	-12.9821	-14.2757	-13.3027	0.973	ExM
644	-4.1933	-5.4276	-4.5372	0.8904	ExM
645	-63.5431	-65.074	-63.7868	1.2872	ExM
646	-177.364	-178.6	-177.707	0.8929	ExM
647	-4.6616	-5.3996	-5.3117	0.0879	ExM
648	-115.347	-117.269	-115.505	1.7635	ExM
649	-3.5022	-5.1347	-3.7197	1.415	ExM
650	-4.2624	-5.5336	-4.5915	0.9421	ExM
651	-44.5822	-45.717	-44.97	0.747	ExM
652	-5.3165	-5.5676	-6.8212	-1.2536	ExM
653	-13.4767	-14.3134	-14.0444	0.269	ExM
654	-6.0405	-6.2174	-7.8598	-1.6424	ExM
655	-4.9671	-6.5613	-5.1941	1.3672	ExM
656	-30.7677	-32.4057	-30.9839	1.4218	ExM
657	-4.6616	-5.3996	-5.3117	0.0879	ExM
658	-4.2606	-5.5318	-4.5898	0.942	ExM
659	-5.6778	-5.7348	-8.5694	-2.8346	ExM
660	-3.5001	-5.1321	-3.7177	1.4144	ExM
661	-5.596	-5.8921	-6.9575	-1.0654	ExM
662	-14.9206	-15.0042	-17.4434	-2.4392	ExM
663	-49.6971	-50.4309	-50.3512	0.0797	ExM
664	-34.8379	-36.8951	-34.9747	1.9204	ExM
665	-31.5529	-33.5698	-31.6957	1.8741	ExM
666	-127.839	-130.542	-127.909	2.6335	ExM
667	-125.324	-130.9	-125.328	5.5729	ExM
668	-171.315	-171.315	-187.522	-16.2076	ExM
669	-5.6796	-5.7367	-8.5719	-2.8352	ExM
670	-33.0125	-33.9901	-33.4844	0.5057	ExM
671	-4.2624	-5.5336	-4.5915	0.9421	ExM
672	-178.238	-180.473	-178.352	2.1213	ExM
673	-84.1439	-86.6002	-84.2336	2.3666	ExM
674	-21.8199	-23.5012	-22.0258	1.4754	ExM
675	-4.2624	-5.5336	-4.5915	0.9421	ExM
676	-5.5652	-5.9109	-6.7952	-0.8843	ExM
677	-7.132	-8.5423	-7.4118	1.1305	ExM
678	-5.036	-6.1675	-5.4255	0.742	ExM
679	-5.1194	-5.5535	-6.163	-0.6095	ExM
680	-5.0986	-6.7448	-5.3128	1.432	ExM
681	-7.132	-8.5423	-7.4118	1.1305	ExM
682	-4.2624	-5.5336	-4.5915	0.9421	ExM
683	-25.335	-26.5223	-25.6988	0.8235	ExM
684	-13.4081	-13.843	-14.4504	-0.6074	ExM
685	-5.7404	-6.5057	-6.3662	0.1395	ExM
686	-5.036	-6.1675	-5.4255	0.742	ExM
687	-76.847	-81.5925	-76.8557	4.7368	ExM
688	-6.0021	-7.2654	-6.3344	0.931	ExM
689	-4.6616	-5.3996	-5.3117	0.0879	ExM
690	-11.8393	-13.306	-12.1015	1.2045	ExM
691	-6.6388	-7.741	-7.0426	0.6984	ExM
692	-25.6745	-27.1261	-25.9414	1.1847	ExM
693	-5.1194	-5.5535	-6.163	-0.6095	ExM
694	-75.0732	-81.4117	-75.0749	6.3368	ExM
695	-191.344	-192.556	-191.697	0.8585	ExM
696	-19.5679	-20.1526	-20.3827	-0.2301	ExM
697	-12.6452	-14.5617	-12.8044	1.7573	ExM
698	-340.591	-340.591	-364.605	-24.0139	ExM
699	-262.195	-269.431	-262.196	7.2356	ExM
700	-4.7908	-6.5366	-4.9826	1.554	ExM
701	-18.4943	-18.7312	-20.0505	-1.3193	ExM
702	-390.917	-414.703	-390.917	23.7864	ExM
703	-4.1929	-5.4272	-4.5369	0.8903	ExM
704	-73.2378	-76.168	-73.2927	2.8753	ExM
705	-158.756	-163.665	-158.764	4.9013	ExM
706	-169.309	-169.582	-170.742	-1.16	ExM
707	-213.975	-225.928	-213.975	11.953	ExM
708	-202.605	-202.605	-212.429	-9.8246	ExM
709	-86.0451	-86.122	-88.6482	-2.5262	ExM
710	-29.9622	-30.3027	-31.2048	-0.9021	ExM
711	-3.3362	-4.2766	-3.8312	0.4454	ExM
712	-6.0725	-6.9201	-6.632	0.2881	ExM
713	-1.6804	-3.0618	-1.9697	1.0921	ExM
714	-6.0021	-7.2654	-6.3344	0.931	ExM
715	-4.6616	-5.3996	-5.3117	0.0879	ExM
716	-5.5652	-5.9109	-6.7952	-0.8843	ExM
717	-3.5022	-5.1347	-3.7197	1.415	ExM
718	-13.7	-13.7961	-16.0897	-2.2936	ExM
719	-4.6616	-5.3996	-5.3117	0.0879	ExM
720	-338.528	-344.263	-338.531	5.7321	ExM
721	-5.5652	-5.9109	-6.7952	-0.8843	ExM
722	-4.6616	-5.3996	-5.3117	0.0879	ExM
723	-5.3159	-5.5671	-6.8207	-1.2536	ExM
724	-191.214	-204.869	-191.214	13.6551	ExM
725	-102.811	-102.852	-106.043	-3.1913	ExM
726	-371.476	-371.512	-374.817	-3.3049	ExM
727	-81.3201	-82.1144	-81.9214	0.193	ExM
728	-436.398	-436.398	-445.406	-9.0078	ExM
729	-446.891	-446.891	-494.729	-47.8382	ExM
730	-258.958	-258.958	-274.4	-15.4423	ExM
731	-25.2857	-25.6619	-26.4455	-0.7836	ExM
732	-443.112	-443.112	-492.832	-49.7202	ExM
733	-132.459	-133.055	-133.259	-0.2041	ExM
734	-410.434	-411.396	-410.915	0.4807	ExM
735	-328.492	-330.798	-328.597	2.2005	ExM
736	-152.256	-152.345	-154.723	-2.3778	ExM
737	-491.446	-491.446	-544.157	-52.7109	ExM
738	-578.621	-578.621	-634.005	-55.3839	ExM
739	-552.024	-552.024	-592.867	-40.8432	ExM
740	-17.6234	-17.8811	-19.1053	-1.2242	ExM
741	-29.176	-29.4118	-30.7361	-1.3243	ExM
742	-383.23	-383.23	-409.809	-26.5784	ExM
743	-427.178	-427.178	-463.459	-36.281	ExM
744	-266.031	-266.031	-273.678	-7.6461	ExM
745	-246.582	-246.582	-269.87	-23.2887	ExM
746	-369.224	-369.224	-400.179	-30.9549	ExM
747	-167.359	-167.474	-169.579	-2.1051	ExM
748	-4.1933	-5.4276	-4.5372	0.8904	ExM
749	-394.035	-394.035	-431.735	-37.7001	ExM
750	-4.1933	-5.4276	-4.5372	0.8904	ExM
751	-4.6616	-5.3996	-5.3117	0.0879	ExM
752	-4.1933	-5.4276	-4.5372	0.8904	ExM
753	-119.827	-119.892	-122.595	-2.7038	ExM
754	-15.5981	-16.6846	-16.0097	0.6749	ExM
755	-83.9036	-83.9062	-89.8479	-5.9417	ExM
756	-1.6804	-3.0618	-1.9697	1.0921	ExM
757	-2.3806	-3.1753	-2.9816	0.1937	ExM
758	-3.0901	-4.1588	-3.5108	0.648	ExM
759	-3.4432	-3.7506	-4.7723	-1.0217	ExM
760	-62.148	-65.5174	-62.1831	3.3343	ExM
761	-123.912	-124.348	-124.952	-0.6039	ExM
762	-36.2146	-38.4739	-36.3248	2.1491	ExM
763	-4.7901	-6.5357	-4.982	1.5537	ExM
764	-33.9682	-33.9808	-38.3488	-4.368	ExM
765	-5.5652	-5.9109	-6.7952	-0.8843	ExM
766	-4.7908	-6.5366	-4.9826	1.554	ExM
767	-185.392	-196.8	-185.392	11.4082	ExM
768	-65.5933	-65.8323	-67.1417	-1.3094	ExM
769	-325.548	-340.691	-325.548	15.1431	ExM
770	-175.475	-177.068	-175.702	1.3662	ExM
771	-405.057	-405.057	-429.055	-23.9987	ExM
772	-200.158	-200.158	-213.914	-13.7564	ExM
773	-24.2306	-24.2325	-30.5185	-6.286	ExM
774	-4.1932	-5.4275	-4.5371	0.8904	ExM
775	-281.837	-290.802	-281.837	8.9648	ExM
776	-205.23	-205.23	-238.593	-33.3625	ExM
777	-124.504	-124.895	-125.632	-0.7365	ExM
778	-5.6796	-5.7367	-8.5719	-2.8352	ExM
779	-168.231	-180.282	-168.231	12.0508	ExM
780	-139.805	-144.659	-139.812	4.8463	ExM
781	-64.862	-67.0886	-64.9762	2.1124	ExM
782	-101.947	-108.109	-101.949	6.1597	ExM
783	-22.2742	-22.5662	-23.6474	-1.0812	ExM
784	-213.714	-213.715	-221.474	-7.7589	ExM
785	-13.6762	-14.7041	-14.1191	0.585	ExM
786	-390.537	-390.537	-400.321	-9.784	ExM
787	-356.795	-366.345	-356.795	9.5495	ExM
788	-265.813	-265.813	-277.355	-11.5423	ExM
789	-105.063	-105.392	-106.336	-0.9436	ExM
790	-206.907	-209.152	-207.019	2.133	ExM
791	-46.4832	-47.9351	-46.7499	1.1852	ExM
792	-5.3165	-5.5676	-6.8212	-1.2536	ExM
793	-13.5373	-13.9349	-14.6519	-0.717	ExM
794	-33.3551	-35.7672	-33.449	2.3182	ExM
795	-39.7851	-41.4464	-39.9957	1.4507	ExM
796	-432.604	-432.604	-446.444	-13.8395	ExM
797	-26.6263	-27.0623	-27.6666	-0.6043	ExM
798	-28.9356	-31.2638	-29.0382	2.2256	ExM
799	-200.612	-200.612	-225.063	-24.4511	ExM
800	-90.4712	-90.5202	-93.5126	-2.9924	ExM
801	-365.061	-365.061	-383.81	-18.749	ExM
802	-24.5864	-26.6638	-24.7202	1.9436	ExM
803	-5.7404	-6.5057	-6.3662	0.1395	ExM
804	-12.8251	-13.1262	-14.1723	-1.0461	ExM
805	-4.6616	-5.3996	-5.3117	0.0879	ExM
806	-5.6625	-6.6103	-6.1528	0.4575	ExM
807	-5.2608	-6.019	-5.8929	0.1261	ExM
808	-20.1575	-21.781	-20.3771	1.4039	ExM
809	-5.2608	-6.019	-5.8929	0.1261	ExM
810	-4.6616	-5.3996	-5.3117	0.0879	ExM
811	-5.2608	-6.019	-5.8929	0.1261	ExM
812	-5.2608	-6.019	-5.8929	0.1261	ExM
813	-13.6215	-13.6432	-17.4612	-3.818	ExM
814	-35.9988	-36.1237	-38.1414	-2.0177	ExM
815	-31.5568	-31.5696	-35.922	-4.3524	ExM
816	-22.6143	-24.84	-22.7285	2.1115	ExM
817	-52.5769	-53.2775	-53.2627	0.0148	ExM
818	-450.281	-456.614	-450.283	6.3307	ExM
819	-71.6033	-72.6689	-72.0257	0.6432	ExM
820	-10.6935	-12.3434	-10.9068	1.4366	ExM
821	-157.151	-170.314	-157.151	13.1626	ExM
822	-5.7404	-6.5057	-6.3662	0.1395	ExM
823	-19.1486	-21.1968	-19.2866	1.9102	ExM
824	-3.5022	-5.1347	-3.7197	1.415	ExM
825	-24.4788	-25.7223	-24.819	0.9033	ExM
826	-5.1194	-5.5535	-6.163	-0.6095	ExM
827	-4.2624	-5.5336	-4.5915	0.9421	ExM
828	-5.2608	-6.019	-5.8929	0.1261	ExM
829	-4.6616	-5.3996	-5.3117	0.0879	ExM
830	-26.8516	-27.5475	-27.5421	0.0054	ExM
831	-190.717	-199.031	-190.717	8.3139	ExM
832	-3.5022	-5.1347	-3.7197	1.415	ExM
833	-5.6796	-5.7367	-8.5719	-2.8352	ExM
834	-3.5022	-5.1347	-3.7197	1.415	ExM
835	-11.0794	-12.0116	-11.5798	0.4318	ExM
836	-11.0099	-12.2877	-11.3365	0.9512	ExM
837	-5.596	-5.8921	-6.9575	-1.0654	ExM
838	-13.1779	-14.7825	-13.4023	1.3802	ExM
839	-5.2608	-6.019	-5.8929	0.1261	ExM
840	-16.8069	-17.3554	-17.6693	-0.3139	ExM
841	-4.2624	-5.5336	-4.5915	0.9421	ExM
842	-16.5776	-17.1145	-17.4559	-0.3414	ExM
843	-343.234	-360.14	-343.234	16.9057	ExM
844	-59.3523	-62.0389	-59.4229	2.616	ExM
845	-48.2539	-49.5755	-48.5641	1.0114	ExM
846	-364.91	-371.348	-364.912	6.4364	ExM
847	-382.082	-382.086	-387.487	-5.4007	ExM
848	-16.5442	-17.6287	-16.9568	0.6719	ExM
849	-15.0529	-16.6562	-15.2776	1.3786	ExM
850	-3.5022	-5.1347	-3.7197	1.415	ExM
851	-34.3683	-35.5683	-34.7267	0.8416	ExM
852	-3.5022	-5.1347	-3.7197	1.415	ExM
853	-5.6625	-6.6103	-6.1528	0.4575	ExM
854	-3.5022	-5.1347	-3.7197	1.415	ExM
855	-5.5652	-5.9109	-6.7952	-0.8843	ExM
856	-26.4952	-26.9416	-27.5166	-0.575	ExM
857	-5.596	-5.8921	-6.9575	-1.0654	ExM
858	-41.6224	-43.7295	-41.752	1.9775	ExM
859	-6.0021	-7.2654	-6.3344	0.931	ExM
860	-84.2631	-85.0548	-84.8665	0.1883	ExM
861	-5.7404	-6.5057	-6.3662	0.1395	ExM
862	-5.5652	-5.9109	-6.7952	-0.8843	ExM
863	-19.0771	-20.4685	-19.3631	1.1054	ExM
864	-5.7404	-6.5057	-6.3662	0.1395	ExM
865	-38.0908	-38.1325	-41.2875	-3.155	ExM
866	-55.8382	-58.6203	-55.9021	2.7182	ExM
867	-15.713	-16.5222	-16.3021	0.2201	ExM
868	-49.9724	-53.6085	-49.9991	3.6094	ExM
869	-15.1002	-16.5353	-15.3721	1.1632	ExM
870	-23.8834	-23.9074	-27.628	-3.7206	ExM
871	-4.6616	-5.3996	-5.3117	0.0879	ExM
872	-13.1635	-13.8099	-13.9056	-0.0957	ExM
873	-13.589	-14.2343	-14.3323	-0.098	ExM
874	-278.872	-279.527	-279.605	-0.0784	ExM
875	-5.6796	-5.7367	-8.5719	-2.8352	ExM
876	-6.0405	-6.2174	-7.8598	-1.6424	ExM
877	-128.861	-132.382	-128.891	3.4916	ExM
878	-162.004	-163.824	-162.18	1.6441	ExM
879	-5.6796	-5.7367	-8.5719	-2.8352	ExM
880	-5.1194	-5.5535	-6.163	-0.6095	ExM
881	-207.534	-208.114	-208.355	-0.2412	ExM
882	-5.2608	-6.019	-5.8929	0.1261	ExM
883	-12.1749	-13.7266	-12.413	1.3136	ExM
884	-12.8166	-13.2143	-13.9309	-0.7166	ExM
885	-4.2624	-5.5336	-4.5915	0.9421	ExM
886	-16.6877	-16.832	-18.6948	-1.8628	ExM
887	-16.8607	-17.005	-18.8679	-1.8629	ExM
888	-5.2608	-6.019	-5.8929	0.1261	ExM
889	-89.1896	-89.5187	-90.4609	-0.9422	ExM
890	-162.998	-162.998	-178.137	-15.1389	ExM
891	-21.9969	-22.7416	-22.641	0.1006	ExM
892	-17.2069	-17.4928	-18.5987	-1.1059	ExM
893	-25.7816	-25.8792	-28.1576	-2.2784	ExM
894	-11.6429	-12.9588	-11.9552	1.0036	ExM
895	-3.5022	-5.1347	-3.7197	1.415	ExM
896	-5.6796	-5.7367	-8.5719	-2.8352	ExM
897	-5.6625	-6.6103	-6.1528	0.4575	ExM
898	-5.7404	-6.5057	-6.3662	0.1395	ExM
899	-12.5883	-13.0241	-13.6288	-0.6047	ExM
900	-5.036	-6.1675	-5.4255	0.742	ExM
901	-3.5022	-5.1347	-3.7197	1.415	ExM
902	-151.846	-168.656	-151.846	16.8098	ExM
903	-4.6616	-5.3996	-5.3117	0.0879	ExM
904	-5.2608	-6.019	-5.8929	0.1261	ExM
905	-13.6996	-14.0161	-15.0039	-0.9878	ExM
906	-14.5786	-15.2472	-15.297	-0.0498	ExM
907	-3.5022	-5.1347	-3.7197	1.415	ExM
908	-4.2624	-5.5336	-4.5915	0.9421	ExM
909	-66.4121	-67.283	-66.9544	0.3286	ExM
910	-53.2387	-53.337	-55.6076	-2.2706	ExM
911	-15.4452	-16.8149	-15.7384	1.0765	ExM
912	-4.6616	-5.3996	-5.3117	0.0879	ExM
913	-4.6616	-5.3996	-5.3117	0.0879	ExM
914	-225.066	-229.436	-225.078	4.3576	ExM
915	-4.2624	-5.5336	-4.5915	0.9421	ExM
916	-60.2184	-63.1361	-60.274	2.8621	ExM
917	-251.851	-252.467	-252.627	-0.1599	ExM
918	-13.5059	-13.9516	-14.5285	-0.5769	ExM
919	-37.2481	-39.3064	-37.3847	1.9217	ExM
920	-131.196	-131.196	-150.714	-19.5184	ExM
921	-4.6609	-5.3988	-5.3111	0.0877	ExM
922	-5.7404	-6.5057	-6.3662	0.1395	ExM
923	-15.4665	-15.6107	-17.4738	-1.8631	ExM
924	-63.8273	-64.406	-64.6497	-0.2437	ExM
925	-5.0986	-6.7448	-5.3128	1.432	ExM
926	-90.0394	-90.1995	-91.9502	-1.7507	ExM
927	-71.6263	-73.5788	-71.7793	1.7995	ExM
928	-284.255	-284.995	-284.903	0.0918	ExM
929	-239.994	-239.994	-247.807	-7.8124	ExM
930	-65.8321	-65.8321	-82.4955	-16.6634	ExM
931	-62.182	-63.2699	-62.5928	0.6771	ExM
932	-39.7617	-40.2145	-40.7719	-0.5574	ExM
933	-5.1194	-5.5535	-6.163	-0.6095	ExM
934	-5.6625	-6.6103	-6.1528	0.4575	ExM
935	-103.47	-103.473	-109.365	-5.892	ExM
936	-37.9772	-38.0445	-40.7092	-2.6647	ExM
937	-62.6503	-63.7513	-63.0546	0.6967	ExM
938	-89.8384	-89.8451	-94.8344	-4.9893	ExM
939	-11.545	-13.0966	-11.7831	1.3135	ExM
940	-27.3828	-28.093	-28.0592	0.0338	ExM
941	-12.3135	-13.7804	-12.5757	1.2047	ExM
942	-35.152	-37.2326	-35.2854	1.9472	ExM
943	-6.0405	-6.2174	-7.8598	-1.6424	ExM
944	-123.929	-124.168	-125.476	-1.3077	ExM
945	-90.5519	-91.6714	-90.947	0.7244	ExM
946	-12.3926	-13.435	-12.8274	0.6076	ExM
947	-4.2624	-5.5336	-4.5915	0.9421	ExM
948	-26.8794	-28.476	-27.1057	1.3703	ExM
949	-5.2603	-6.0185	-5.8923	0.1262	ExM
950	-23.0908	-23.8258	-23.7438	0.082	ExM
951	-25.4164	-27.819	-25.5112	2.3078	ExM
952	-87.2536	-90.5763	-87.2903	3.286	ExM
953	-5.6796	-5.7367	-8.5719	-2.8352	ExM
954	-3.5022	-5.1347	-3.7197	1.415	ExM
955	-121.257	-122.191	-121.757	0.4344	ExM
956	-39.3719	-39.601	-40.9581	-1.3571	ExM
957	-162.388	-162.39	-168.459	-6.0696	ExM
958	-5.7404	-6.5057	-6.3662	0.1395	ExM
959	-12.344	-13.8957	-12.5822	1.3135	ExM
960	-5.2608	-6.019	-5.8929	0.1261	ExM
961	-202.142	-202.142	-238.426	-36.2842	ExM
962	-264.26	-264.26	-280.68	-16.4204	ExM
963	-5.7404	-6.5057	-6.3662	0.1395	ExM
964	-5.7404	-6.5057	-6.3662	0.1395	ExM
965	-98.6498	-99.5968	-99.1406	0.4562	ExM
966	-94.4213	-94.4559	-97.8017	-3.3458	ExM
967	-31.1951	-32.1036	-31.7112	0.3924	ExM
968	-5.6625	-6.6103	-6.1528	0.4575	ExM
969	-4.1933	-5.4276	-4.5372	0.8904	ExM
970	-4.1933	-5.4276	-4.5372	0.8904	ExM
971	-4.2624	-5.5336	-4.5915	0.9421	ExM
972	-12.887	-14.1785	-13.2084	0.9701	ExM
973	-184.302	-184.344	-187.501	-3.1574	ExM
974	-28.1962	-28.301	-30.5046	-2.2036	ExM
975	-145.847	-145.848	-152.791	-6.943	ExM
976	-3.0901	-4.1588	-3.5108	0.648	ExM
977	-2.4897	-3.77	-2.8154	0.9546	ExM
978	-219.111	-219.161	-222.135	-2.9742	ExM
979	-33.6657	-33.8056	-35.7017	-1.8961	ExM
980	-329.235	-329.235	-337.247	-8.0121	ExM
981	-337.153	-337.153	-349.084	-11.9311	ExM
982	-18.3133	-19.1059	-18.916	0.1899	ExM
983	-47.4961	-47.5007	-52.8812	-5.3805	ExM
984	-234.872	-234.872	-263.192	-28.3196	ExM
985	-25.768	-26.0171	-27.2799	-1.2628	ExM
986	-5.3165	-5.5676	-6.8212	-1.2536	ExM
987	-3.5022	-5.1347	-3.7197	1.415	ExM
988	-5.036	-6.1675	-5.4255	0.742	ExM
989	-4.6616	-5.3996	-5.3117	0.0879	ExM
990	-5.6625	-6.6103	-6.1528	0.4575	ExM
991	-5.1194	-5.5535	-6.163	-0.6095	ExM
992	-7.132	-8.5423	-7.4118	1.1305	ExM
993	-27.686	-28.8349	-28.0673	0.7676	ExM
994	-12.4475	-13.9991	-12.6856	1.3135	ExM
995	-6.0405	-6.2174	-7.8598	-1.6424	ExM
996	-4.6616	-5.3996	-5.3117	0.0879	ExM
997	-37.4893	-38.1366	-38.2306	-0.094	ExM
998	-17.0501	-17.0596	-21.7144	-4.6548	ExM
999	-39.282	-40.2618	-39.7527	0.5091	ExM
1000	-4.9671	-6.5613	-5.1941	1.3672	ExM
1001	-12.9294	-12.9511	-16.768	-3.8169	ExM
1002	-20.5917	-21.3479	-21.2255	0.1224	ExM
1003	-4.6616	-5.3996	-5.3117	0.0879	ExM
1004	-12.6178	-14.1694	-12.8559	1.3135	ExM
1005	-13.3287	-13.7646	-14.3693	-0.6047	ExM
1006	-59.4952	-62.3918	-59.5519	2.8399	ExM
1007	-5.6796	-5.7367	-8.5719	-2.8352	ExM
1008	-4.6612	-5.3992	-5.3114	0.0878	ExM
1009	-4.1931	-5.4273	-4.537	0.8903	ExM
1010	-12.0792	-13.3668	-12.4021	0.9647	ExM
1011	-382.009	-382.031	-385.826	-3.7949	ExM
1012	-14.6468	-14.7304	-17.1697	-2.4393	ExM
1013	-22.6834	-23.3236	-23.4325	-0.1089	ExM
1014	-230.614	-230.779	-232.492	-1.7128	ExM
1015	-307.843	-307.843	-323.167	-15.3241	ExM
1016	-5.1194	-5.5535	-6.163	-0.6095	ExM
1017	-4.1933	-5.4276	-4.5372	0.8904	ExM
1018	-523.899	-524.044	-525.898	-1.8541	ExM
1019	-5.5652	-5.9109	-6.7952	-0.8843	ExM
1020	-4.2612	-5.5324	-4.5904	0.942	ExM
1021	-20.7147	-22.8818	-20.8363	2.0455	ExM
1022	-3.5022	-5.1347	-3.7197	1.415	ExM
1023	-12.4914	-12.8046	-13.8047	-1.0001	ExM
1024	-4.1933	-5.4276	-4.5372	0.8904	ExM
1025	-4.9671	-6.5613	-5.1941	1.3672	ExM
1026	-5.1194	-5.5535	-6.163	-0.6095	ExM
1027	-5.7404	-6.5057	-6.3662	0.1395	ExM
1028	-5.6796	-5.7367	-8.5719	-2.8352	ExM
1029	-86.45	-87.6026	-86.8295	0.7731	ExM
1030	-15.8617	-16.0059	-17.8689	-1.863	ExM
1031	-25.2409	-26.3135	-25.6596	0.6539	ExM
1032	-121.175	-121.26	-123.688	-2.4284	ExM
1033	-220.883	-223.233	-220.984	2.2495	ExM
1034	-99.1153	-100.336	-99.465	0.8707	ExM
1035	-212.344	-212.346	-218.604	-6.2583	ExM
1036	-82.0809	-82.362	-83.4873	-1.1253	ExM
1037	-296.955	-296.961	-302.144	-5.184	ExM
1038	-325.647	-325.647	-348.073	-22.4253	ExM
1039	-171.72	-180.157	-171.72	8.4372	ExM
1040	-86.9275	-88.5066	-87.1583	1.3483	ExM
1041	-12.555	-14.1462	-12.7828	1.3634	ExM
1042	-15.3063	-16.7418	-15.5781	1.1637	ExM
1043	-13.7245	-15.0128	-14.047	0.9658	ExM
1044	-18.9796	-19.6448	-19.7015	-0.0567	ExM
1045	-82.6007	-82.6963	-84.9959	-2.2996	ExM
1046	-5.6796	-5.7367	-8.5719	-2.8352	ExM
1047	-11.6455	-12.2423	-12.4454	-0.2031	ExM
1048	-19.5562	-20.355	-20.1538	0.2012	ExM
1049	-12.9563	-14.2733	-13.2682	1.0051	ExM
1050	-26.3127	-27.0358	-26.9768	0.059	ExM
1051	-6.0405	-6.2174	-7.8598	-1.6424	ExM
1052	-75.4633	-77.2457	-75.6475	1.5982	ExM
1053	-3.5022	-5.1347	-3.7197	1.415	ExM
1054	-109.98	-110.366	-111.117	-0.7511	ExM
1055	-48.0109	-48.1116	-50.3567	-2.2451	ExM
1056	-60.8047	-64.7235	-60.8248	3.8987	ExM
1057	-36.7677	-37.2814	-37.6797	-0.3983	ExM
1058	-45.2875	-47.6151	-45.3901	2.225	ExM
1059	-3.5022	-5.1347	-3.7197	1.415	ExM
1060	-135.164	-135.164	-157.49	-22.3264	ExM
1061	-14.6082	-15.7398	-14.9975	0.7423	ExM
1062	-6.0021	-7.2654	-6.3344	0.931	ExM
1063	-3.5022	-5.1347	-3.7197	1.415	ExM
1064	-15.6962	-15.9611	-17.1544	-1.1933	ExM
1065	-82.4961	-84.1384	-82.7112	1.4272	ExM
1066	-186.561	-188.652	-186.693	1.9592	ExM
1067	-274.993	-291.264	-274.993	16.271	ExM
1068	-22.4383	-23.3592	-22.9461	0.4131	ExM
1069	-84.5276	-85.1384	-85.3105	-0.1721	ExM
1070	-301.264	-319.661	-301.264	18.397	ExM
1071	-111.306	-112.257	-111.794	0.4626	ExM
1072	-29.6695	-32.4694	-29.7323	2.7371	ExM
1073	-141.686	-144.755	-141.734	3.0207	ExM
1074	-4.6616	-5.3996	-5.3117	0.0879	ExM
1075	-243.643	-243.709	-246.383	-2.6735	ExM
1076	-286.689	-293.222	-286.691	6.5315	ExM
1077	-201.375	-215.508	-201.375	14.1336	ExM
1078	-72.439	-73.6093	-72.8105	0.7988	ExM
1079	-20.4468	-21.5809	-20.835	0.7459	ExM
1080	-87.5965	-87.7472	-89.5638	-1.8166	ExM
1081	-524.995	-524.995	-577.745	-52.75	ExM
1082	-43.4262	-43.736	-44.7491	-1.0131	ExM
1083	-328.334	-328.335	-335.489	-7.1542	ExM
1084	-93.4033	-98.5888	-93.4089	5.1799	ExM
1085	-20.3608	-21.533	-20.7314	0.8016	ExM
1086	-222.669	-225.245	-222.749	2.4967	ExM
1087	-61.1275	-61.5905	-62.12	-0.5295	ExM
1088	-254.006	-257.212	-254.047	3.1649	ExM
1089	-366.445	-374.97	-366.445	8.5244	ExM
1090	-39.9828	-40.4908	-40.9032	-0.4124	ExM
1091	-363.565	-363.565	-384.611	-21.0457	ExM
1092	-152.402	-152.403	-159.804	-7.4016	ExM
1093	-151.815	-151.815	-161.589	-9.7741	ExM
1094	-381.68	-381.68	-402.598	-20.9178	ExM
1095	-53.691	-55.1556	-53.954	1.2016	ExM
1096	-182.452	-187.076	-182.462	4.614	ExM
1097	-188.9	-200.594	-188.9	11.6939	ExM
1098	-219.446	-219.48	-222.838	-3.3583	ExM
1099	-47.3813	-47.5174	-49.443	-1.9256	ExM
1100	-5.5652	-5.9109	-6.7952	-0.8843	ExM
1101	-135.974	-136.049	-138.597	-2.5471	ExM
1102	-5.7404	-6.5057	-6.3662	0.1395	ExM
1103	-64.2918	-67.651	-64.3272	3.3238	ExM
1104	-107.393	-108.82	-107.667	1.1522	ExM
1105	-229.64	-233.764	-229.656	4.108	ExM
1106	-12.7027	-13.0082	-14.0377	-1.0295	ExM
1107	-16.5865	-17.3776	-17.1904	0.1872	ExM
1108	-606.675	-606.675	-684.158	-77.4831	ExM
1109	-513.85	-513.85	-533.478	-19.6273	ExM
1110	-16.3382	-16.691	-17.5513	-0.8603	ExM
1111	-21.5448	-21.7151	-23.3993	-1.6842	ExM
1112	-75.4813	-75.4813	-91.4206	-15.9393	ExM
1113	-379.667	-379.679	-384.043	-4.3639	ExM
1114	-12.1882	-13.7398	-12.4263	1.3135	ExM
1115	-143.863	-149.227	-143.867	5.3602	ExM
1116	-408.773	-421.454	-408.773	12.6809	ExM
1117	-150.703	-152.998	-150.809	2.1882	ExM
1118	-181.767	-188.898	-181.768	7.1298	ExM
1119	-159.723	-170.233	-159.723	10.5099	ExM
1120	-13.0336	-14.5853	-13.2718	1.3135	ExM
1121	-14.0711	-14.6414	-14.9044	-0.263	ExM
1122	-20.0738	-21.108	-20.513	0.595	ExM
1123	-5.2608	-6.019	-5.8929	0.1261	ExM
1124	-3.5022	-5.1347	-3.7197	1.415	ExM
1125	-50.843	-53.4967	-50.916	2.5807	ExM
1126	-4.6616	-5.3996	-5.3117	0.0879	ExM
1127	-5.2608	-6.019	-5.8929	0.1261	ExM
1128	-22.9475	-24.0571	-23.3475	0.7096	ExM
1129	-97.551	-98.7776	-97.8981	0.8795	ExM
1130	-25.468	-27.9526	-25.555	2.3976	ExM
1131	-17.7254	-19.1549	-17.9991	1.1558	ExM
1132	-5.2608	-6.019	-5.8929	0.1261	ExM
1133	-5.6796	-5.7367	-8.5719	-2.8352	ExM
1134	-4.1933	-5.4276	-4.5372	0.8904	ExM
1135	-4.2624	-5.5336	-4.5915	0.9421	ExM
1136	-196.93	-204.834	-196.931	7.9035	ExM
1137	-5.5652	-5.9109	-6.7952	-0.8843	ExM
1138	-25.4125	-26.3149	-25.9326	0.3823	ExM
1139	-12.184	-12.4924	-13.5105	-1.0181	ExM
1140	-5.6796	-5.7367	-8.5719	-2.8352	ExM
1141	-10.6709	-12.2593	-10.8994	1.3599	ExM
1142	-141.926	-145.205	-141.965	3.2406	ExM
1143	-4.9671	-6.5613	-5.1941	1.3672	ExM
1144	-4.2624	-5.5336	-4.5915	0.9421	ExM
1145	-139.382	-139.432	-142.395	-2.9632	ExM
1146	-239.382	-239.386	-244.828	-5.4422	ExM
1147	-107.843	-107.844	-114.562	-6.7178	ExM
1148	-326.046	-338.925	-326.046	12.8787	ExM
1149	-4.2624	-5.5336	-4.5915	0.9421	ExM
1150	-61.5987	-61.6401	-64.8041	-3.164	ExM
1151	-30.8818	-31.8411	-31.3649	0.4762	ExM
1152	-178.528	-178.58	-181.52	-2.9397	ExM
1153	-137.436	-143.404	-137.438	5.9657	ExM
1154	-212.043	-212.043	-222.775	-10.7323	ExM
1155	-239.851	-239.955	-242.167	-2.212	ExM
1156	-103.892	-107.458	-103.921	3.5371	ExM
1157	-196.304	-196.304	-209.193	-12.8887	ExM
1158	-38.2111	-39.0398	-38.7848	0.255	ExM
1159	-372.091	-372.091	-384.237	-12.1458	ExM
1160	-217.734	-217.734	-234.254	-16.5202	ExM
1161	-29.4981	-29.7594	-30.9677	-1.2083	ExM
1162	-42.089	-42.0918	-47.9781	-5.8863	ExM
1163	-22.005	-22.1629	-23.9288	-1.7659	ExM
1164	-41.8947	-41.8971	-47.9483	-6.0512	ExM
1165	-43.5599	-43.5626	-49.5047	-5.9421	ExM
1166	-478.722	-478.722	-516.132	-37.4107	ExM
1167	-430.23	-430.23	-478.745	-48.5153	ExM
1168	-434.836	-434.836	-490.274	-55.4377	ExM
1169	-9.9636	-10.4957	-10.8488	-0.3531	ExM
1170	-18.5532	-18.6533	-20.9041	-2.2508	ExM
1171	-195.72	-195.72	-218.898	-23.1773	ExM
1172	-24.0496	-25.0858	-24.4878	0.598	ExM
1173	-256.403	-256.403	-269.069	-12.6659	ExM
1174	-512.235	-512.235	-550.671	-38.4362	ExM
1175	-297.087	-298.497	-297.367	1.1296	ExM
1176	-303.772	-316.756	-303.772	12.9839	ExM
1177	-253.738	-276.943	-253.738	23.2048	ExM
1178	-319.719	-319.865	-321.709	-1.8441	ExM
1179	-5.3165	-5.5676	-6.8212	-1.2536	ExM
1180	-4.9671	-6.5613	-5.1941	1.3672	ExM
1181	-15.0736	-15.2178	-17.0811	-1.8633	ExM
1182	-6.6388	-7.741	-7.0426	0.6984	ExM
1183	-5.1194	-5.5535	-6.163	-0.6095	ExM
1184	-4.9665	-6.5605	-5.1935	1.367	ExM
1185	-5.6796	-5.7367	-8.5719	-2.8352	ExM
1186	-372.507	-379.415	-372.508	6.9072	ExM
1187	-19.4645	-19.905	-20.4964	-0.5914	ExM
1188	-287.726	-294.871	-287.727	7.1441	ExM
1189	-76.0954	-81.1053	-76.1021	5.0032	ExM
1190	-282.794	-282.794	-293.96	-11.1665	ExM
1191	-438.77	-438.77	-497.499	-58.7286	ExM
1192	-120.179	-120.269	-122.631	-2.3619	ExM
1193	-400.111	-400.111	-428.449	-28.3381	ExM
1194	-377.708	-377.708	-407.506	-29.7978	ExM
1195	-27.0254	-27.7374	-27.7001	0.0373	ExM
1196	-13.7658	-14.3718	-14.5546	-0.1828	ExM
1197	-36.2793	-38.6975	-36.3726	2.3249	ExM
1198	-5.6796	-5.7367	-8.5719	-2.8352	ExM
1199	-5.5652	-5.9109	-6.7952	-0.8843	ExM
1200	-138.466	-138.469	-144.301	-5.8323	ExM
1201	-6.0405	-6.2174	-7.8598	-1.6424	ExM
1202	-3.5022	-5.1347	-3.7197	1.415	ExM
1203	-5.3165	-5.5676	-6.8212	-1.2536	ExM
1204	-62.3316	-68.2173	-62.3344	5.8829	ExM
1205	-160.242	-160.242	-170.921	-10.6787	ExM
1206	-4.1933	-5.4276	-4.5372	0.8904	ExM
1207	-90.6117	-98.1517	-90.6122	7.5395	ExM
1208	-4.9671	-6.5613	-5.1941	1.3672	ExM
1209	-5.5955	-5.8916	-6.957	-1.0654	ExM
1210	-19.8486	-20.3113	-20.8417	-0.5304	ExM
1211	-47.9795	-48.0203	-51.1999	-3.1796	ExM
1212	-5.662	-6.6097	-6.1524	0.4573	ExM
1213	-5.1191	-5.5532	-6.1627	-0.6095	ExM
1214	-5.6793	-5.7363	-8.5714	-2.8351	ExM
1215	-51.1641	-51.6112	-52.1843	-0.5731	ExM
1216	-23.1333	-23.2838	-25.1014	-1.8176	ExM
1217	-46.2458	-47.831	-46.4751	1.3559	ExM
1218	-5.6793	-5.7363	-8.5714	-2.8351	ExM
1219	-20.6433	-22.4532	-20.822	1.6312	ExM
1220	-42.4657	-44.5642	-42.5965	1.9677	ExM
1221	-23.7132	-26.2001	-23.8	2.4001	ExM
1222	-98.2028	-99.6785	-98.4624	1.2161	ExM
1223	-5.5955	-5.8916	-6.957	-1.0654	ExM
1224	-21.0059	-21.8373	-21.5776	0.2597	ExM
1225	-13.4793	-14.7674	-13.802	0.9654	ExM
1226	-34.3971	-37.1195	-34.4651	2.6544	ExM
1227	-4.6612	-5.3992	-5.3114	0.0878	ExM
1228	-4.6612	-5.3992	-5.3114	0.0878	ExM
1229	-37.8658	-38.1505	-39.2611	-1.1106	ExM
1230	-94.971	-95.0678	-97.3543	-2.2865	ExM
1231	-13.0827	-13.5175	-14.125	-0.6075	ExM
1232	-45.469	-45.6674	-47.1842	-1.5168	ExM
1233	-25.8479	-27.1359	-26.1706	0.9653	ExM
1234	-4.9664	-6.5604	-5.1934	1.367	ExM
1235	-14.3411	-14.9114	-15.1745	-0.2631	ExM
1236	-29.3954	-29.7716	-30.5554	-0.7838	ExM
1237	-84.6173	-84.6474	-88.1358	-3.4884	ExM
1238	-5.0978	-6.7437	-5.312	1.4317	ExM
1239	-153.684	-154.528	-154.245	0.2824	ExM
1240	-299.291	-299.365	-301.937	-2.5721	ExM
1241	-5.2598	-6.018	-5.8918	0.1262	ExM
1242	-3.5018	-5.1342	-3.7193	1.4149	ExM
1243	-161.776	-161.776	-173.571	-11.7949	ExM
1244	-50.676	-52.2034	-50.9207	1.2827	ExM
1245	-50.2811	-53.2382	-50.3344	2.9038	ExM
1246	-189.121	-189.13	-193.817	-4.6876	ExM
1247	-349.316	-349.316	-358.909	-9.5933	ExM
1248	-13.6074	-14.2035	-14.4081	-0.2046	ExM
1249	-5.5648	-5.9105	-6.7948	-0.8843	ExM
1250	-5.6793	-5.7363	-8.5714	-2.8351	ExM
1251	-12.5767	-13.8935	-12.8887	1.0048	ExM
1252	-501.083	-501.083	-542.612	-41.5285	ExM
1253	-202.7	-202.706	-207.804	-5.0973	ExM
1254	-41.251	-41.8404	-42.06	-0.2196	ExM
1255	-245.745	-245.745	-269.811	-24.0657	ExM
1256	-112.731	-114.989	-112.841	2.1478	ExM
1257	-101.297	-102.16	-101.845	0.3152	ExM
1258	-172.304	-172.304	-183.476	-11.172	ExM
1259	-185.417	-188.909	-185.448	3.4607	ExM
1260	-285.555	-293.7	-285.556	8.1448	ExM
1261	-106.73	-106.73	-116.227	-9.4962	ExM
1262	-70.9624	-71.5198	-71.8125	-0.2927	ExM
1263	-44.8232	-46.3254	-45.075	1.2504	ExM
1264	-226.552	-227.673	-226.946	0.7265	ExM
1265	-13.59	-14.1864	-14.3904	-0.204	ExM
1266	-5.6793	-5.7363	-8.5714	-2.8351	ExM
1267	-5.1191	-5.5532	-6.1627	-0.6095	ExM
1268	-5.7398	-6.505	-6.3658	0.1392	ExM
1269	-38.7403	-40.8243	-38.8731	1.9512	ExM
1270	-12.8203	-14.4704	-13.0335	1.4369	ExM
1271	-6.0011	-7.2643	-6.3334	0.9309	ExM
1272	-360.721	-381.494	-360.721	20.7731	ExM
1273	-19.8947	-21.9203	-20.0362	1.8841	ExM
1274	-5.7398	-6.505	-6.3658	0.1392	ExM
1275	-158.705	-160.255	-158.944	1.3117	ExM
1276	-266.436	-275.245	-266.436	8.8089	ExM
1277	-15.5946	-15.9108	-16.9	-0.9892	ExM
1278	-155.08	-163.272	-155.08	8.1918	ExM
1279	-211.826	-226.886	-211.826	15.0597	ExM
1280	-80.8431	-83.1504	-80.9479	2.2025	ExM
1281	-11.1339	-12.7372	-11.3586	1.3786	ExM
1282	-54.808	-55.9279	-55.2031	0.7248	ExM
1283	-182.895	-195.491	-182.895	12.5957	ExM
1284	-49.9784	-50.0151	-53.3022	-3.2871	ExM
1285	-4.6612	-5.3992	-5.3114	0.0878	ExM
1286	-184.209	-184.209	-193.899	-9.69	ExM
1287	-47.5875	-49.453	-47.7557	1.6973	ExM
1288	-26.5526	-27.3177	-27.1787	0.139	ExM
1289	-51.3445	-53.4819	-51.47	2.0119	ExM
1290	-81.7577	-87.5534	-81.7607	5.7927	ExM
1291	-418.157	-418.157	-425.646	-7.4889	ExM
1292	-110.19	-110.677	-111.144	-0.4668	ExM
1293	-275.511	-280.009	-275.523	4.4867	ExM
1294	-4.8912	-6.1609	-5.2209	0.94	ExM
1295	-188.766	-189.003	-190.323	-1.32	ExM
1296	-215.904	-215.904	-232.371	-16.4674	ExM
1297	-386.171	-386.171	-403.869	-17.6977	ExM
1298	-399.446	-399.446	-421.276	-21.8301	ExM
1299	-125.391	-125.44	-128.428	-2.9876	ExM
1300	-153.909	-154.496	-154.721	-0.2252	ExM
1301	-1.7317	-3.1345	-2.014	1.1205	ExM
1302	-71.5418	-71.8603	-72.841	-0.9807	ExM
1303	-162.406	-162.427	-166.283	-3.8562	ExM
1304	-144.038	-144.055	-148.095	-4.0396	ExM
1305	-248.082	-248.082	-269.423	-21.3417	ExM
1306	-170.622	-170.623	-178.444	-7.8212	ExM
1307	-240.876	-240.876	-257.294	-16.4181	ExM
1308	-62.2942	-62.4409	-64.2864	-1.8455	ExM
1309	-487.964	-487.964	-515.143	-27.1791	ExM
1310	-399.363	-399.364	-407.662	-8.298	ExM
1311	-112.665	-112.971	-113.998	-1.0271	ExM
1312	-132.701	-132.804	-135.029	-2.225	ExM
1313	-404.998	-405	-411.141	-6.1409	ExM
1314	-190.845	-192.294	-191.112	1.1824	ExM
1315	-178	-178.399	-179.113	-0.7141	ExM
1316	-14.5231	-14.6831	-16.4346	-1.7515	ExM
1317	-352.581	-358.089	-352.585	5.5035	ExM
1318	-223.938	-224.187	-225.452	-1.2654	ExM
1319	-378.729	-380.245	-378.977	1.2685	ExM
1320	-40.2686	-41.0712	-40.8632	0.208	ExM
1321	-77.3618	-77.525	-79.2551	-1.7301	ExM
1322	-20.6026	-22.5193	-20.7617	1.7576	ExM
1323	-93.4685	-93.5633	-95.872	-2.3087	ExM
1324	-195.348	-196.037	-196.045	-0.0082	ExM
1325	-218.402	-218.402	-226.858	-8.4567	ExM
1326	-359.232	-359.232	-375.145	-15.9127	ExM
1327	-129.809	-129.819	-134.389	-4.5697	ExM
1328	-58.5174	-59.2508	-59.1719	0.0789	ExM
1329	-19.1314	-19.4429	-20.4493	-1.0064	ExM
1330	-73.3169	-75.0862	-73.5038	1.5824	ExM
1331	-15.1455	-15.6394	-16.0877	-0.4483	ExM
1332	-230.685	-241.147	-230.685	10.4626	ExM
1333	-79.5933	-79.7083	-81.813	-2.1047	ExM
1334	-175.14	-190.186	-175.14	15.0456	ExM
1335	-24.8774	-25.1546	-26.2958	-1.1412	ExM
1336	-157.881	-161.869	-157.899	3.9693	ExM
1337	-6.0405	-6.2174	-7.8598	-1.6424	ExM
1338	-121.075	-122.148	-121.493	0.6551	ExM
1339	-5.6625	-6.6103	-6.1528	0.4575	ExM
1340	-13.8985	-14.7603	-14.4474	0.3129	ExM
1341	-6.0021	-7.2654	-6.3344	0.931	ExM
1342	-253.147	-253.147	-265.916	-12.7697	ExM
1343	-160.401	-160.734	-161.665	-0.9316	ExM
1344	-104.249	-104.249	-115.938	-11.6894	ExM
1345	-11.4181	-12.0898	-12.1332	-0.0434	ExM
1346	-59.0573	-60.1952	-59.4437	0.7515	ExM
1347	-5.596	-5.8921	-6.9575	-1.0654	ExM
1348	-35.3082	-35.3104	-41.4133	-6.1029	ExM
1349	-144.938	-150.978	-144.94	6.0377	ExM
1350	-160.087	-171.087	-160.087	10.9997	ExM
1351	-40.2943	-42.1362	-40.4669	1.6693	ExM
1352	-15.1643	-15.2681	-17.4811	-2.213	ExM
1353	-111.299	-115.512	-111.314	4.1983	ExM
1354	-60.7535	-60.759	-65.9455	-5.1865	ExM
1355	-4.9671	-6.5613	-5.1941	1.3672	ExM
1356	-18.4259	-19.0271	-19.2203	-0.1932	ExM
1357	-27.533	-28.7552	-27.882	0.8732	ExM
1358	-25.9162	-27.2732	-26.2139	1.0593	ExM
1359	-16.0567	-16.7407	-16.7591	-0.0184	ExM
1360	-11.7372	-13.3291	-11.9647	1.3644	ExM
1361	-24.3775	-24.4611	-26.9018	-2.4407	ExM
1362	-4.9671	-6.5613	-5.1941	1.3672	ExM
1363	-102.855	-103.463	-103.641	-0.1785	ExM
1364	-45.3387	-47.8597	-45.4225	2.4372	ExM
1365	-5.6625	-6.6103	-6.1528	0.4575	ExM
1366	-5.5939	-5.89	-6.9553	-1.0653	ExM
1367	-5.6782	-5.7353	-8.57	-2.8347	ExM
1368	-238.762	-239.529	-239.387	0.1418	ExM
1369	-99.1623	-100.758	-99.3889	1.3689	ExM
1370	-67.3317	-70.0601	-67.3992	2.6609	ExM
1371	-363.976	-363.977	-371.043	-7.066	ExM
1372	-462.353	-462.353	-495.135	-32.7822	ExM
1373	-381.298	-381.298	-397.346	-16.0474	ExM
1374	-405.258	-405.258	-451.573	-46.3156	ExM
1375	-425.957	-425.957	-470.212	-44.2554	ExM
1376	-178.533	-180.458	-178.69	1.768	ExM
1377	-11.4654	-11.7216	-12.9526	-1.231	ExM
1378	-2.795	-3.575	-3.4081	0.1669	ExM
1379	-88.8386	-88.8415	-94.6788	-5.8373	ExM
1380	-221.478	-221.679	-223.178	-1.4989	ExM
1381	-67.9872	-69.471	-68.2444	1.2266	ExM
1382	-26.4205	-27.5884	-26.7931	0.7953	ExM
1383	-4.6616	-5.3996	-5.3117	0.0879	ExM
1384	-17.27	-18.3034	-17.7097	0.5937	ExM
1385	-4.9671	-6.5613	-5.1941	1.3672	ExM
1386	-12.6326	-13.7184	-13.0445	0.6739	ExM
1387	-5.1194	-5.5535	-6.163	-0.6095	ExM
1388	-4.2624	-5.5336	-4.5915	0.9421	ExM
1389	-4.6616	-5.3996	-5.3117	0.0879	ExM
1390	-5.6796	-5.7367	-8.5719	-2.8352	ExM
1391	-114.593	-115.347	-115.23	0.1165	ExM
1392	-83.8155	-84.1069	-85.1907	-1.0838	ExM
1393	-48.6757	-48.7208	-51.7966	-3.0758	ExM
1394	-229.974	-242.339	-229.974	12.3645	ExM
1395	-143.682	-149.78	-143.684	6.0964	ExM
1396	-436.172	-436.246	-438.811	-2.565	ExM
1397	-279.303	-279.323	-283.224	-3.9005	ExM
1398	-21.2173	-21.6404	-22.2814	-0.641	ExM
1399	-163.828	-163.86	-167.266	-3.4054	ExM
1400	-222.12	-222.12	-230.471	-8.3514	ExM
1401	-21.6747	-21.9277	-23.1732	-1.2455	ExM
1402	-5.5652	-5.9109	-6.7952	-0.8843	ExM
1403	-5.596	-5.8921	-6.9575	-1.0654	ExM
1404	-6.0405	-6.2174	-7.8598	-1.6424	ExM
1405	-12.4907	-13.6873	-12.8505	0.8368	ExM
1406	-12.2928	-12.5939	-13.6401	-1.0462	ExM
1407	-5.3165	-5.5676	-6.8212	-1.2536	ExM
1408	-118.4	-118.4	-137.594	-19.1938	ExM
1409	-84.2248	-84.2293	-89.6307	-5.4014	ExM
1410	-4.6616	-5.3996	-5.3117	0.0879	ExM
1411	-56.5854	-57.0768	-57.5314	-0.4546	ExM
1412	-13.1693	-14.7596	-13.3973	1.3623	ExM
1413	-21.6703	-22.6358	-22.1497	0.4861	ExM
1414	-4.7908	-6.5366	-4.9826	1.554	ExM
1415	-146.238	-154.402	-146.238	8.1639	ExM
1416	-5.7404	-6.5057	-6.3662	0.1395	ExM
1417	-5.0986	-6.7448	-5.3128	1.432	ExM
1418	-20.4263	-21.6421	-20.7779	0.8642	ExM
1419	-21.2831	-21.4871	-22.9733	-1.4862	ExM
1420	-15.3072	-15.8774	-16.1406	-0.2632	ExM
1421	-16.0645	-16.5717	-16.9864	-0.4147	ExM
1422	-30.1247	-30.2806	-32.0604	-1.7798	ExM
1423	-31.359	-31.9537	-32.1614	-0.2077	ExM
1424	-15.9061	-16.2665	-17.1014	-0.8349	ExM
1425	-5.3162	-5.5673	-6.8209	-1.2536	ExM
1426	-19.5433	-19.5602	-23.6311	-4.0709	ExM
1427	-19.6075	-21.0229	-19.8857	1.1372	ExM
1428	-229.993	-229.993	-237.916	-7.9228	ExM
1429	-46.078	-48.6817	-46.1548	2.5269	ExM
1430	-23.3288	-23.8166	-24.2806	-0.464	ExM
1431	-50.1339	-50.8315	-50.8226	0.0089	ExM
1432	-322.75	-322.752	-328.623	-5.8702	ExM
1433	-53.3584	-54.8	-53.6283	1.1717	ExM
1434	-26.1655	-26.1727	-31.1	-4.9273	ExM
1435	-148.737	-148.796	-151.612	-2.8163	ExM
1436	-5.2577	-6.016	-5.8897	0.1263	ExM
1437	-5.0339	-6.1648	-5.4236	0.7412	ExM
1438	-21.3664	-21.4697	-23.688	-2.2183	ExM
1439	-34.9094	-34.91	-42.2441	-7.3341	ExM
1440	-128.635	-128.635	-145.357	-16.7225	ExM
1441	-24.437	-25.1274	-25.1329	-0.0055	ExM
1442	-11.5308	-13.1014	-11.7639	1.3375	ExM
1443	-21.5272	-21.8656	-22.7752	-0.9096	ExM
1444	-279.953	-298.998	-279.953	19.045	ExM
1445	-44.6908	-46.5402	-44.862	1.6782	ExM
1446	-127.416	-130.624	-127.457	3.1667	ExM
1447	-49.9796	-49.9862	-55.003	-5.0168	ExM
1448	-35.4253	-36.0089	-36.2414	-0.2325	ExM
1449	-96.4509	-96.4523	-103.076	-6.6236	ExM
1450	-65.3903	-65.5469	-67.3215	-1.7746	ExM
1451	-26.6796	-27.9451	-27.011	0.9341	ExM
1452	-185.419	-188.77	-185.454	3.3156	ExM
1453	-275.629	-285.356	-275.629	9.7275	ExM
1454	-101.848	-105.627	-101.871	3.7555	ExM
1455	-50.4885	-51.5575	-50.9091	0.6484	ExM
1456	-14.2108	-14.4967	-15.6025	-1.1058	ExM
1457	-195.709	-198.919	-195.75	3.1688	ExM
1458	-97.9929	-98.002	-102.692	-4.6895	ExM
1459	-384.327	-384.327	-420.919	-36.5916	ExM
1460	-288.617	-288.617	-309.691	-21.0733	ExM
1461	-23.4993	-23.6068	-25.7825	-2.1757	ExM
1462	-330.871	-334.274	-330.905	3.3692	ExM
1463	-367.204	-367.204	-392.047	-24.8434	ExM
1464	-343.736	-343.736	-374.591	-30.8551	ExM
1465	-324.095	-324.329	-325.662	-1.333	ExM
1466	-385.498	-385.498	-393.965	-8.4671	ExM
1467	-133.75	-133.903	-135.701	-1.7984	ExM
1468	-357.541	-357.55	-362.329	-4.7791	ExM
1469	-87.171	-87.171	-101.13	-13.9589	ExM
1470	-22.0815	-22.5281	-23.1026	-0.5745	ExM
1471	-38.5485	-38.5925	-41.6954	-3.1029	ExM
1472	-244.844	-244.844	-277.026	-32.1819	ExM
1473	-72.5289	-72.5868	-75.408	-2.8212	ExM
1474	-84.1389	-84.4633	-85.4225	-0.9592	ExM
1475	-191.464	-205.76	-191.464	14.2968	ExM
1476	-241.042	-241.042	-250.252	-9.2097	ExM
1477	-440.009	-440.009	-482.35	-42.3408	ExM
1478	-24.0625	-24.7914	-24.7212	0.0702	ExM
1479	-2.495	-3.7511	-2.8301	0.921	ExM
1480	-2.3806	-3.1753	-2.9816	0.1937	ExM
1481	-84.9905	-85.9095	-85.4995	0.41	ExM
1482	-83.5354	-83.5358	-91.3566	-7.8208	ExM
1483	-114.129	-114.162	-117.542	-3.3799	ExM
1484	-56.3492	-56.5508	-58.0496	-1.4988	ExM
1485	-102.311	-102.507	-104.035	-1.5275	ExM
1486	-19.0709	-20.1994	-19.4617	0.7377	ExM
1487	-12.8096	-14.1733	-13.105	1.0683	ExM
1488	-25.6315	-26.0445	-26.7151	-0.6706	ExM
1489	-412.581	-412.581	-432.853	-20.2722	ExM
1490	-457.106	-457.106	-481.604	-24.4977	ExM
1491	-74.1653	-75.9707	-74.3449	1.6258	ExM
1492	-5.3165	-5.5676	-6.8212	-1.2536	ExM
1493	-267.032	-267.052	-270.935	-3.8823	ExM
1494	-335.971	-335.971	-345.036	-9.0651	ExM
1495	-251.715	-251.721	-256.938	-5.2173	ExM
1496	-255.272	-256.178	-255.79	0.3875	ExM
1497	-471.741	-471.741	-510.973	-39.2312	ExM
1498	-80.2584	-80.2874	-83.8116	-3.5242	ExM
1499	-47.2717	-47.2818	-51.8658	-4.584	ExM
1500	-103.959	-103.959	-116.268	-12.3087	ExM
1501	-319.874	-319.874	-336.171	-16.2972	ExM
1502	-577.849	-577.849	-662.192	-84.3431	ExM
1503	-387.635	-387.635	-404.586	-16.9515	ExM
1504	-366.265	-366.265	-377.44	-11.1747	ExM
1505	-48.9109	-48.9154	-54.3123	-5.3969	ExM
1506	-13.67	-15.0886	-13.9472	1.1414	ExM
1507	-18.5637	-19.2454	-19.2683	-0.0229	ExM
1508	-293.25	-303.893	-293.25	10.6431	ExM
1509	-268.819	-268.825	-273.928	-5.1029	ExM
1510	-13.8188	-15.7364	-13.9778	1.7586	ExM
1511	-27.2303	-28.3857	-27.6086	0.7771	ExM
1512	-61.0895	-64.5807	-61.1205	3.4602	ExM
1513	-69.8101	-69.9488	-71.8544	-1.9056	ExM
1514	-14.2238	-14.6586	-15.2662	-0.6076	ExM
1515	-207.198	-209.663	-207.287	2.3759	ExM
1516	-21.1187	-22.987	-21.2864	1.7006	ExM
1517	-469.139	-470.012	-469.679	0.3329	ExM
1518	-5.7399	-6.5051	-6.3658	0.1393	ExM
1519	-5.6793	-5.7364	-8.5715	-2.8351	ExM
1520	-392.573	-392.573	-433.879	-41.306	ExM
1521	-424.762	-424.927	-426.642	-1.7155	ExM
1522	-312.952	-312.956	-318.461	-5.5053	ExM
1523	-394.305	-394.305	-404.057	-9.7515	ExM
1524	-541.222	-541.222	-549.445	-8.2226	ExM
1525	-216.08	-226.39	-216.08	10.3094	ExM
1526	-39.1564	-41.5874	-39.2485	2.3389	ExM
1527	-432.608	-432.608	-447.409	-14.8007	ExM
1528	-409.21	-409.234	-412.917	-3.6828	ExM
1529	-40.1937	-41.9218	-40.3892	1.5326	ExM
1530	-23.6808	-26.1373	-23.7704	2.3669	ExM
1531	-144.452	-144.457	-149.719	-5.2618	ExM
1532	-143.736	-151.819	-143.736	8.0833	ExM
1533	-41.9988	-44.122	-42.1263	1.9957	ExM
1534	-146.626	-150.639	-146.644	3.9951	ExM
1535	-152.793	-152.801	-157.641	-4.8397	ExM
1536	-11.1046	-12.6935	-11.3329	1.3606	ExM
1537	-154.558	-155.505	-155.048	0.4572	ExM
1538	-30.4297	-31.1749	-31.0733	0.1016	ExM
1539	-92.2866	-92.3578	-94.9636	-2.6058	ExM
1540	-168.878	-179.428	-168.878	10.5495	ExM
1541	-20.2679	-21.0664	-20.8658	0.2006	ExM
1542	-98.8986	-104.876	-98.9011	5.9754	ExM
1543	-5.3162	-5.5673	-6.8209	-1.2536	ExM
1544	-131.537	-131.537	-141.358	-9.8208	ExM
1545	-279.288	-280.078	-279.894	0.184	ExM
1546	-27.1759	-28.1459	-27.6525	0.4934	ExM
1547	-12.4888	-13.1603	-13.204	-0.0437	ExM
1548	-27.6689	-27.8531	-29.4514	-1.5983	ExM
1549	-13.1838	-13.9041	-13.8504	0.0537	ExM
1550	-83.7403	-89.9353	-83.7424	6.1929	ExM
1551	-18.3193	-19.3444	-18.7636	0.5808	ExM
1552	-389.704	-389.704	-406.948	-17.2437	ExM
1553	-100.458	-102.454	-100.604	1.8499	ExM
1554	-74.3767	-74.4379	-77.2007	-2.7628	ExM
1555	-309.901	-309.901	-330.251	-20.3507	ExM
1556	-363.278	-363.279	-369.885	-6.6059	ExM
1557	-245.037	-245.269	-246.613	-1.3443	ExM
1558	-350.263	-355.288	-350.269	5.019	ExM
1559	-41.6747	-41.7834	-43.9484	-2.165	ExM
1560	-293.674	-298.609	-293.681	4.9284	ExM
1561	-278.471	-285.597	-278.471	7.1256	ExM
1562	-54.4164	-54.9631	-55.2813	-0.3182	ExM
1563	-405.468	-405.468	-454.334	-48.8655	ExM
1564	-286.171	-295.382	-286.171	9.2113	ExM
1565	-5.7404	-6.5057	-6.3662	0.1395	ExM
1566	-172.874	-172.874	-194.327	-21.4535	ExM
1567	-280.723	-280.723	-296.984	-16.2611	ExM
1568	-85.2306	-85.2308	-93.871	-8.6402	ExM
1569	-43.0459	-43.075	-46.6004	-3.5254	ExM
1570	-13.3717	-13.573	-15.0736	-1.5006	ExM
1571	-3.5729	-4.1059	-4.4568	-0.3509	ExM
1572	-6.0021	-7.2654	-6.3344	0.931	ExM
1573	-28.7194	-29.6501	-29.2207	0.4294	ExM
1574	-151.621	-151.621	-166.407	-14.7859	ExM
1575	-35.6882	-35.7185	-39.198	-3.4795	ExM
1576	-206.112	-206.113	-212.781	-6.6678	ExM
1577	-23.5148	-23.5194	-28.9095	-5.3901	ExM
1578	-5.3165	-5.5676	-6.8212	-1.2536	ExM
1579	-171.893	-171.893	-188.559	-16.6663	ExM
1580	-15.7558	-15.9001	-17.7631	-1.863	ExM
1581	-49.2257	-49.4987	-50.6577	-1.159	ExM
1582	-72.6119	-75.8869	-72.6504	3.2365	ExM
1583	-64.7315	-68.8035	-64.7487	4.0548	ExM
1584	-25.745	-25.9688	-27.352	-1.3832	ExM
1585	-228.928	-228.932	-234.414	-5.4818	ExM
1586	-280.201	-289.694	-280.201	9.4932	ExM
1587	-5.5944	-5.8905	-6.9559	-1.0654	ExM
1588	-244.981	-244.981	-262.203	-17.2221	ExM
1589	-100.726	-104.494	-100.749	3.7452	ExM
1590	-33.5	-35.8137	-33.6041	2.2096	ExM
1591	-62.6066	-65.3651	-62.6721	2.693	ExM
1592	-6.039	-6.2159	-7.8583	-1.6424	ExM
1593	-3.5007	-5.1328	-3.7182	1.4146	ExM
1594	-4.6604	-5.3982	-5.3107	0.0875	ExM
1595	-104.105	-104.55	-105.129	-0.5791	ExM
1596	-4.6604	-5.3982	-5.3107	0.0875	ExM
1597	-241.341	-241.341	-276.056	-34.7144	ExM
1598	-13.2109	-13.4062	-14.9405	-1.5343	ExM
1599	-25.3039	-27.3432	-25.4433	1.8999	ExM
1600	-14.858	-15.0363	-16.6699	-1.6336	ExM
1601	-286.627	-297.735	-286.627	11.1077	ExM
1602	-12.9764	-13.9232	-13.4674	0.4558	ExM
1603	-4.1926	-5.4268	-4.5366	0.8902	ExM
1604	-5.5944	-5.8905	-6.9559	-1.0654	ExM
1605	-5.7387	-6.5036	-6.3649	0.1387	ExM
1606	-5.661	-6.6085	-6.1515	0.457	ExM
1607	-5.2578	-6.016	-5.8898	0.1262	ExM
1608	-13.0639	-14.3417	-13.3905	0.9512	ExM
1609	-6.0382	-6.2151	-7.8575	-1.6424	ExM
1610	-40.6844	-41.5494	-41.2309	0.3185	ExM
1611	-204.325	-204.325	-211.749	-7.4241	ExM
1612	-33.5412	-36.3553	-33.603	2.7523	ExM
1613	-4.9649	-6.5585	-5.1921	1.3664	ExM
1614	-26.046	-28.1706	-26.1732	1.9974	ExM
1615	-228.363	-228.41	-231.461	-3.0514	ExM
1616	-2.5885	-3.4389	-3.1458	0.2931	ExM
1617	-11.466	-12.7586	-11.787	0.9716	ExM
1618	-56.8946	-58.0052	-57.2941	0.7111	ExM
1619	-80.1447	-80.6724	-81.0362	-0.3638	ExM
1620	-40.8003	-41.6661	-41.3463	0.3198	ExM
1621	-209.63	-209.636	-214.695	-5.0587	ExM
1622	-18.8535	-18.9065	-21.8192	-2.9127	ExM
1623	-23.1205	-23.2048	-25.6363	-2.4315	ExM
1624	-141.226	-141.226	-172.928	-31.7029	ExM
1625	-18.9224	-19.8277	-19.4406	0.3871	ExM
1626	-5.564	-5.9097	-6.7941	-0.8844	ExM
1627	-68.376	-68.4101	-71.7694	-3.3593	ExM
1628	-4.2614	-5.5326	-4.5906	0.942	ExM
1629	-20.2241	-22.2534	-20.365	1.8884	ExM
1630	-15.2702	-15.6226	-16.4842	-0.8616	ExM
1631	-21.2899	-22.7076	-21.5674	1.1402	ExM
1632	-312.253	-313.737	-312.51	1.2262	ExM
1633	-5.661	-6.6085	-6.1515	0.457	ExM
1634	-14.3314	-15.3725	-14.7668	0.6057	ExM
1635	-11.5595	-12.8751	-11.8719	1.0032	ExM
1636	-5.0339	-6.1648	-5.4236	0.7412	ExM
1637	-25.4374	-26.2943	-25.9899	0.3044	ExM
1638	-10.7787	-12.3671	-11.0072	1.3599	ExM
1639	-148.667	-148.757	-151.119	-2.362	ExM
1640	-29.3792	-29.453	-32.0223	-2.5693	ExM
1641	-29.3593	-29.773	-30.4418	-0.6688	ExM
1642	-5.2578	-6.016	-5.8898	0.1262	ExM
1643	-4.6604	-5.3982	-5.3107	0.0875	ExM
1644	-4.1926	-5.4268	-4.5366	0.8902	ExM
1645	-4.2614	-5.5326	-4.5906	0.942	ExM
1646	-5.564	-5.9097	-6.7941	-0.8844	ExM
1647	-5.999	-7.262	-6.3315	0.9305	ExM
1648	-5.0339	-6.1648	-5.4236	0.7412	ExM
1649	-13.1614	-14.5799	-13.4385	1.1414	ExM
1650	-4.1926	-5.4268	-4.5366	0.8902	ExM
1651	-13.5956	-15.2706	-13.803	1.4676	ExM
1652	-4.9649	-6.5585	-5.1921	1.3664	ExM
1653	-5.2578	-6.016	-5.8898	0.1262	ExM
1654	-6.6347	-7.7369	-7.0384	0.6985	ExM
1655	-5.0962	-6.7416	-5.3105	1.4311	ExM
1656	-5.2578	-6.016	-5.8898	0.1262	ExM
1657	-5.5944	-5.8905	-6.9559	-1.0654	ExM
1658	-3.5	-5.132	-3.7176	1.4144	ExM
1659	-47.9154	-49.7169	-48.0957	1.6212	ExM
1660	-5.0339	-6.1648	-5.4236	0.7412	ExM
1661	-4.9649	-6.5585	-5.1921	1.3664	ExM
1662	-142.305	-147.924	-142.309	5.6156	ExM
1663	-4.6604	-5.3982	-5.3107	0.0875	ExM
1664	-5.661	-6.6085	-6.1515	0.457	ExM
1665	-49.2125	-52.0525	-49.2727	2.7798	ExM
1666	-4.2614	-5.5326	-4.5906	0.942	ExM
1667	-45.4609	-46.337	-45.9995	0.3375	ExM
1668	-65.4317	-65.9577	-66.3257	-0.368	ExM
1669	-115.604	-120.277	-115.613	4.6636	ExM
1670	-26.426	-28.2357	-26.6048	1.6309	ExM
1671	-17.1185	-17.4379	-18.4152	-0.9773	ExM
1672	-4.1926	-5.4268	-4.5366	0.8902	ExM
1673	-90.3359	-90.4704	-92.4089	-1.9385	ExM
1674	-4.1926	-5.4268	-4.5366	0.8902	ExM
1675	-14.6941	-15.356	-15.4195	-0.0635	ExM
1676	-4.2614	-5.5326	-4.5906	0.942	ExM
1677	-4.7895	-6.5348	-4.9813	1.5535	ExM
1678	-5.0339	-6.1648	-5.4236	0.7412	ExM
1679	-6.6347	-7.7369	-7.0384	0.6985	ExM
1680	-6.0393	-6.2162	-7.8586	-1.6424	ExM
1681	-5.5944	-5.8905	-6.9559	-1.0654	ExM
1682	-4.6604	-5.3982	-5.3107	0.0875	ExM
1683	-5.2578	-6.016	-5.8898	0.1262	ExM
1684	-3.501	-5.1332	-3.7185	1.4147	ExM
1685	-5.2578	-6.016	-5.8898	0.1262	ExM
1686	-5.6786	-5.7356	-8.5705	-2.8349	ExM
1687	-76.1606	-80.915	-76.1693	4.7457	ExM
1688	-3.499	-5.1307	-3.7166	1.4141	ExM
1689	-13.1255	-13.657	-14.0115	-0.3545	ExM
1690	-25.9045	-26.2422	-27.1539	-0.9117	ExM
1691	-105.257	-105.263	-110.363	-5.1002	ExM
1692	-15.6814	-16.4716	-16.286	0.1856	ExM
1693	-5.0304	-6.1603	-5.4206	0.7397	ExM
1694	-5.5918	-5.8879	-6.9531	-1.0652	ExM
1695	-5.5918	-5.8879	-6.9531	-1.0652	ExM
1696	-4.6583	-5.3959	-5.3089	0.087	ExM
1697	-33.0142	-35.0255	-33.1578	1.8677	ExM
1698	-4.2597	-5.5308	-4.589	0.9418	ExM
1699	-106.162	-110.385	-106.177	4.2088	ExM
1700	-336.164	-336.164	-357.57	-21.406	ExM
1701	-57.2735	-57.4976	-58.8789	-1.3813	ExM
1702	-130.272	-130.272	-151.563	-21.2914	ExM
1703	-101.489	-110.642	-101.489	9.1533	ExM
1704	-13.9275	-14.0832	-15.8645	-1.7813	ExM
1705	-5.3137	-5.5648	-6.8184	-1.2536	ExM
1706	-5.0921	-6.7362	-5.3067	1.4295	ExM
1707	-4.6583	-5.3959	-5.3089	0.087	ExM
1708	-11.8718	-13.4239	-12.1098	1.3141	ExM
1709	-12.4467	-13.0921	-13.19	-0.0979	ExM
1710	-4.6583	-5.3959	-5.3089	0.087	ExM
1711	-5.6585	-6.6054	-6.1494	0.456	ExM
1712	-76.5585	-76.6384	-79.1248	-2.4864	ExM
1713	-107.33	-107.903	-108.159	-0.2558	ExM
1714	-13.7072	-14.1535	-14.7288	-0.5753	ExM
1715	-30.4497	-30.6144	-32.3344	-1.72	ExM
1716	-125.081	-125.825	-125.725	0.1	ExM
1717	-20.1861	-22.1991	-20.3295	1.8696	ExM
1718	-18.0137	-19.4229	-18.2939	1.129	ExM
1719	-6.0373	-6.2142	-7.8566	-1.6424	ExM
1720	-4.6583	-5.3959	-5.3089	0.087	ExM
1721	-12.1785	-12.4855	-13.5089	-1.0234	ExM
1722	-15.4871	-15.7912	-16.8256	-1.0344	ExM
1723	-22.0985	-23.0075	-22.6143	0.3932	ExM
1724	-53.9381	-54.0021	-56.7195	-2.7174	ExM
1725	-12.6847	-13.1309	-13.7065	-0.5756	ExM
1726	-13.103	-14.3799	-13.43	0.9499	ExM
1727	-14.9551	-15.0512	-17.3448	-2.2936	ExM
1728	-10.934	-11.5533	-11.707	-0.1537	ExM
1729	-11.7305	-13.3239	-11.9577	1.3662	ExM
1730	-190.875	-191.094	-192.502	-1.4083	ExM
1731	-5.2519	-6.0103	-5.8838	0.1265	ExM
1732	-4.6583	-5.3959	-5.3089	0.087	ExM
1733	-11.6194	-12.24	-12.3909	-0.1509	ExM
1734	-14.5767	-15.2222	-15.3199	-0.0977	ExM
1735	-5.0921	-6.7362	-5.3067	1.4295	ExM
1736	-5.3137	-5.5648	-6.8184	-1.2536	ExM
1737	-4.6583	-5.3959	-5.3089	0.087	ExM
1738	-5.1168	-5.5508	-6.1605	-0.6097	ExM
1739	-4.1914	-5.4255	-4.5355	0.89	ExM
1740	-5.6585	-6.6054	-6.1494	0.456	ExM
1741	-24.7639	-26.6389	-24.9303	1.7086	ExM
1742	-3.499	-5.1307	-3.7166	1.4141	ExM
1743	-4.7872	-6.5317	-4.9792	1.5525	ExM
1744	-4.9613	-6.5537	-5.1888	1.3649	ExM
1745	-5.6585	-6.6054	-6.1494	0.456	ExM
1746	-4.9613	-6.5537	-5.1888	1.3649	ExM
1747	-34.16	-36.2737	-34.2887	1.985	ExM
1748	-30.3574	-31.2144	-30.9099	0.3045	ExM
1749	-5.676	-5.7331	-8.5672	-2.8341	ExM
1750	-5.0304	-6.1603	-5.4206	0.7397	ExM
1751	-5.0921	-6.7362	-5.3067	1.4295	ExM
1752	-12.4877	-13.1088	-13.2584	-0.1496	ExM
1753	-21.9962	-22.0891	-24.4186	-2.3295	ExM
1754	-15.4823	-16.7579	-15.8097	0.9482	ExM
1755	-144.303	-144.303	-156.329	-12.026	ExM
1756	-19.6358	-21.1644	-19.8803	1.2841	ExM
1757	-12.1369	-12.4379	-13.4842	-1.0463	ExM
1758	-73.9169	-73.9715	-76.8517	-2.8802	ExM
1759	-5.6768	-5.7339	-8.5682	-2.8343	ExM
1760	-164.814	-166.087	-165.142	0.9446	ExM
1761	-69.7886	-72.0754	-69.8957	2.1797	ExM
1762	-163.476	-164.393	-163.987	0.406	ExM
1763	-19.3746	-20.6798	-19.6909	0.9889	ExM
1764	-5.6768	-5.7339	-8.5682	-2.8343	ExM
1765	-11.8997	-12.5205	-12.6708	-0.1503	ExM
1766	-5.562	-5.9076	-6.7922	-0.8846	ExM
1767	-12.0876	-12.7601	-12.8018	-0.0417	ExM
1768	-24.4008	-25.3245	-24.9067	0.4178	ExM
1769	-14.6096	-15.278	-15.328	-0.05	ExM
1770	-70.7465	-70.8114	-73.5133	-2.7019	ExM
1771	-14.5456	-15.4902	-15.0381	0.4521	ExM
1772	-383.078	-391.423	-383.078	8.3446	ExM
1773	-374.175	-382.173	-374.176	7.9967	ExM
1774	-195.298	-206.006	-195.298	10.7084	ExM
1775	-314.157	-329.268	-314.157	15.111	ExM
1776	-46.7245	-49.493	-46.7893	2.7037	ExM
1777	-5.1151	-5.5491	-6.159	-0.6099	ExM
1778	-36.2961	-36.3801	-38.815	-2.4349	ExM
1779	-14.7135	-14.8598	-16.7076	-1.8478	ExM
1780	-237.931	-242.937	-237.937	4.9992	ExM
1781	-21.4122	-23.5029	-21.5441	1.9588	ExM
1782	-194.905	-195.123	-196.537	-1.4144	ExM
1783	-232.328	-240.521	-232.329	8.1922	ExM
1784	-211.151	-217.057	-211.154	5.9033	ExM
1785	-346.171	-351.365	-346.177	5.1874	ExM
1786	-36.605	-36.8409	-38.1647	-1.3238	ExM
1787	-304.93	-334.306	-304.93	29.3759	ExM
1788	-52.6602	-55.1407	-52.7476	2.3931	ExM
1789	-81.4615	-86.1071	-81.4712	4.6359	TM
1790	-5.6625	-6.6103	-6.1528	0.4575	TM
1791	-335.017	-359.04	-335.017	24.023	TM
1792	-249.581	-260.155	-249.581	10.5749	TM
1793	-4.6616	-5.3996	-5.3117	0.0879	TM
1794	-72.3118	-74.0864	-72.4976	1.5888	TM
1795	-3.5022	-5.1347	-3.7197	1.415	TM
1796	-156.212	-161.106	-156.219	4.8868	TM
1797	-4.9671	-6.5613	-5.1941	1.3672	TM
1798	-25.6173	-26.2063	-26.4267	-0.2204	TM
1799	-4.9671	-6.5613	-5.1941	1.3672	TM
1800	-20.5244	-21.8236	-20.8429	0.9807	TM
1801	-13.0972	-14.6872	-13.3253	1.3619	TM
1802	-5.2608	-6.019	-5.8929	0.1261	TM
1803	-3.5022	-5.1347	-3.7197	1.415	TM
1804	-85.1728	-86.2563	-85.586	0.6703	TM
1805	-260.739	-274.448	-260.739	13.7088	TM
1806	-38.7892	-41.2239	-38.8809	2.343	TM
1807	-4.7908	-6.5366	-4.9826	1.554	TM
1808	-324.856	-332.005	-324.856	7.1489	TM
1809	-410.293	-416.7	-410.294	6.4056	TM
1810	-27.6967	-28.722	-28.141	0.581	TM
1811	-4.6616	-5.3996	-5.3117	0.0879	TM
1812	-255.242	-255.258	-259.394	-4.136	TM
1813	-17.8551	-19.8608	-17.9996	1.8612	TM
1814	-4.9671	-6.5613	-5.1941	1.3672	TM
1815	-10.9591	-12.5623	-11.1838	1.3785	TM
1816	-71.8817	-76.1259	-71.8961	4.2298	TM
1817	-21.5724	-22.3705	-22.1706	0.1999	TM
1818	-22.9937	-24.0372	-23.4279	0.6093	TM
1819	-133.476	-139.81	-133.478	6.3321	TM
1820	-80.1059	-80.2367	-82.205	-1.9683	TM
1821	-85.6022	-88.7676	-85.6453	3.1223	TM
1822	-12.5071	-13.8614	-12.8058	1.0556	TM
1823	-265.553	-265.638	-268.057	-2.4194	TM
1824	-4.6616	-5.3996	-5.3117	0.0879	TM
1825	-26.4277	-28.9242	-26.5137	2.4105	TM
1826	-3.5022	-5.1347	-3.7197	1.415	TM
1827	-18.8036	-20.5859	-18.9879	1.598	TM
1828	-171.458	-183.581	-171.458	12.123	TM
1829	-25.049	-26.0156	-25.5276	0.488	TM
1830	-4.7908	-6.5366	-4.9826	1.554	TM
1831	-88.2965	-94.2915	-88.299	5.9925	TM
1832	-39.2751	-42.4731	-39.3168	3.1563	TM
1833	-74.6647	-75.8303	-75.0383	0.792	TM
1834	-13.5131	-14.8769	-13.8084	1.0685	TM
1835	-5.036	-6.1675	-5.4255	0.742	TM
1836	-5.036	-6.1675	-5.4255	0.742	TM
1837	-30.316	-32.5681	-30.4272	2.1409	TM
1838	-87.6968	-88.5102	-88.2827	0.2275	TM
1839	-26.8026	-27.302	-27.7361	-0.4341	TM
1840	-5.6625	-6.6103	-6.1528	0.4575	TM
1841	-18.3724	-19.9	-18.617	1.283	TM
1842	-44.3435	-47.4898	-44.3874	3.1024	TM
1843	-19.2946	-21.2994	-19.4392	1.8602	TM
1844	-11.699	-12.6546	-12.1845	0.4701	TM
1845	-5.036	-6.1675	-5.4255	0.742	TM
1846	-13.4775	-14.1979	-14.1442	0.0537	TM
1847	-4.9671	-6.5613	-5.1941	1.3672	TM
1848	-77.2618	-79.7965	-77.3444	2.4521	TM
1849	-38.4687	-41.2046	-38.5357	2.6689	TM
1850	-15.7543	-17.1639	-16.0343	1.1296	TM
1851	-12.5335	-14.1835	-12.7467	1.4368	TM
1852	-49.8918	-53.2391	-49.9276	3.3115	TM
1853	-316.441	-316.447	-321.442	-4.9942	TM
1854	-133.037	-139.377	-133.039	6.338	TM
1855	-256.757	-263.657	-256.758	6.8989	TM
1856	-43.6264	-45.8896	-43.7363	2.1533	TM
1857	-107.191	-112.614	-107.195	5.4189	TM
1858	-4.2624	-5.5336	-4.5915	0.9421	TM
1859	-177.305	-181.97	-177.314	4.6562	TM
1860	-22.4824	-23.9066	-22.7577	1.1489	TM
1861	-129.273	-129.274	-135.571	-6.2967	TM
1862	-37.8961	-39.2498	-38.1949	1.0549	TM
1863	-365.693	-373.971	-365.693	8.2786	TM
1864	-100.345	-101.246	-100.866	0.3801	TM
1865	-50.6569	-51.6294	-51.1319	0.4975	TM
1866	-166.876	-168.637	-167.064	1.5731	TM
1867	-368.354	-368.455	-370.694	-2.2385	TM
1868	-30.2666	-31.3093	-30.7013	0.608	TM
1869	-103.538	-105.411	-103.705	1.7053	TM
1870	-75.0974	-83.5288	-75.0976	8.4312	TM
1871	-23.4184	-25.7523	-23.5203	2.232	TM
1872	-143.876	-150.478	-143.877	6.601	TM
1873	-45.4782	-47.3617	-45.6431	1.7186	TM
1874	-164.492	-164.5	-169.225	-4.7244	TM
1875	-99.5407	-104.676	-99.5466	5.1293	TM
1876	-14.3897	-15.7579	-14.6835	1.0744	TM
1877	-4.6616	-5.3996	-5.3117	0.0879	TM
1878	-14.5563	-16.4745	-14.7151	1.7594	TM
1879	-142.802	-146.644	-142.823	3.8212	TM
1880	-6.0021	-7.2654	-6.3344	0.931	TM
1881	-6.0021	-7.2654	-6.3344	0.931	TM
1882	-4.1933	-5.4276	-4.5372	0.8904	TM
1883	-109.43	-118.362	-109.43	8.9314	TM
1884	-66.3955	-66.8084	-67.4795	-0.6711	TM
1885	-18.2885	-18.6704	-19.4361	-0.7657	TM
1886	-24.7806	-24.8188	-28.0636	-3.2448	TM
1887	-20.0037	-22.0439	-20.143	1.9009	TM
1888	-4.9671	-6.5613	-5.1941	1.3672	TM
1889	-18.4635	-20.2284	-18.6513	1.5771	TM
1890	-12.1062	-13.6578	-12.3443	1.3135	TM
1891	-20.983	-23.339	-21.0826	2.2564	TM
1892	-4.9671	-6.5613	-5.1941	1.3672	TM
1893	-5.1194	-5.5535	-6.163	-0.6095	TM
1894	-12.1697	-12.7157	-13.0355	-0.3198	TM
1895	-39.8659	-41.9417	-40	1.9417	TM
1896	-14.6026	-14.6987	-16.9923	-2.2936	TM
1897	-5.0986	-6.7448	-5.3128	1.432	TM
1898	-39.5319	-41.5238	-39.6785	1.8453	TM
1899	-35.9004	-38.0214	-36.0281	1.9933	TM
1900	-6.0021	-7.2654	-6.3344	0.931	TM
1901	-5.596	-5.8921	-6.9575	-1.0654	TM
1902	-166.773	-174.421	-166.773	7.6476	TM
1903	-79.1648	-84.037	-79.1725	4.8645	TM
1904	-19.2365	-19.8996	-19.9606	-0.061	TM
1905	-310.897	-326.613	-310.897	15.7161	TM
1906	-102.26	-105.788	-102.29	3.4986	TM
1907	-85.235	-90.1674	-85.2422	4.9252	TM
1908	-12.1144	-13.666	-12.3525	1.3135	TM
1909	-116.961	-119.425	-117.05	2.3749	TM
1910	-57.4285	-57.7516	-58.7156	-0.964	TM
1911	-65.1355	-69.9959	-65.1433	4.8526	TM
1912	-136.952	-136.955	-142.67	-5.7149	TM
1913	-99.8498	-99.8507	-106.891	-7.0399	TM
1914	-432.662	-436.069	-432.696	3.3733	TM
1915	-386.512	-400.773	-386.512	14.2608	TM
1916	-20.0676	-20.8208	-20.704	0.1168	TM
1917	-33.6828	-35.6752	-33.8294	1.8458	TM
1918	-155.191	-157.317	-155.318	1.9989	TM
1919	-34.3234	-34.403	-36.8935	-2.4905	TM
1920	-251.469	-252.645	-251.838	0.8067	TM
1921	-15.2503	-17.1666	-15.4094	1.7572	TM
1922	-63.7259	-68.3036	-63.7362	4.5674	TM
1923	-12.9259	-14.0105	-13.3384	0.6721	TM
1924	-20.2667	-20.9501	-20.9697	-0.0196	TM
1925	-86.686	-90.7945	-86.7025	4.092	TM
1926	-149.237	-155.787	-149.238	6.5493	TM
1927	-4.7908	-6.5366	-4.9826	1.554	TM
1928	-10.9159	-12.5667	-11.129	1.4377	TM
1929	-4.1933	-5.4276	-4.5372	0.8904	TM
1930	-263.332	-264.074	-263.979	0.0955	TM
1931	-4.7908	-6.5366	-4.9826	1.554	TM
1932	-3.5022	-5.1347	-3.7197	1.415	TM
1933	-4.6616	-5.3996	-5.3117	0.0879	TM
1934	-31.3828	-33.5116	-31.5095	2.0021	TM
1935	-18.6338	-19.7626	-19.0245	0.7381	TM
1936	-10.9825	-12.6339	-11.1955	1.4384	TM
1937	-34.9165	-36.9036	-35.0639	1.8397	TM
1938	-41.7098	-43.8129	-41.84	1.9729	TM
1939	-49.8591	-50.4615	-50.6521	-0.1906	TM
1940	-26.1037	-28.5601	-26.1934	2.3667	TM
1941	-4.1933	-5.4276	-4.5372	0.8904	TM
1942	-5.7404	-6.5057	-6.3662	0.1395	TM
1943	-243.067	-249.365	-243.069	6.2963	TM
1944	-5.036	-6.1675	-5.4255	0.742	TM
1945	-144.176	-156.53	-144.176	12.3544	TM
1946	-57.1359	-58.2589	-57.5294	0.7295	TM
1947	-86.6925	-87.1276	-87.7343	-0.6067	TM
1948	-141.761	-166.278	-141.761	24.5167	TM
1949	-65.7682	-69.646	-65.7891	3.8569	TM
1950	-11.8326	-13.5141	-12.0385	1.4756	TM
1951	-22.3907	-23.227	-22.9587	0.2683	TM
1952	-5.7404	-6.5057	-6.3662	0.1395	TM
1953	-4.1933	-5.4276	-4.5372	0.8904	TM
1954	-364.778	-374.722	-364.778	9.9445	TM
1955	-246.638	-246.711	-249.285	-2.5738	TM
1956	-18.769	-20.1603	-19.0551	1.1052	TM
1957	-4.1933	-5.4276	-4.5372	0.8904	TM
1958	-284.569	-296.13	-284.569	11.5607	TM
1959	-4.2624	-5.5336	-4.5915	0.9421	TM
1960	-12.6279	-13.1488	-13.5293	-0.3805	TM
1961	-14.0498	-14.4888	-15.0846	-0.5958	TM
1962	-63.4013	-66.5336	-63.4459	3.0877	TM
1963	-21.3675	-21.9686	-22.1622	-0.1936	TM
1964	-22.4185	-23.5465	-22.8096	0.7369	TM
1965	-24.9535	-27.4316	-25.0411	2.3905	TM
1966	-45.9151	-48.0437	-46.0418	2.0019	TM
1967	-94.9759	-95.084	-97.2541	-2.1701	TM
1968	-98.6543	-100.769	-98.783	1.9859	TM
1969	-4.6616	-5.3996	-5.3117	0.0879	TM
1970	-105.994	-108.743	-106.06	2.6835	TM
1971	-12.1408	-13.3227	-12.5071	0.8156	TM
1972	-143.524	-159.96	-143.524	16.4358	TM
1973	-53.5162	-55.3465	-53.691	1.6555	TM
1974	-165.041	-166.388	-165.342	1.0459	TM
1975	-5.1194	-5.5535	-6.163	-0.6095	TM
1976	-4.9671	-6.5613	-5.1941	1.3672	TM
1977	-226.026	-226.038	-230.516	-4.4784	TM
1978	-108.601	-108.78	-110.407	-1.6267	TM
1979	-5.3165	-5.5676	-6.8212	-1.2536	TM
1980	-5.6625	-6.6103	-6.1528	0.4575	TM
1981	-4.7908	-6.5366	-4.9826	1.554	TM
1982	-21.7211	-22.4794	-22.3531	0.1263	TM
1983	-162.478	-162.575	-164.856	-2.2806	TM
1984	-5.5652	-5.9109	-6.7952	-0.8843	TM
1985	-28.8101	-29.8239	-29.2608	0.5631	TM
1986	-264.018	-265.781	-264.206	1.5751	TM
1987	-4.9671	-6.5613	-5.1941	1.3672	TM
1988	-5.036	-6.1675	-5.4255	0.742	TM
1989	-238.365	-238.365	-245.856	-7.491	TM
1990	-50.3261	-52.505	-50.4462	2.0588	TM
[truncated: 1,661 more rows]
