# Supplementary material for: Protein Structure, Models of Sequence Evolution, and Data Type Effects in Phylogenetic Analyses of Mitochondrial Data: A Case Study in Birds
Source: Preprints.org preprint supplement (doi:10.20944/preprints202109.0503.v1), 2021-09-29
Supplement: Supplementary file 3 [file matrix_comparisons_bird_JTTtm.xlsx]

## Sheet: DCMut calc
JTT-tm Nij (data from Table 1 and the above diagonal elements from Table 2, written as 2 symmetric half matrices)																						Mutability:
A		21	2	7	13	4	6	160	6	44	43	5	10	21	34	198	202	0	1	292	A	100
R	21		0	1	2	21	3	22	21	4	8	53	19	0	1	5	5	28	0	0	R	134.3
N	2	0		14	1	7	0	0	8	4	5	11	3	1	2	32	19	1	1	2	N	60.2
D	7	1	14		0	0	12	15	4	1	0	2	1	0	1	0	6	0	1	4	D	76.3
C	13	2	1	0		0	0	13	2	4	11	0	1	34	0	48	13	8	23	47	C	98.7
Q	4	21	7	0	0		16	1	26	1	16	6	3	0	5	7	2	0	0	7	Q	80.2
E	6	3	0	12	0	16		21	0	0	0	0	0	0	0	4	2	0	0	7	E	72.3
G	160	22	0	15	13	1	21		1	10	0	0	3	4	7	64	12	6	0	53	G	50.7
H	6	21	8	4	2	26	0	1		3	2	0	1	0	0	0	4	0	29	2	H	63.9
I	44	4	4	1	4	1	0	10	3		273	0	161	66	4	22	150	1	4	883	I	135.4
L	43	8	5	0	11	16	0	0	2	273		1	153	251	37	43	26	20	6	255	L	69.2
K	5	53	11	2	0	6	0	0	0	0	1		4	0	0	1	2	0	5	1	K	79.7
M	10	19	3	1	1	3	0	3	1	161	153	4		8	0	1	32	1	5	89	M	146.3
F	21	0	1	0	34	0	0	4	0	66	251	0	8		0	32	9	2	54	37	F	65.7
P	34	1	2	1	0	5	0	7	0	4	37	0	0	0		9	10	0	1	1	P	42.4
S	198	5	32	0	48	7	4	64	0	22	43	1	1	32	9		134	1	22	13	S	110.2
T	202	5	19	6	13	2	2	12	4	150	26	2	32	9	10	134		1	3	48	T	127.9
W	0	28	1	0	8	0	0	6	0	1	20	0	1	2	0	1	1		2	18	W	38.8
Y	1	0	1	1	23	0	0	0	29	4	6	5	5	54	1	22	3	2		2	Y	48.3
V	292	0	2	4	47	7	7	53	2	883	255	1	89	37	1	13	48	18	2		V	144.4
	0.1051	0.0157	0.0185	0.0089	0.0219	0.0141	0.0097	0.0758	0.0168	0.1188	0.1635	0.0112	0.0333	0.0777	0.026	0.0568	0.0523	0.0223	0.0324	0.1195
	A	R	N	D	C	Q	E	G	H	I	L	K	M	F	P	S	T	W	Y	V
	Mutability:
	100	134.3	60.2	76.3	98.7	80.2	72.3	50.7	63.9	135.4	69.2	79.7	146.3	65.7	42.4	110.2	127.9	38.8	48.3	144.4
JTT-tm (Q matrix, Dcmut; diagonal omitted); amino acid I = rows, amino acid j = columns
	A	R	N	D	C	Q	E	G	H	I	L	K	M	F	P	S	T	W	Y	V
A		1.96445	0.187091	0.654818	1.21609	0.374181	0.561272	14.9673	0.561272	4.116	4.02245	0.467727	0.935454	1.96445	3.18054	18.522	18.8962	0	0.0935454	27.3152
R	13.179		0	0.62757	1.25514	13.179	1.88271	13.8065	13.179	2.51028	5.02056	33.2612	11.9238	0	0.62757	3.13785	3.13785	17.572	0	0
N	1.06549	0		7.45841	0.532743	3.7292	0	0	4.26195	2.13097	2.66372	5.86018	1.59823	0.532743	1.06549	17.0478	10.1221	0.532743	0.532743	1.06549
D	7.74058	1.1058	15.4812		0	0	13.2696	16.587	4.42319	1.1058	0	2.21159	1.1058	0	1.1058	0	6.63478	0	1.1058	4.42319
C	5.83227	0.897273	0.448636	0		0	0	5.83227	0.897273	1.79455	4.935	0	0.448636	15.2536	0	21.5345	5.83227	3.58909	10.3186	21.0859
Q	2.62951	13.8049	4.60164	0	0		10.518	0.657377	17.0918	0.657377	10.518	3.94426	1.97213	0	3.28689	4.60164	1.31475	0	0	4.60164
E	6.10986	3.05493	0	12.2197	0	16.293		21.3845	0	0	0	0	0	0	0	4.07324	2.03662	0	0	7.12817
G	20.6939	2.84541	0	1.94005	1.68138	0.129337	2.71607		0.129337	1.29337	0	0	0.38801	0.517347	0.905357	8.27755	1.55204	0.77602	0	6.85485
H	3.51743	12.311	4.68991	2.34495	1.17248	15.2422	0	0.586239		1.75872	1.17248	0	0.586239	0	0	0	2.34495	0	17.0009	1.17248
I	3.64379	0.331254	0.331254	0.0828135	0.331254	0.0828135	0	0.828135	0.24844		22.6081	0	13.333	5.46569	0.331254	1.8219	12.422	0.0828135	0.331254	73.1243
L	2.58748	0.481391	0.30087	0	0.661913	0.962783	0	0	0.120348	16.4275		0.0601739	9.20661	15.1037	2.22643	2.58748	1.56452	1.20348	0.361043	15.3443
K	4.37912	46.4187	9.63407	1.75165	0	5.25495	0	0	0	0	0.875824		3.5033	0	0	0.875824	1.75165	0	4.37912	0.875824
M	2.95556	5.61556	0.886667	0.295556	0.295556	0.886667	0	0.886667	0.295556	47.5844	45.22	1.18222		2.36444	0	0.295556	9.45778	0.295556	1.47778	26.3044
F	2.65838	0	0.12659	0	4.30405	0	0	0.506358	0	8.35491	31.774	0	1.01272		0	4.05087	1.13931	0.253179	6.83584	4.68382
P	12.8714	0.378571	0.757143	0.378571	0	1.89286	0	2.65	0	1.51429	14.0071	0	0	0		3.40714	3.78571	0	0.378571	0.378571
S	34.3075	0.866352	5.54465	0	8.31698	1.21289	0.693082	11.0893	0	3.81195	7.45063	0.17327	0.17327	5.54465	1.55943		23.2182	0.17327	3.81195	2.25252
T	37.9938	0.940441	3.57368	1.12853	2.44515	0.376176	0.376176	2.25706	0.752353	28.2132	4.89029	0.376176	6.01882	1.69279	1.88088	25.2038		0.188088	0.564265	9.02824
W	0	12.2067	0.435955	0	3.48764	0	0	2.61573	0	0.435955	8.7191	0	0.435955	0.87191	0	0.435955	0.435955		0.87191	7.84719
Y	0.303774	0	0.303774	0.303774	6.98679	0	0	0	8.80943	1.21509	1.82264	1.51887	1.51887	16.4038	0.303774	6.68302	0.911321	0.607547		0.607547
V	23.9437	0	0.163998	0.327995	3.85395	0.573992	0.573992	4.34594	0.163998	72.405	20.9097	0.0819989	7.2979	3.03396	0.0819989	1.06599	3.93595	1.47598	0.163998
JTT-tm (R matrix, Dcmut, written as 2 approximately symmetric half matrices)
	A	R	N	D	C	Q	E	G	H	I	L	K	M	F	P	S	T	W	Y	V
A		125.124	10.113	73.575	55.5292	26.5377	57.8631	197.457	33.4091	34.6464	24.6021	41.7613	28.0917	25.2825	122.329	326.091	361.303	0	2.8872	228.579
R	125.395		0	70.5135	57.3123	934.679	194.094	182.144	784.463	21.1303	30.7068	2969.75	358.073	0	24.1373	55.2438	59.9971	787.98	0	0
N	10.1378	0		838.023	24.3262	264.483	0	0	253.687	17.9375	16.2918	523.23	47.9949	6.85641	40.9803	300.137	193.54	23.8898	16.4427	8.91621
D	73.6497	70.4329	836.819		0	0	1368	218.825	263.285	9.30806	0	197.464	33.2071	0	42.5307	0	126.86	0	34.1295	37.0141
C	55.4926	57.1511	24.2506	0		0	0	76.9429	53.4091	15.1056	30.1835	0	13.4726	196.314	0	379.129	111.516	160.946	318.476	176.451
Q	25.0191	879.294	248.737	0	0		1084.33	8.67252	1017.37	5.53348	64.3305	352.166	59.2232	0	126.419	81.0148	25.1387	0	0	38.5074
E	58.1338	194.582	0	1373	0	1155.53		282.118	0	0	0	0	0	0	0	71.712	38.9411	0	0	59.6499
G	196.897	181.236	0	217.983	76.7752	9.17282	280.007		7.69862	10.8869	0	0	11.652	6.65826	34.8214	145.732	29.6757	34.7991	0	57.3627
H	33.4675	784.141	253.509	263.478	53.5378	1081.01	0	7.73402		14.804	7.17111	0	17.6048	0	0	0	44.8366	0	524.72	9.81152
I	34.6698	21.099	17.9056	9.30488	15.1257	5.87329	0	10.9253	14.7881		138.276	0	400.389	70.3435	12.7405	32.0756	237.515	3.71361	10.2239	611.919
L	24.6192	30.6619	16.2632	0	30.2243	68.2825	0	0	7.16356	138.278		5.37267	276.475	194.384	85.6321	45.5542	29.9144	53.9676	11.1433	128.405
K	41.6662	2956.6	520.76	196.814	0	372.691	0	0	0	0	5.35672		105.204	0	0	15.4194	33.4923	0	135.158	7.32907
M	28.1214	357.679	47.9279	33.2085	13.4957	62.8842	0	11.6974	17.5926	400.542	276.575	105.556		30.4304	0	5.20344	180.837	13.2536	45.6104	220.121
F	25.2938	0	6.84268	0	196.532	0	0	6.68019	0	70.3276	194.336	0	30.4119		0	71.3181	21.7841	11.3533	210.983	39.1951
P	122.468	24.1128	40.9266	42.5361	0	134.245	0	34.9604	0	12.7465	85.6706	0	0	0		59.9849	72.3846	0	11.6843	3.16796
S	326.428	55.1817	299.711	0	379.771	86.0208	71.4517	146.297	0	32.0871	45.5696	15.4706	5.20332	71.3598	59.9782		443.943	7.76997	117.653	18.8495
T	361.502	59.9007	193.172	126.801	111.651	26.6792	38.7811	29.7765	44.7829	237.485	29.9101	33.5872	180.745	21.7863	72.3416	443.729		8.43445	17.4156	75.5501
W	0	777.499	23.5651	0	159.253	0	0	34.5083	0	3.66966	53.3278	0	13.0917	11.2215	0	7.67527	8.33566		26.9108	65.6669
Y	2.89033	0	16.4202	34.1319	319.032	0	0	0	524.371	10.2281	11.1477	135.613	45.6116	211.117	11.6836	117.659	17.4249	27.2443		5.08408
V	227.818	0	8.86474	36.8534	175.979	40.7087	59.1744	57.3343	9.76177	609.47	127.888	7.32133	219.156	39.0471	3.1538	18.7673	75.2571	66.1874	5.06166
JTT-tm (R matrix, Dcmut, written as half matrix, values averaged from B53:U72)
A
R	125.259
N	10.1254	0
D	73.6123	70.4732	837.421
C	55.5109	57.2317	24.2884	0
Q	25.7784	906.987	256.61	0	0
E	57.9984	194.338	0	1370.5	0	1119.93
G	197.177	181.69	0	218.404	76.8591	8.92267	281.062
H	33.4383	784.302	253.598	263.382	53.4734	1049.19	0	7.71632
I	34.6581	21.1146	17.9215	9.30647	15.1157	5.70339	0	10.9061	14.7961
L	24.6107	30.6843	16.2775	0	30.2039	66.3065	0	0	7.16734	138.277
K	41.7138	2963.18	521.995	197.139	0	362.429	0	0	0	0	5.3647
M	28.1065	357.876	47.9614	33.2078	13.4841	61.0537	0	11.6747	17.5987	400.466	276.525	105.38
F	25.2882	0	6.84955	0	196.423	0	0	6.66923	0	70.3355	194.36	0	30.4212
P	122.398	24.1251	40.9534	42.5334	0	130.332	0	34.8909	0	12.7435	85.6514	0	0	0
S	326.259	55.2128	299.924	0	379.45	83.5178	71.5818	146.014	0	32.0814	45.5619	15.445	5.20338	71.3389	59.9816
T	361.402	59.9489	193.356	126.831	111.583	25.9089	38.8611	29.7261	44.8098	237.5	29.9122	33.5398	180.791	21.7852	72.3631	443.836
W	0	782.74	23.7275	0	160.099	0	0	34.6537	0	3.69163	53.6477	0	13.1727	11.2874	0	7.72262	8.38506
Y	2.88877	0	16.4314	34.1307	318.754	0	0	0	524.545	10.226	11.1455	135.386	45.611	211.05	11.684	117.656	17.4202	13.6221
V	228.199	0	8.89047	36.9338	176.215	39.608	59.4122	57.3485	9.78665	610.694	128.146	7.3252	219.638	39.1211	3.16088	18.8084	75.4036	65.9271	5.07287
	0.1051	0.0157	0.0185	0.0089	0.0219	0.0141	0.0097	0.0758	0.0168	0.1188	0.1635	0.0112	0.0333	0.0777	0.026	0.0568	0.0523	0.0223	0.0324	0.1195
	A	R	N	D	C	Q	E	G	H	I	L	K	M	F	P	S	T	W	Y	V
	max Rij =	2963.18
JTT-tm (R matrix, Dcmut, written as half matrix, values normalized so max exchangeability = 100)
A
R	4.2272
N	0.341708	0
D	2.48424	2.3783	28.2609
C	1.87336	1.93143	0.819674	0
Q	0.869958	30.6086	8.65996	0	0
E	1.95731	6.55842	0	46.251	0	37.7949
G	6.65425	6.1316	0	7.37061	2.59381	0.301118	9.48517
H	1.12846	26.4683	8.55831	8.88848	1.8046	35.4075	0	0.260407
I	1.16963	0.712567	0.604808	0.314071	0.510117	0.192475	0	0.368054	0.499331
L	0.83055	1.03552	0.549327	0	1.01931	2.23768	0	0	0.24188	4.66651
K	1.40774	100	17.6161	6.65296	0	12.2311	0	0	0	0	0.181045
M	0.948527	12.0774	1.61858	1.12068	0.455056	2.06041	0	0.393993	0.593912	13.5147	9.33204	3.55631
F	0.853414	0	0.231155	0	6.6288	0	0	0.22507	0	2.37365	6.55918	0	1.02664
P	4.13065	0.814162	1.38208	1.4354	0	4.39838	0	1.17748	0	0.430063	2.89052	0	0	0
S	11.0105	1.8633	10.1217	0	12.8055	2.81852	2.41571	4.92762	0	1.08267	1.5376	0.521231	0.175601	2.40751	2.02423
T	12.1965	2.02313	6.52528	4.28022	3.76566	0.874363	1.31147	1.00318	1.51222	8.01504	1.00946	1.13188	6.10126	0.735196	2.44208	14.9784
W	0	26.4156	0.800745	0	5.40296	0	0	1.16948	0	0.124584	1.81048	0	0.444546	0.380923	0	0.26062	0.282975
Y	0.0974888	0	0.554521	1.15183	10.7572	0	0	0	17.7021	0.345102	0.376133	4.56893	1.53926	7.12241	0.394305	3.97059	0.58789	0.459714
V	7.70115	0	0.300032	1.24642	5.94683	1.33667	2.00502	1.93537	0.330275	20.6094	4.32463	0.247208	7.41226	1.32024	0.106672	0.634738	2.54469	2.22488	0.171197
	0.1051	0.0157	0.0185	0.0089	0.0219	0.0141	0.0097	0.0758	0.0168	0.1188	0.1635	0.0112	0.0333	0.0777	0.026	0.0568	0.0523	0.0223	0.0324	0.1195
	A	R	N	D	C	Q	E	G	H	I	L	K	M	F	P	S	T	W	Y	V

## Sheet: R matrices
JTTtm-DCMut (symmetric half matrix, normalized to a maximum of 100 with maximum exchangability highlighted)																						Color Key:
A																						Cutoff	RGB hex
R	4.2272																					1	FFE2E2
N	0.341708	0																				5	FFBBBB
D	2.48424	2.3783	28.2609																			10	FF9999
C	1.87336	1.93143	0.819674	0																		20	FF5555
Q	0.869958	30.6086	8.65996	0	0																	50	FF0000
E	1.95731	6.55842	0	46.251	0	37.7949
G	6.65425	6.1316	0	7.37061	2.59381	0.301118	9.48517
H	1.12846	26.4683	8.55831	8.88848	1.8046	35.4075	0	0.260407
I	1.16963	0.712567	0.604808	0.314071	0.510117	0.192475	0	0.368054	0.499331
L	0.83055	1.03552	0.549327	0	1.01931	2.23768	0	0	0.24188	4.66651
K	1.40774	100	17.6161	6.65296	0	12.2311	0	0	0	0	0.181045
M	0.948527	12.0774	1.61858	1.12068	0.455056	2.06041	0	0.393993	0.593912	13.5147	9.33204	3.55631
F	0.853414	0	0.231155	0	6.6288	0	0	0.22507	0	2.37365	6.55918	0	1.02664
P	4.13065	0.814162	1.38208	1.4354	0	4.39838	0	1.17748	0	0.430063	2.89052	0	0	0
S	11.0105	1.8633	10.1217	0	12.8055	2.81852	2.41571	4.92762	0	1.08267	1.5376	0.521231	0.175601	2.40751	2.02423
T	12.1965	2.02313	6.52528	4.28022	3.76566	0.874363	1.31147	1.00318	1.51222	8.01504	1.00946	1.13188	6.10126	0.735196	2.44208	14.9784
W	0	26.4156	0.800745	0	5.40296	0	0	1.16948	0	0.124584	1.81048	0	0.444546	0.380923	0	0.26062	0.282975
Y	0.0974888	0	0.554521	1.15183	10.7572	0	0	0	17.7021	0.345102	0.376133	4.56893	1.53926	7.12241	0.394305	3.97059	0.58789	0.459714
V	7.70115	0	0.300032	1.24642	5.94683	1.33667	2.00502	1.93537	0.330275	20.6094	4.32463	0.247208	7.41226	1.32024	0.106672	0.634738	2.54469	2.22488	0.171197
	0.1051	0.0157	0.0185	0.0089	0.0219	0.0141	0.0097	0.0758	0.0168	0.1188	0.1635	0.0112	0.0333	0.0777	0.026	0.0568	0.0523	0.0223	0.0324	0.1195
	A	R	N	D	C	Q	E	G	H	I	L	K	M	F	P	S	T	W	Y	V
mtTM (ML estimate of R matrix obtained from transmembrane helices, maximum value = 100)
A
R	1.85333
N	0.000295	24.3432
D	2.90347	0.000635	86.819
C	0.0001	29.1691	1.49689	3.99318
Q	0.0001	49.0452	0.928104	7.06486	4.03818
E	1.09134	0.00013	1.10321	78.7002	0.0001	15.177
G	3.69008	6.99299	6.04386	9.21877	1.4079	0.0001	4.78025
H	0.0001	36.8266	29.3009	8.48267	19.2108	79.6227	0.0001	0.0001
I	2.3792	0.0001	0.383922	0.233987	0.386002	0.0001	0.0001	0.0001	0.078696
L	0.169253	3.52325	0.183326	0.0001	0.0001	1.2301	0.0001	0.007496	0.949872	8.1125
K	0.0001	4.52455	68.5206	13.501	0.000111	27.2073	20.2858	0.0001	1.8612	0.260907	0.534588
M	6.29819	0.0001	0.0001	0.0001	0.0001	0.368363	0.0001	0.142541	0.099383	15.6587	20.2223	1.10455
F	0.215278	0.0001	0.0001	0.56261	1.72378	0.14756	0.0001	0.035535	0.248265	0.887913	14.0087	0.13998	0.0001
P	1.2822	8.65696	0.0001	2.05065	0.210888	14.6989	0.0001	0.0001	4.00211	0.033442	2.81297	2.30967	0.0001	1.55983
S	17.8934	6.18229	59.5345	7.6084	63.6284	1.39655	0.028734	9.13813	1.0492	0.36734	2.80624	0.492856	0.100581	7.19061	16.1833
T	57.6116	0.0001	6.28081	0.188983	0.0001	0.789322	0.0001	0.0001	1.19387	24.6561	1.0976	2.91578	42.1491	0.145066	3.13262	22.7942
W	0.0001	32.9254	0.0001	0.0001	6.88172	0.343013	0.0001	0.31503	0.0001	0.0001	0.191211	0.0001	0.124282	0.0001	0.0001	0.236098	0.0001
Y	0.0001	13.0869	4.09546	6.76261	55.1389	13.0666	0.0001	0.15415	100	0.165785	0.139473	0.0001	0.061154	25.837	0.176205	3.16314	0.297528	0.594403
V	30.5969	0.0001	0.0001	0.985961	0.0001	0.0001	0.959556	0.315196	0.097423	100	4.22887	0.0001	41.9585	0.662406	0.00014	0.110617	15.8767	0.0001	0.234116
	0.099288	0.002371	0.014236	0.004119	0.00909	0.010783	0.011178	0.057695	0.019518	0.100756	0.234721	0.008111	0.050265	0.077757	0.040425	0.072407	0.08533	0.031604	0.0253	0.045045
	A	R	N	D	C	Q	E	G	H	I	L	K	M	F	P	S	T	W	Y	V
mtExM (ML estimate of R matrix obtained from extramembrane loops, maximum value = 100)
A
R	0.141858
N	0.202217	0.666003
D	0.405023	0.169164	22.8856
C	2.39704	12.8245	0.998264	0.481677
Q	0.069011	10.0969	0.253075	0.082659	0.0001
E	0.961188	0.0001	0.190833	14.2244	0.0001	3.35968
G	4.07709	1.37962	4.16767	4.8829	5.84294	0.087588	3.62231
H	0.0001	11.7923	9.06592	1.21396	20.105	21.1605	0.064756	0.035749
I	4.27464	0.0001	0.666626	0.017569	0.57131	0.0001	0.0001	0.01919	0.084832
L	0.601849	0.39719	0.0001	0.0001	0.376103	1.98741	0.0001	0.0001	1.27833	10.3468
K	0.023415	0.13962	7.58934	0.0001	0.0001	6.22109	5.21595	0.411681	0.049187	0.0001	0.061691
M	6.17339	0.0001	0.103824	0.0001	0.0001	0.464045	0.0001	0.0001	0.0001	21.174	20.4417	1.94418
F	0.169017	0.0001	0.019641	0.0001	4.87578	0.0001	0.0001	0.0001	0.954745	2.63593	23.4198	0.0001	0.0001
P	1.41741	0.762481	0.0001	0.0001	0.834533	5.78793	0.0001	0.0001	5.20792	0.0001	6.02033	0.13977	0.205538	0.63313
S	14.0303	0.227501	19.4854	0.742345	17.9777	0.908412	0.14625	8.55551	3.16283	0.077517	3.96807	0.520156	0.814959	6.42057	17.3221
T	41.4669	0.033436	4.71078	0.090233	0.538095	0.263909	0.059274	0.0001	0.547895	21.602	0.890172	1.26122	29.1517	0.186143	4.65176	16.5503
W	0.0001	1.79632	0.0001	0.0001	6.84072	1.08504	0.0001	0.257859	0.0001	0.0001	0.596388	0.0001	0.303185	0.0001	0.0001	0.315166	0.0001
Y	0.0001	0.004044	1.77427	0.293189	37.3056	0.300691	0.120688	0.0001	65.2074	0.105147	0.337569	0.097325	0.0001	30.4581	0.065079	2.56685	0.090702	0.977146
V	21.9122	0.0001	0.0001	0.352372	0.0001	0.130826	0.662368	0.389223	0.0001	100	3.07267	0.12661	43.0947	0.672095	0.374518	0.0001	8.71402	0.0001	0.234116
	0.057905	0.035589	0.057933	0.030167	0.005202	0.043148	0.039093	0.048416	0.040609	0.056825	0.115368	0.040963	0.038517	0.035456	0.083697	0.079129	0.102992	0.024765	0.031929	0.032296
	A	R	N	D	C	Q	E	G	H	I	L	K	M	F	P	S	T	W	Y	V
mtVer (Le, V. S., Dang, C. C., & Le, Q. S. 2017. Improved mitochondrial amino acid substitution models for metazoan evolutionary studies. BMC Evol Biol, 17(1), 1-13. doi: 10.1186/s12862-017-0987-y, normalized so max = 100)																							Raw mtVer matrix from https://github.com/vinhbio/mt_metazoan_models
A																												max -->	13.5051
R	0.478963																						0.0646846
N	0.239252	1.13403																					0.0323114	0.153153
D	1.18064	0.450733	64.8679																				0.159447	0.0608721	8.76049
C	1.82563	9.06075	2.48897	0.898119																			0.246554	1.22367	0.336139	0.121292
Q	0.228584	23.4754	2.90976	0.617085	0.860215																		0.0308705	3.17039	0.392967	0.0833382	0.116173
E	1.4209	0.698666	2.48597	48.8972	0.269668	14.9435																	0.191894	0.0943558	0.335734	6.60364	0.0364191	2.01814
G	8.1021	2.16563	4.19771	7.39908	6.78901	0.314791	8.60943																1.0942	0.292471	0.566907	0.999256	0.916865	0.042513	1.16272
H	0.172484	16.3252	18.2321	6.05778	10.3457	31.7119	0.600819	0.0987272															0.0232942	2.20473	2.46227	0.818112	1.39721	4.28273	0.0811414	0.0133332
I	3.05428	0.00868689	0.935907	0.0181414	0.499903	0.0309444	0.00928853	0.0231199	0.164678														0.412485	0.00117318	0.126396	0.00245002	0.0675125	0.00417909	0.00125443	0.00312238	0.02224
L	0.578857	0.583644	0.0334934	0.01706	1.26613	1.86287	0.0558885	0.0520589	1.10076	10.2108													0.0781755	0.0788219	0.00452332	0.00230398	0.170993	0.251584	0.00754783	0.00703063	0.14866	1.37898
K	0.153911	3.10148	18.2021	0.144596	0.183453	14.8218	15.9508	0.787653	1.30622	0.0431396	0.164652												0.0207858	0.418858	2.45822	0.0195278	0.0247756	2.0017	2.15418	0.106374	0.176407	0.00582606	0.0222365
M	5.56737	0.0247271	0.2691	0.0403895	0.626176	0.875963	0.480848	0.255027	0.180241	20.0597	22.9731	3.26418											0.75188	0.00333943	0.0363423	0.00545465	0.0845659	0.1183	0.0649391	0.0344417	0.0243418	2.70908	3.10255	0.440832
F	0.4772	0.0183701	0.076319	0.0432951	7.93735	0.0935083	0.00246528	0.115273	1.28369	3.82089	17.7963	0.0770747	0.917388										0.0644465	0.00248091	0.010307	0.00584706	1.07195	0.0126284	0.00033294	0.0155678	0.173364	0.516016	2.40342	0.010409	0.123895
P	2.11452	1.65201	0.255283	0.203763	0.139973	6.80044	0.203594	0.0137641	5.03131	0.136872	2.71606	1.05017	0.22855	0.51996									0.285569	0.223106	0.0344763	0.0275185	0.0189036	0.918408	0.0274956	0.00185886	0.679485	0.0184847	0.366808	0.141827	0.0308659	0.0702213
S	18.3768	1.00039	28.543	2.75248	24.8731	1.80603	0.723797	9.23562	3.29718	0.326876	3.26296	1.38841	1.01571	6.56583	14.5233								2.48182	0.135104	3.85478	0.371726	3.35915	0.243907	0.0977497	1.24728	0.445289	0.044145	0.440667	0.187506	0.137173	0.886724	1.96139
T	41.1895	0.212091	6.40825	0.669835	1.12781	0.841174	0.703845	0.0630789	1.11441	18.0611	1.2833	2.96	27.6695	0.459033	4.24881	21.0688							5.5627	0.0286432	0.865443	0.0904622	0.152313	0.113602	0.0950552	0.0085189	0.150503	2.43918	0.173311	0.399752	3.7368	0.061993	0.573808	2.84537
W	0.0623692	4.13576	0.0494368	0.199452	13.1717	0.91974	0.461612	1.91517	0.226703	0.0140772	1.37998	0.217618	0.420879	0.680533	0.148158	1.06686	0.0235921						0.00842305	0.558541	0.0066765	0.0269363	1.77886	0.124212	0.0623414	0.258646	0.0306166	0.00190114	0.186368	0.0293896	0.0568402	0.0919069	0.0200089	0.144081	0.00318614
Y	0.0924458	1.08361	6.34551	1.37968	38.8609	1.69442	0.276607	0.155846	67.9431	0.336389	0.765224	0.459356	0.589532	29.524	0.532613	4.02193	0.624712	2.1351					0.0124849	0.146343	0.856969	0.186328	5.24822	0.228833	0.0373561	0.0210472	9.17581	0.0454298	0.103345	0.0620367	0.079617	3.98726	0.0719301	0.543167	0.0843683	0.288348
V	23.672	0.278633	0.102155	0.949327	2.82752	0.0787333	1.60132	3.28018	0.0204364	100	6.34025	0.186993	33.3156	2.48912	0.190802	0.431547	9.75873	0.34931	0.212411				3.19694	0.0376297	0.0137962	0.128208	0.38186	0.010633	0.216261	0.442993	0.00275996	13.5051	0.856259	0.0252537	4.49932	0.336159	0.0257681	0.058281	1.31793	0.0471748	0.0286864
	0.0708203	0.0140499	0.0452099	0.0147937	0.0068142	0.0263409	0.0214952	0.04424	0.024231	0.0907351	0.17231	0.0273812	0.056194	0.0497758	0.0543863	0.0744219	0.10881	0.0256527	0.0264847	0.0458537			0.0708203	0.0140499	0.0452099	0.0147937	0.0068142	0.0263409	0.0214952	0.04424	0.024231	0.0907351	0.17231	0.0273812	0.056194	0.0497758	0.0543863	0.0744219	0.10881	0.0256527	0.0264847	0.0458537
	A	R	N	D	C	Q	E	G	H	I	L	K	M	F	P	S	T	W	Y	V

## Sheet: R mat comparisons
Index	Exchange	JTTtm-DCMut	mtTM	mtExM	mtVer		norm JTTtm	norm mtTM	norm mtExM	norm mtVer		diff mtTM-JTTtm	diff mtTM-mtExM	diff mtTM-mtVer		diff mtExM-mtVer
181	I<->V	20.6094	100	100	100		0.0260196	0.0631527	0.117837	0.0910718		0.0371331	-0.0546844	-0.0279191		0.0267653
184	M<->V	7.41226	41.9585	43.0947	33.3156		0.00935805	0.0264979	0.0507815	0.0303412		0.0171399	-0.0242836	-0.00384322		0.0204404
167	F<->Y	7.12241	25.837	30.4581	29.524		0.00899211	0.0163168	0.035891	0.0268881		0.00732465	-0.0195742	-0.0105713		0.00900291
89	L<->F	6.55918	14.0087	23.4198	17.7963		0.00828103	0.00884688	0.0275972	0.0162074		0.00056585	-0.0187503	-0.00736056		0.0113898
76	I<->M	13.5147	15.6587	21.174	20.0597		0.0170625	0.00988887	0.0249508	0.0182687		-0.00717362	-0.0150619	-0.00837982		0.00668211
162	H<->Y	17.7021	100	65.2074	67.9431		0.0223491	0.0631527	0.0768385	0.061877		0.0408036	-0.0136858	0.00127572		0.0149616
121	A<->T	12.1965	57.6116	41.4669	41.1895		0.0153981	0.0363833	0.0488634	0.037512		0.0209852	-0.0124801	-0.0011287		0.0113514
33	C<->H	1.8046	19.2108	20.105	10.3457		0.00227832	0.0121321	0.0236911	0.00942206		0.00985382	-0.011559	0.00271009		0.0142691
77	L<->M	9.33204	20.2223	20.4417	22.9731		0.0117818	0.0127709	0.0240879	0.020922		0.000989137	-0.011317	-0.00815109		0.00316587
120	P<->S	2.02423	16.1833	17.3221	14.5233		0.00255561	0.0102202	0.0204119	0.0132267		0.00766458	-0.0101917	-0.00300647		0.00718525
130	I<->T	8.01504	24.6561	21.602	18.0611		0.0101191	0.015571	0.0254551	0.0164486		0.00545193	-0.00988416	-0.000877589		0.00900657
158	C<->Y	10.7572	55.1389	37.3056	38.8609		0.013581	0.0348217	0.0439598	0.0353913		0.0212407	-0.00913807	-0.000569598		0.00856847
133	M<->T	6.10126	42.1491	29.1517	27.6695		0.0077029	0.0266183	0.0343515	0.0251991		0.0189154	-0.00773321	0.00141917		0.00915239
55	I<->L	4.66651	8.1125	10.3468	10.2108		0.00589151	0.00512327	0.0121923	0.00929915		-0.000768248	-0.00706907	-0.00417588		0.00289318
172	A<->V	7.70115	30.5969	21.9122	23.672		0.00972277	0.0193228	0.0258207	0.0215585		0.00959998	-0.00649796	-0.00223577		0.00426219
26	C<->G	2.59381	1.4079	5.84294	6.78901		0.0032747	0.000889125	0.00688515	0.00618287		-0.00238558	-0.00599602	-0.00529375		0.000702278
102	L<->P	2.89052	2.81297	6.02033	2.71606		0.00364931	0.00177647	0.00709418	0.00247357		-0.00187284	-0.00531772	-0.000697101		0.00462061
106	A<->S	11.0105	17.8934	14.0303	18.3768		0.0139008	0.0113002	0.0165329	0.0167361		-0.00260063	-0.00523271	-0.00543594		-0.000203236
136	S<->T	14.9784	22.7942	16.5503	21.0688		0.0189104	0.0143952	0.0195024	0.0191877		-0.00451517	-0.00510725	-0.00479257		0.000314681
83	C<->F	6.6288	1.72378	4.87578	7.93735		0.00836892	0.00108861	0.00574548	0.00722869		-0.00728031	-0.00465687	-0.00614007		-0.0014832
113	G<->S	4.92762	9.13813	8.55551	9.23562		0.00622117	0.00577098	0.0100816	0.00841104		-0.00045019	-0.00431058	-0.00264007		0.00167052
141	C<->W	5.40296	6.88172	6.84072	13.1717		0.00682129	0.00434599	0.00806091	0.0119957		-0.00247529	-0.00371491	-0.00764973		-0.00393481
100	H<->P	0	4.00211	5.20792	5.03131		0	0.00252744	0.00613686	0.0045821		0.00252744	-0.00360942	-0.00205466		0.00155476
37	A<->I	1.16963	2.3792	4.27464	3.05428		0.00147666	0.00150253	0.00503712	0.00278159		2.5863e-05	-0.00353459	-0.00127906		0.00225553
135	P<->T	2.44208	3.13262	4.65176	4.24881		0.00308315	0.00197833	0.0054815	0.00386947		-0.00110481	-0.00350317	-0.00189114		0.00161203
67	A<->M	0.948527	6.29819	6.17339	5.56737		0.00119752	0.00397748	0.00727454	0.0050703		0.00277995	-0.00329707	-0.00109282		0.00220424
114	H<->S	0	1.0492	3.16283	3.29718		0	0.000662599	0.00372698	0.0030028		0.000662599	-0.00306439	-0.0023402		0.000724181
119	F<->S	2.40751	7.19061	6.42057	6.56583		0.00303951	0.00454107	0.00756581	0.00597962		0.00150156	-0.00302474	-0.00143855		0.00158619
116	L<->S	1.5376	2.80624	3.96807	3.26296		0.00194124	0.00177222	0.00467585	0.00297163		-0.00016902	-0.00290364	-0.00119942		0.00170422
7	A<->C	1.87336	0.0001	2.39704	1.82563		0.00236513	6.31527e-08	0.0028246	0.00166263		-0.00236507	-0.00282454	-0.00166257		0.00116197
88	I<->F	2.37365	0.887913	2.63593	3.82089		0.00299676	0.000560741	0.00310611	0.00347975		-0.00243601	-0.00254537	-0.00291901		-0.000373646
22	A<->G	6.65425	3.69008	4.07709	8.1021		0.00840104	0.00233039	0.00480433	0.00737873		-0.00607066	-0.00247394	-0.00504834		-0.00257441
78	K<->M	3.55631	1.10455	1.94418	3.26418		0.00448987	0.000697553	0.00229097	0.00297275		-0.00379232	-0.00159341	-0.00227519		-0.00068178
123	N<->T	6.52528	6.28081	4.71078	6.40825		0.00823822	0.0039665	0.00555105	0.00583611		-0.00427172	-0.00158455	-0.00186961		-0.000285057
51	Q<->L	2.23768	1.2301	1.98741	1.86287		0.00282509	0.00077684	0.00234191	0.00169655		-0.00204825	-0.00156507	-0.000919713		0.000645355
28	E<->G	9.48517	4.78025	3.62231	8.60943		0.0119751	0.00301886	0.00426842	0.00784076		-0.00895625	-0.00124957	-0.00482191		-0.00357234
24	N<->G	0	6.04386	4.16767	4.19771		0	0.00381686	0.00491106	0.00382293		0.00381686	-0.0010942	-6.07099e-06		0.00108813
142	Q<->W	0	0.343013	1.08504	0.91974		0	0.000216622	0.00127858	0.000837624		0.000216622	-0.00106196	-0.000621002		0.000440955
169	S<->Y	3.97059	3.16314	2.56685	4.02193		0.00501291	0.00199761	0.0030247	0.00366284		-0.0030153	-0.00102709	-0.00166523		-0.000638138
87	H<->F	0	0.248265	0.954745	1.28369		0	0.000156786	0.00112504	0.00116908		0.000156786	-0.000968258	-0.00101229		-4.40342e-05
182	L<->V	4.32463	4.22887	3.07267	6.34025		0.00545988	0.00267065	0.00362074	0.00577418		-0.00278923	-0.000950096	-0.00310353		-0.00215344
54	H<->L	0.24188	0.949872	1.27833	1.10076		0.000305376	0.00059987	0.00150635	0.00100248		0.000294494	-0.000906478	-0.000402615		0.000503863
118	M<->S	0.175601	0.100581	0.814959	1.01571		0.000221698	6.35196e-05	0.000960324	0.000925024		-0.000158179	-0.000896804	-0.000861504		3.53001e-05
92	A<->P	4.13065	1.2822	1.41741	2.11452		0.00521498	0.000809747	0.00167024	0.00192573		-0.00440523	-0.000860493	-0.00111599		-0.000255495
96	C<->P	0	0.210888	0.834533	0.139973		0	0.000133181	0.000983389	0.000127476		0.000133181	-0.000850208	5.70512e-06		0.000855913
171	W<->Y	0.459714	0.594403	0.977146	2.1351		0.000580393	0.000375382	0.00115144	0.00194447		-0.000205011	-0.000776059	-0.00156909		-0.000793034
125	C<->T	3.76566	0.0001	0.538095	1.12781		0.00475418	6.31527e-08	0.000634076	0.00102712		-0.00475411	-0.000634012	-0.00102706		-0.000393045
46	A<->L	0.83055	0.169253	0.601849	0.578857		0.00104858	0.000106888	0.000709201	0.000527176		-0.000941689	-0.000602314	-0.000420288		0.000182026
147	L<->W	1.81048	0.191211	0.596388	1.37998		0.00228575	0.000120755	0.000702766	0.00125677		-0.00216499	-0.000582011	-0.00113601		-0.000554002
39	N<->I	0.604808	0.383922	0.666626	0.935907		0.000763576	0.000242457	0.000785533	0.000852347		-0.000521119	-0.000543076	-0.00060989		-6.68147e-05
63	G<->K	0	0.0001	0.411681	0.787653		0	6.31527e-08	0.000485113	0.00071733		6.31527e-08	-0.00048505	-0.000717267		-0.000232217
16	A<->E	1.95731	1.09134	0.961188	1.4209		0.00247112	0.000689209	0.00113264	0.00129404		-0.00178191	-0.000443427	-0.000604828		-0.000161401
50	C<->L	1.01931	0.0001	0.376103	1.26613		0.00128689	6.31527e-08	0.000443189	0.00115309		-0.00128682	-0.000443126	-0.00115303		-0.000709901
186	P<->V	0.106672	0.00014	0.374518	0.190802		0.000134674	8.84138e-08	0.000441321	0.000173767		-0.000134586	-0.000441233	-0.000173678		0.000267554
41	C<->I	0.510117	0.386002	0.57131	0.499903		0.000644027	0.000243771	0.000673215	0.00045527		-0.000400256	-0.000429444	-0.0002115		0.000217945
185	F<->V	1.32024	0.662406	0.672095	2.48912		0.00166682	0.000418327	0.000791977	0.00226689		-0.00124849	-0.00037365	-0.00184856		-0.00147491
131	L<->T	1.00946	1.0976	0.890172	1.2833		0.00127446	0.000693161	0.00104895	0.00116872		-0.000581296	-0.000355792	-0.00047556		-0.000119768
72	Q<->M	2.06041	0.368363	0.464045	0.875963		0.00260129	0.000232631	0.000546817	0.000797756		-0.00236866	-0.000314186	-0.000565124		-0.000250938
164	L<->Y	0.376133	0.139473	0.337569	0.765224		0.000474871	8.8081e-05	0.000397782	0.000696903		-0.00038679	-0.000309701	-0.000608822		-0.000299122
117	K<->S	0.521231	0.492856	0.520156	1.38841		0.000658059	0.000311252	0.000612937	0.00126445		-0.000346807	-0.000301685	-0.000953196		-0.000651511
149	M<->W	0.444546	0.124282	0.303185	0.420879		0.000561243	7.84875e-05	0.000357264	0.000383302		-0.000482755	-0.000278777	-0.000304814		-2.60373e-05
179	G<->V	1.93537	0.315196	0.389223	3.28018		0.00244342	0.000199055	0.000458649	0.00298732		-0.00224437	-0.000259594	-0.00278826		-0.00252867
104	M<->P	0	0.0001	0.205538	0.22855		0	6.31527e-08	0.0002422	0.000208144		6.31527e-08	-0.000242137	-0.000208081		3.40558e-05
188	T<->V	2.54469	15.8767	8.71402	9.75873		0.00321269	0.0100266	0.0102683	0.00888745		0.0068139	-0.000241753	0.00113914		0.00138089
2	A<->N	0.341708	0.000295	0.202217	0.239252		0.00043141	1.86301e-07	0.000238287	0.000217891		-0.000431223	-0.0002381	-0.000217705		2.03952e-05
9	N<->C	0.819674	1.49689	0.998264	2.48897		0.00103485	0.000945324	0.00117633	0.00226675		-8.95222e-05	-0.000231002	-0.00132143		-0.00109042
152	S<->W	0.26062	0.236098	0.315166	1.06686		0.000329034	0.000149102	0.000371382	0.000971611		-0.000179932	-0.00022228	-0.000822509		-0.000600228
5	R<->D	2.3783	0.000635	0.169164	0.450733		0.00300262	4.0102e-07	0.000199338	0.000410491		-0.00300222	-0.000198937	-0.00041009		-0.000211153
111	Q<->S	2.81852	1.39655	0.908412	1.80603		0.00355841	0.000881959	0.00107045	0.00164478		-0.00267645	-0.000188488	-0.000762824		-0.000574336
178	E<->V	2.00502	0.959556	0.662368	1.60132		0.00253135	0.000605986	0.000780515	0.00145835		-0.00192536	-0.00017453	-0.000852368		-0.000677838
112	E<->S	2.41571	0.028734	0.14625	0.723797		0.00304986	1.81463e-05	0.000172337	0.000659175		-0.00303171	-0.00015419	-0.000641028		-0.000486838
177	Q<->V	1.33667	0.0001	0.130826	0.0787333		0.00168756	6.31527e-08	0.000154162	7.17039e-05		-0.0016875	-0.000154098	-7.16407e-05		8.24577e-05
183	K<->V	0.247208	0.0001	0.12661	0.186993		0.000312102	6.31527e-08	0.000149194	0.000170298		-0.000312039	-0.00014913	-0.000170235		-2.11047e-05
160	E<->Y	0	0.0001	0.120688	0.276607		0	6.31527e-08	0.000142215	0.000251911		6.31527e-08	-0.000142152	-0.000251847		-0.000109695
190	Y<->V	0.171197	0.234116	0.234116	0.212411		0.000216138	0.000147851	0.000275876	0.000193446		-6.82869e-05	-0.000128025	-4.55957e-05		8.24292e-05
134	F<->T	0.735196	0.145066	0.186143	0.459033		0.000928192	9.16131e-05	0.000219346	0.000418049		-0.000836579	-0.000127732	-0.000326436		-0.000198704
69	N<->M	1.61858	0.0001	0.103824	0.2691		0.00204347	6.31527e-08	0.000122343	0.000245074		-0.00204341	-0.00012228	-0.000245011		-0.000122731
165	K<->Y	4.56893	0.0001	0.097325	0.459356		0.00576832	6.31527e-08	0.000114685	0.000418344		-0.00576826	-0.000114622	-0.000418281		-0.000303659
144	G<->W	1.16948	0.31503	0.257859	1.91517		0.00147648	0.00019895	0.000303854	0.00174418		-0.00127753	-0.000104904	-0.00154523		-0.00144032
27	Q<->G	0.301118	0.0001	0.087588	0.314791		0.000380164	6.31527e-08	0.000103211	0.000286686		-0.000380101	-0.000103148	-0.000286623		-0.000183475
11	A<->Q	0.869958	0.0001	0.069011	0.228584		0.00109833	6.31527e-08	8.13206e-05	0.000208175		-0.00109827	-8.12574e-05	-0.000208112		-0.000126855
35	E<->H	0	0.0001	0.064756	0.600819		0	6.31527e-08	7.63066e-05	0.000547176		6.31527e-08	-7.62434e-05	-0.000547113		-0.00047087
127	E<->T	1.31147	0.0001	0.059274	0.703845		0.00165574	6.31527e-08	6.98468e-05	0.000641004		-0.00165568	-6.97836e-05	-0.000640941		-0.000571157
79	A<->F	0.853414	0.215278	0.169017	0.4772		0.00107744	0.000135954	0.000199165	0.000434594		-0.000941489	-6.32108e-05	-0.000298641		-0.00023543
45	H<->I	0.499331	0.078696	0.084832	0.164678		0.00063041	4.96987e-05	9.99636e-05	0.000149975		-0.000580711	-5.02649e-05	-0.000100276		-5.00116e-05
36	G<->H	0.260407	0.0001	0.035749	0.0987272		0.000328766	6.31527e-08	4.21256e-05	8.99127e-05		-0.000328703	-4.20624e-05	-8.98495e-05		-4.77871e-05
122	R<->T	2.02313	0.0001	0.033436	0.212091		0.00255422	6.31527e-08	3.94e-05	0.000193155		-0.00255416	-3.93369e-05	-0.000193092		-0.000153755
56	A<->K	1.40774	0.0001	0.023415	0.153911		0.00177728	6.31527e-08	2.75916e-05	0.000140169		-0.00177722	-2.75284e-05	-0.000140106		-0.000112578
81	N<->F	0.231155	0.0001	0.019641	0.076319		0.000291836	6.31527e-08	2.31444e-05	6.95051e-05		-0.000291773	-2.30812e-05	-6.9442e-05		-4.63607e-05
44	G<->I	0.368054	0.0001	0.01919	0.0231199		0.000464671	6.31527e-08	2.26129e-05	2.10557e-05		-0.000464608	-2.25498e-05	-2.09926e-05		1.55721e-06
163	I<->Y	0.345102	0.165785	0.105147	0.336389		0.000435694	0.000104698	0.000123902	0.000306356		-0.000330996	-1.92044e-05	-0.000201658		-0.000182454
68	R<->M	12.0774	0.0001	0.0001	0.0247271		0.0152479	6.31527e-08	1.17837e-07	2.25194e-05		-0.0152478	-5.46844e-08	-2.24562e-05		-2.24016e-05
176	C<->V	5.94683	0.0001	0.0001	2.82752		0.00750793	6.31527e-08	1.17837e-07	0.00257507		-0.00750787	-5.46844e-08	-0.00257501		-0.00257495
189	W<->V	2.22488	0.0001	0.0001	0.34931		0.00280893	6.31527e-08	1.17837e-07	0.000318123		-0.00280887	-5.46844e-08	-0.00031806		-0.000318005
94	N<->P	1.38208	0.0001	0.0001	0.255283		0.00174489	6.31527e-08	1.17837e-07	0.000232491		-0.00174482	-5.46844e-08	-0.000232428		-0.000232373
99	G<->P	1.17748	0.0001	0.0001	0.0137641		0.00148658	6.31527e-08	1.17837e-07	1.25352e-05		-0.00148652	-5.46844e-08	-1.24721e-05		-1.24174e-05
29	A<->H	1.12846	0.0001	0.0001	0.172484		0.00142469	6.31527e-08	1.17837e-07	0.000157084		-0.00142463	-5.46844e-08	-0.000157021		-0.000156966
70	D<->M	1.12068	0.0001	0.0001	0.0403895		0.00141487	6.31527e-08	1.17837e-07	3.67834e-05		-0.00141481	-5.46844e-08	-3.67203e-05		-3.66656e-05
91	M<->F	1.02664	0.0001	0.0001	0.917388		0.00129614	6.31527e-08	1.17837e-07	0.000835482		-0.00129608	-5.46844e-08	-0.000835419		-0.000835364
128	G<->T	1.00318	0.0001	0.0001	0.0630789		0.00126653	6.31527e-08	1.17837e-07	5.74471e-05		-0.00126647	-5.46844e-08	-5.7384e-05		-5.73293e-05
139	N<->W	0.800745	0.0001	0.0001	0.0494368		0.00101095	6.31527e-08	1.17837e-07	4.50229e-05		-0.00101088	-5.46844e-08	-4.49598e-05		-4.49051e-05
38	R<->I	0.712567	0.0001	0.0001	0.00868689		0.000899623	6.31527e-08	1.17837e-07	7.9113e-06		-0.000899559	-5.46844e-08	-7.84815e-06		-7.79347e-06
71	C<->M	0.455056	0.0001	0.0001	0.626176		0.000574513	6.31527e-08	1.17837e-07	0.00057027		-0.000574449	-5.46844e-08	-0.000570206		-0.000570152
150	F<->W	0.380923	0.0001	0.0001	0.680533		0.000480918	6.31527e-08	1.17837e-07	0.000619774		-0.000480855	-5.46844e-08	-0.00061971		-0.000619656
174	N<->V	0.300032	0.0001	0.0001	0.102155		0.000378793	6.31527e-08	1.17837e-07	9.30346e-05		-0.00037873	-5.46844e-08	-9.29714e-05		-9.29168e-05
153	T<->W	0.282975	0.0001	0.0001	0.0235921		0.000357259	6.31527e-08	1.17837e-07	2.14857e-05		-0.000357195	-5.46844e-08	-2.14226e-05		-2.13679e-05
42	Q<->I	0.192475	0.0001	0.0001	0.0309444		0.000243002	6.31527e-08	1.17837e-07	2.81817e-05		-0.000242939	-5.46844e-08	-2.81185e-05		-2.80638e-05
146	I<->W	0.124584	0.0001	0.0001	0.0140772		0.000157288	6.31527e-08	1.17837e-07	1.28203e-05		-0.000157225	-5.46844e-08	-1.27572e-05		-1.27025e-05
154	A<->Y	0.0974888	0.0001	0.0001	0.0924458		0.00012308	6.31527e-08	1.17837e-07	8.41921e-05		-0.000123017	-5.46844e-08	-8.41289e-05		-8.40742e-05
20	C<->E	0	0.0001	0.0001	0.269668		0	6.31527e-08	1.17837e-07	0.000245592		6.31527e-08	-5.46844e-08	-0.000245529		-0.000245474
43	E<->I	0	0.0001	0.0001	0.00928853		0	6.31527e-08	1.17837e-07	8.45923e-06		6.31527e-08	-5.46844e-08	-8.39608e-06		-8.3414e-06
49	D<->L	0	0.0001	0.0001	0.01706		0	6.31527e-08	1.17837e-07	1.55369e-05		6.31527e-08	-5.46844e-08	-1.54737e-05		-1.5419e-05
52	E<->L	0	0.0001	0.0001	0.0558885		0	6.31527e-08	1.17837e-07	5.08987e-05		6.31527e-08	-5.46844e-08	-5.08356e-05		-5.07809e-05
73	E<->M	0	0.0001	0.0001	0.480848		0	6.31527e-08	1.17837e-07	0.000437917		6.31527e-08	-5.46844e-08	-0.000437854		-0.000437799
80	R<->F	0	0.0001	0.0001	0.0183701		0	6.31527e-08	1.17837e-07	1.673e-05		6.31527e-08	-5.46844e-08	-1.66669e-05		-1.66122e-05
85	E<->F	0	0.0001	0.0001	0.00246528		0	6.31527e-08	1.17837e-07	2.24518e-06		6.31527e-08	-5.46844e-08	-2.18203e-06		-2.12734e-06
98	E<->P	0	0.0001	0.0001	0.203594		0	6.31527e-08	1.17837e-07	0.000185417		6.31527e-08	-5.46844e-08	-0.000185353		-0.000185299
137	A<->W	0	0.0001	0.0001	0.0623692		0	6.31527e-08	1.17837e-07	5.68008e-05		6.31527e-08	-5.46844e-08	-5.67376e-05		-5.66829e-05
140	D<->W	0	0.0001	0.0001	0.199452		0	6.31527e-08	1.17837e-07	0.000181644		6.31527e-08	-5.46844e-08	-0.000181581		-0.000181527
143	E<->W	0	0.0001	0.0001	0.461612		0	6.31527e-08	1.17837e-07	0.000420399		6.31527e-08	-5.46844e-08	-0.000420335		-0.000420281
145	H<->W	0	0.0001	0.0001	0.226703		0	6.31527e-08	1.17837e-07	0.000206463		6.31527e-08	-5.46844e-08	-0.0002064		-0.000206345
148	K<->W	0	0.0001	0.0001	0.217618		0	6.31527e-08	1.17837e-07	0.000198188		6.31527e-08	-5.46844e-08	-0.000198125		-0.000198071
151	P<->W	0	0.0001	0.0001	0.148158		0	6.31527e-08	1.17837e-07	0.00013493		6.31527e-08	-5.46844e-08	-0.000134867		-0.000134812
173	R<->V	0	0.0001	0.0001	0.278633		0	6.31527e-08	1.17837e-07	0.000253756		6.31527e-08	-5.46844e-08	-0.000253693		-0.000253638
60	C<->K	0	0.000111	0.0001	0.183453		0	7.00995e-08	1.17837e-07	0.000167074		7.00995e-08	-4.77376e-08	-0.000167004		-0.000166956
17	R<->E	6.55842	0.00013	0.0001	0.698666		0.00828006	8.20985e-08	1.17837e-07	0.000636288		-0.00827998	-3.57386e-08	-0.000636206		-0.00063617
53	G<->L	0	0.007496	0.0001	0.0520589		0	4.73393e-06	1.17837e-07	4.7411e-05		4.73393e-06	4.61609e-06	-4.26771e-05		-4.72932e-05
124	D<->T	4.28022	0.188983	0.090233	0.669835		0.00540382	0.000119348	0.000106328	0.000610031		-0.00528447	1.30199e-05	-0.000490683		-0.000503703
101	I<->P	0.430063	0.033442	0.0001	0.136872		0.000542958	2.11195e-05	1.17837e-07	0.000124651		-0.000521838	2.10017e-05	-0.000103532		-0.000124534
86	G<->F	0.22507	0.035535	0.0001	0.115273		0.000284153	2.24413e-05	1.17837e-07	0.000104981		-0.000261712	2.23235e-05	-8.25401e-05		-0.000104864
168	P<->Y	0.394305	0.176205	0.065079	0.532613		0.000497813	0.000111278	7.66872e-05	0.00048506		-0.000386535	3.4591e-05	-0.000373782		-0.000408373
166	M<->Y	1.53926	0.061154	0.0001	0.589532		0.00194333	3.86204e-05	1.17837e-07	0.000536897		-0.00190471	3.85026e-05	-0.000498277		-0.000536779
180	H<->V	0.330275	0.097423	0.0001	0.0204364		0.000416976	6.15253e-05	1.17837e-07	1.86118e-05		-0.00035545	6.14074e-05	4.29135e-05		-1.84939e-05
75	H<->M	0.593912	0.099383	0.0001	0.180241		0.00074982	6.27631e-05	1.17837e-07	0.000164149		-0.000687056	6.26452e-05	-0.000101386		-0.000164031
25	D<->G	7.37061	9.21877	4.8829	7.39908		0.00930546	0.0058219	0.00575386	0.00673848		-0.00348356	6.80397e-05	-0.000916576		-0.000984616
187	S<->V	0.634738	0.110617	0.0001	0.431547		0.000801363	6.98576e-05	1.17837e-07	0.000393017		-0.000731505	6.97398e-05	-0.00032316		-0.000392899
170	T<->Y	0.58789	0.297528	0.090702	0.624712		0.000742216	0.000187897	0.000106881	0.000568937		-0.000554319	8.10164e-05	-0.00038104		-0.000462056
90	K<->F	0	0.13998	0.0001	0.0770747		0	8.84012e-05	1.17837e-07	7.01933e-05		8.84012e-05	8.82833e-05	1.82079e-05		-7.00754e-05
74	G<->M	0.393993	0.142541	0.0001	0.255027		0.000497419	9.00185e-05	1.17837e-07	0.000232257		-0.000407401	8.99007e-05	-0.000142239		-0.000232139
84	Q<->F	0	0.14756	0.0001	0.0935083		0	9.31881e-05	1.17837e-07	8.51597e-05		9.31881e-05	9.30703e-05	8.02847e-06		-8.50418e-05
161	G<->Y	0	0.15415	0.0001	0.155846		0	9.73499e-05	1.17837e-07	0.000141932		9.73499e-05	9.72321e-05	-4.45817e-05		-0.000141814
129	H<->T	1.51222	1.19387	0.547895	1.11441		0.00190919	0.000753961	0.000645624	0.00101491		-0.00115523	0.000108338	-0.000260952		-0.00036929
48	N<->L	0.549327	0.183326	0.0001	0.0334933		0.00069353	0.000115775	1.17837e-07	3.0503e-05		-0.000577755	0.000115658	8.52723e-05		-3.03852e-05
40	D<->I	0.314071	0.233987	0.017569	0.0181414		0.000396517	0.000147769	2.07028e-05	1.65217e-05		-0.000248748	0.000127066	0.000131247		4.18109e-06
115	I<->S	1.08267	0.36734	0.077517	0.326876		0.00136688	0.000231985	9.13438e-05	0.000297691		-0.00113489	0.000140641	-6.57062e-05		-0.000206348
65	I<->K	0	0.260907	0.0001	0.0431396		0	0.00016477	1.17837e-07	3.9288e-05		0.00016477	0.000164652	0.000125482		-3.91701e-05
126	Q<->T	0.874363	0.789322	0.263909	0.841174		0.00110389	0.000498478	0.000310983	0.000766072		-0.000605413	0.000187496	-0.000267594		-0.000455089
175	D<->V	1.24642	0.985961	0.352372	0.949327		0.00157362	0.000622661	0.000415225	0.000864569		-0.000950961	0.000207436	-0.000241908		-0.000449344
105	F<->P	0	1.55983	0.63313	0.51996		0	0.000985076	0.000746062	0.000473537		0.000985076	0.000239014	0.000511539		0.000272525
66	L<->K	0.181045	0.534588	0.061691	0.164652		0.000228571	0.000337607	7.26949e-05	0.000149952		0.000109035	0.000264912	0.000187655		-7.72567e-05
13	N<->Q	8.65996	0.928104	0.253075	2.90976		0.0109333	0.000586123	0.000298216	0.00264997		-0.0103471	0.000287907	-0.00206385		-0.00235175
82	D<->F	0	0.56261	0.0001	0.0432951		0	0.000355303	1.17837e-07	3.94296e-05		0.000355303	0.000355186	0.000315874		-3.93118e-05
132	K<->T	1.13188	2.91578	1.26122	2.96		0.00142901	0.00184139	0.00148619	0.00269573		0.000412377	0.000355203	-0.000854336		-0.00120954
18	N<->E	0	1.10321	0.190833	2.48597		0	0.000696706	0.000224872	0.00226402		0.000696706	0.000471834	-0.00156731		-0.00203915
156	N<->Y	0.554521	4.09546	1.77427	6.34551		0.000700088	0.0025864	0.00209075	0.00577897		0.00188631	0.000495646	-0.00319257		-0.00368822
1	A<->R	4.2272	1.85333	0.141858	0.478963		0.00533688	0.00117043	0.000167161	0.0004362		-0.00416645	0.00100326	0.000734226		-0.000269039
64	H<->K	0	1.8612	0.049187	1.30622		0	0.0011754	5.79605e-05	0.0011896		0.0011754	0.00111744	-1.42009e-05		-0.00113164
103	K<->P	0	2.30967	0.13977	1.05017		0	0.00145862	0.000164701	0.000956411		0.00145862	0.00129392	0.000502211		-0.00079171
95	D<->P	1.4354	2.05065	0.0001	0.203763		0.0018122	0.00129504	1.17837e-07	0.000185571		-0.000517163	0.00129492	0.00110947		-0.000185453
4	A<->D	2.48424	2.90347	0.405023	1.18064		0.00313637	0.00183362	0.000477267	0.00107523		-0.00130275	0.00135636	0.000758391		-0.000597964
47	R<->L	1.03552	3.52325	0.39719	0.583644		0.00130735	0.00222503	0.000468037	0.000531535		0.000917674	0.00175699	0.00169349		-6.34978e-05
10	D<->C	0	3.99318	0.481677	0.898119		0	0.0025218	0.000567594	0.000817933		0.0025218	0.0019542	0.00170387		-0.000250339
97	Q<->P	4.39838	14.6989	5.78793	6.80044		0.005553	0.00928278	0.00682033	0.00619328		0.00372978	0.00246245	0.0030895		0.000627048
15	C<->Q	0	4.03818	0.0001	0.860215		0	0.00255022	1.17837e-07	0.000783414		0.00255022	0.0025501	0.00176681		-0.000783296
57	R<->K	100	4.52455	0.13962	3.10148		0.126251	0.00285738	0.000164524	0.00282457		-0.123393	0.00269285	3.28081e-05		-0.00266005
23	R<->G	6.1316	6.99299	1.37962	2.16563		0.0077412	0.00441626	0.0016257	0.00197228		-0.00332494	0.00279056	0.00244398		-0.000346577
8	R<->C	1.93143	29.1691	12.8245	9.06075		0.00243845	0.0184211	0.015112	0.00825179		0.0159827	0.00330911	0.0101693		0.0068602
107	R<->S	1.8633	6.18229	0.227501	1.00039		0.00235243	0.00390428	0.000268081	0.000911074		0.00155186	0.0036362	0.00299321		-0.000642993
157	D<->Y	1.15183	6.76261	0.293189	1.37968		0.00145419	0.00427077	0.000345485	0.0012565		0.00281658	0.00392529	0.00301427		-0.000911016
32	D<->H	8.88848	8.48267	1.21396	6.05778		0.0112218	0.00535704	0.00143049	0.00551693		-0.00586475	0.00392654	-0.000159896		-0.00408644
109	D<->S	0	7.6084	0.742345	2.75248		0	0.00480491	0.000874758	0.00250673		0.00480491	0.00393015	0.00229818		-0.00163198
14	D<->Q	0	7.06486	0.082659	0.617085		0	0.00446165	9.7403e-05	0.00056199		0.00446165	0.00436425	0.00389966		-0.000464587
93	R<->P	0.814162	8.65696	0.762481	1.65201		0.00102789	0.00546711	0.000898486	0.00150452		0.00443922	0.00456862	0.00396259		-0.00060603
21	Q<->E	37.7949	15.177	3.35968	14.9435		0.0477164	0.00958469	0.00395895	0.0136093		-0.0381317	0.00562574	-0.00402464		-0.00965038
62	E<->K	0	20.2858	5.21595	15.9508		0	0.0128111	0.00614633	0.0145267		0.0128111	0.00666473	-0.00171563		-0.00838036
31	N<->H	8.55831	29.3009	9.06592	18.2321		0.0108049	0.0185043	0.010683	0.0166043		0.0076994	0.00782133	0.00190004		-0.00592129
159	Q<->Y	0	13.0666	0.300691	1.69442		0	0.00825194	0.000354326	0.00154313		0.00825194	0.00789761	0.0067088		-0.00118881
155	R<->Y	0	13.0869	0.004044	1.08361		0	0.0082647	4.76533e-06	0.000986861		0.0082647	0.00825994	0.00727784		-0.000982095
59	D<->K	6.65296	13.501	0.0001	0.144596		0.00839942	0.00852624	1.17837e-07	0.000131686		0.000126817	0.00852612	0.00839456		-0.000131568
30	R<->H	26.4683	36.8266	11.7923	16.3252		0.0334164	0.023257	0.0138957	0.0148676		-0.0101594	0.00936126	0.00838938		-0.000971881
61	Q<->K	12.2311	27.2073	6.22109	14.8218		0.0154418	0.0171822	0.00733075	0.0134985		0.0017403	0.0098514	0.00368367		-0.00616773
3	R<->N	0	24.3432	0.666003	1.13403		0	0.0153734	0.000784799	0.00103278		0.0153734	0.0145886	0.0143406		-0.000247985
108	N<->S	10.1217	59.5345	19.4854	28.543		0.0127787	0.0375976	0.0229611	0.0259946		0.0248189	0.0146365	0.011603		-0.00303357
138	R<->W	26.4156	32.9254	1.79632	4.13576		0.0333499	0.0207933	0.00211673	0.00376651		-0.0125566	0.0186766	0.0170268		-0.00164979
110	C<->S	12.8055	63.6284	17.9777	24.8731		0.0161671	0.0401831	0.0211844	0.0226524		0.024016	0.0189987	0.0175307		-0.00146798
12	R<->Q	30.6086	49.0452	10.0969	23.4754		0.0386436	0.0309734	0.0118979	0.0213795		-0.00767019	0.0190755	0.00959393		-0.00948153
34	Q<->H	35.4075	79.6227	21.1605	31.7119		0.0447023	0.0502839	0.0249349	0.0288806		0.00558159	0.025349	0.0214033		-0.00394565
6	N<->D	28.2609	86.819	22.8856	64.8679		0.0356797	0.0548286	0.0269678	0.0590763		0.0191489	0.0278608	-0.00424775		-0.0321085
19	D<->E	46.251	78.7002	14.2244	48.8972		0.0583923	0.0497013	0.0167616	0.0445316		-0.00869097	0.0329398	0.00516975		-0.02777
58	N<->K	17.6161	68.5206	7.58934	18.2021		0.0222404	0.0432726	0.00894306	0.016577		0.0210322	0.0343295	0.0266956		-0.00763394
	sum -->	792.074	1583.46	848.629	1098.03

## Sheet: AA freq comparisons
Index	Amino Acid	Polarity	JTTtm-DCMut	mtTM	mtExM	mtVer		diff mtTM - JTTtm		diff JTTtm - mtExM	diff mtTM - mtExM		diff JTTtm - mtVer	diff mtTM - mtVer	diff mtExM - mtVer
1	A	8.1	0.1051	0.099288	0.057905	0.0708203		-0.005812		0.047195	0.041383		0.0342797	0.0284677	-0.0129153		Positive values highlighed
2	R	10.5	0.0157	0.002371	0.035589	0.0140499		-0.013329		-0.019889	-0.033218		0.0016501	-0.0116789	0.0215391
3	N	11.6	0.0185	0.014236	0.057933	0.0452099		-0.004264		-0.039433	-0.043697		-0.0267099	-0.0309739	0.0127231
4	D	13	0.0089	0.004119	0.030167	0.0147937		-0.004781		-0.021267	-0.026048		-0.0058937	-0.0106747	0.0153733
5	C	5.5	0.0219	0.00909	0.005202	0.0068142		-0.01281		0.016698	0.003888		0.0150858	0.0022758	-0.0016122
6	Q	10.5	0.0141	0.010783	0.043148	0.0263409		-0.003317		-0.029048	-0.032365		-0.0122409	-0.0155579	0.0168071
7	E	12.3	0.0097	0.011178	0.039093	0.0214952		0.001478		-0.029393	-0.027915		-0.0117952	-0.0103172	0.0175978
8	G	9	0.0758	0.057695	0.048416	0.04424		-0.018105		0.027384	0.009279		0.03156	0.013455	0.004176
9	H	10.4	0.0168	0.019518	0.040609	0.024231		0.002718		-0.023809	-0.021091		-0.007431	-0.004713	0.016378
10	I	5.2	0.1188	0.100756	0.056825	0.0907351		-0.018044		0.061975	0.043931		0.0280649	0.0100209	-0.0339101
11	L	4.9	0.1635	0.234721	0.115368	0.17231		0.071221		0.048132	0.119353		-0.00881	0.062411	-0.056942
12	K	11.3	0.0112	0.008111	0.040963	0.0273812		-0.003089		-0.029763	-0.032852		-0.0161812	-0.0192702	0.0135818
13	M	5.7	0.0333	0.050265	0.038517	0.056194		0.016965		-0.005217	0.011748		-0.022894	-0.005929	-0.017677
14	F	5.2	0.0777	0.077757	0.035456	0.0497758		5.7e-05		0.042244	0.042301		0.0279242	0.0279812	-0.0143198
15	P	8	0.026	0.040425	0.083697	0.0543863		0.014425		-0.057697	-0.043272		-0.0283863	-0.0139613	0.0293107
16	S	9.2	0.0568	0.072407	0.079129	0.0744219		0.015607		-0.022329	-0.006722		-0.0176219	-0.0020149	0.0047071
17	T	8.6	0.0523	0.08533	0.102992	0.10881		0.03303		-0.050692	-0.017662		-0.05651	-0.02348	-0.005818
18	W	5.4	0.0223	0.031604	0.024765	0.0256527		0.009304		-0.002465	0.006839		-0.0033527	0.0059513	-0.0008877
19	Y	6.2	0.0324	0.0253	0.031929	0.0264847		-0.0071		0.000471	-0.006629		0.0059153	-0.0011847	0.0054443
20	V	5.9	0.1195	0.045045	0.032296	0.0458537		-0.074455		0.087204	0.012749		0.0736463	-0.0008087	-0.0135577
